# Supplementary material for: Rational guest selection: a general principle for stabilizing multi-component luminescent materials
Source: Royal Society of Chemistry journal article supplement (doi:10.1039/d5sc09220e), 2026-04-20
Supplement: d5sc09220e1.pdf [file d5sc09220e1.pdf]

## **Rational Guest Selection: A General Principle for Stabilizing Multi-Component Luminescent Materials**

*Li-Ke Jing,<sup>†</sup> Yue-Yue Chang,<sup>†</sup> He Li, Biao Lv, Guan-Yu Yang, Zhan-Ting Li, and Bo Yang\**

L. K. Jing, B. Lv, G. Y. Yang, B. Yang

College of Chemistry, Zhengzhou University, 100 Kexue Street, Zhengzhou, Henan 450001, China

E-mail: yangbohy@zzu.edu.cn

Y. Y. Chang

Department of Criminal Science and Technology, Henan Police College, Zhengzhou, Henan 450046, China.

H. Li

Innovation Team of Optical Functional Molecular, Devices, Inner Mongolia Key Laboratory for the Natural Products Chemistry and Functional Molecular Synthesis, College of Chemistry and Materials Science, Inner Mongolia Minzu University, Tongliao 028000, China

Z. T. Li

State Key Laboratory of Organometallic Chemistry, Shanghai Institute of Organic Chemistry, Chinese Academy of Sciences, University of Chinese Academy of Sciences, Shanghai, 200032, China

## Table of content

|                                            |   |
|--------------------------------------------|---|
| <b>Experimental methods</b> .....          | 3 |
| <b>Single crystal growth</b> .....         | 4 |
| <b>White-Light Tuning Experiment</b> ..... | 5 |
| <b>Photostability Assessment</b> .....     | 5 |
| Eu-P6MOF/C6/C1 System in DMF .....         | 5 |
| Eu-P6MOF/C6/Perylene System in DMF .....   | 6 |
| Eu-P6MOF/C6/Perylene System in EtOH .....  | 6 |
| Eu-P6MOF/C6/C1 System in EtOH .....        | 7 |
| <b>Characterization</b> .....              | 8 |

## Experimental methods

[4-(4-Methoxycarbonylphenyl)phenyl]boronic acid was purchased from Leyan (Cat. No. 1061459, Leyan, Shanghai, China). Europium(III) nitrate hexahydrate, acetic acid, and N,N-dimethylformamide were purchased from Energy Chemical Technology Co., Ltd. (Shanghai, China). All reagents were obtained from commercial suppliers and used without further purification unless otherwise noted.  $^1\text{H}$  and  $^{13}\text{C}$  NMR spectra were recorded on a Bruker AVANCE III HD 600M spectrometer, and all chemical shifts are reported in ppm relative to TMS.  $^1\text{H}$  and  $^{13}\text{C}$  NMR were recorded on 600 MHz spectrometers in the indicated solvents at room temperature (298 K). UV-Vis absorption spectra were recorded on a UV-2600i UV-Vis spectrophotometer. Solution-phase fluorescence spectra were acquired using a fluorescence spectrophotometer with excitation at 296 nm (RF-6000 spectrophotometer). Quantum yield and fluorescence lifetime data were collected using an Edinburgh FLS1000. X-ray diffraction (XRD) measurements were carried out using a PANalytical X'Pert PRO powder diffractometer. Transmission electron micrographs (TEM) were recorded on a FEI Tecnai G2 F20S-TWINTMP. IR spectra were recorded on an RX-3050TX+ IR Tracer-100+GCMS-TQ8050 NX system. Dynamic light scattering (DLS) measurements were conducted on a Malvern Zetasizer ZSU3100 using a monochromatic coherent He-Ne laser (633 nm) as the light source and a detector set at a  $90^\circ$  scattering angle.

Compound **1** was prepared according to reported method.<sup>1</sup>

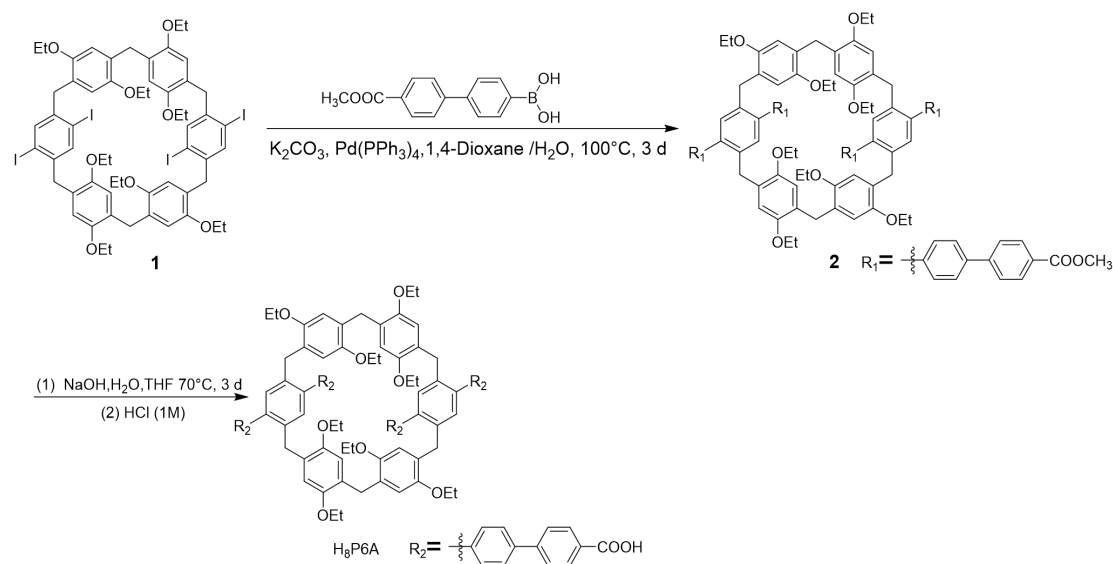

**Compound 2:** Compound **1** (2 g, 1.4 mmol, 1 equiv.), [4-(4-Methoxycarbonylphenyl)phenyl]boronic acid (1.8 g, 7 mmol, 5 equiv.), and  $\text{K}_2\text{CO}_3$  (400 mg, 2.9 mmol, 1.2 equiv.) were weighed into a 250-mL three-necked flask. A mixed solvent of 1,4-dioxane/water (3:1, 28 mL) was added. After purging with  $\text{N}_2$ , the catalyst  $\text{Pd}(\text{PPh}_3)_4$  (400 mg, 0.35 mmol, 0.25 equiv.) was added under  $\text{N}_2$  atmosphere. The reaction mixture was stirred at  $100^\circ\text{C}$  for 3 days. Upon completion,

the mixture was cooled to room temperature and quenched with water. The resulting mixture was filtered to afford a solid, which was washed with dichloromethane to collect the filtrate. The filtrate was concentrated under reduced pressure, then purified by column chromatography (PE:EA = 2:1, v/v) and recrystallized to give Compound **2** as a white solid (350 mg, 14.4% yield).

Compound H<sub>8</sub>P6A: Compound **2** (200 mg, 0.115 mmol, 1 equiv.) was weighed into a 100-mL round-bottom flask, and THF (15 mL) was added. The mixture was stirred at 70 °C until a clear solution was obtained. Aqueous NaOH solution (92 mg, 2.3 mmol, 20 equiv. in 15 mL water) was added, and the reaction was refluxed for 3 days. After cooling to room temperature, the organic phase was removed by rotary evaporation. The aqueous residue was adjusted to weak acidity with 1 M HCl (3 mL), and the resulting precipitate was filtered. The filter cake was washed with water (20 mL × 3), and the product H<sub>8</sub>P6A was collected and dried under vacuum to afford a white solid (190 mg, 98% yield). <sup>1</sup>H NMR (600 MHz, DMSO-d<sub>6</sub>) δ: 12.97 (s, 4H), 8.02 (d, J = 7.9 Hz, 8H), 7.58 (d, J = 8.0 Hz, 8H), 7.41 (d, J = 7.8 Hz, 8H), 7.10 (d, J = 7.8 Hz, 8H), 6.97 (s, 4H), 6.60 (s, 4H), 5.97 (s, 4H), 3.87 (d, J = 14.7 Hz, 4H), 3.77 (d, J = 14.6 Hz, 4H), 3.64 (dq, J = 15.4, 8.1 Hz, 8H), 3.56 (s, 4H), 3.47 – 3.33 (m, 8H), 1.10 (t, J = 6.8 Hz, 12H), 0.95 (t, J = 6.8 Hz, 12H). <sup>13</sup>C NMR (151 MHz, DMSO-d<sub>6</sub>) δ: 167.12, 166.01, 149.77, 149.65, 143.86, 141.22, 139.93, 137.15, 135.78, 131.65, 129.83, 129.48, 129.33, 127.27, 127.02, 126.49, 126.25, 114.89, 113.87, 63.35, 62.90, 33.73, 30.89, 14.71, 14.61.

The X-ray diffraction data of **Eu-P6MOF** (CCDC 2499388) was collected on a Bruker D8 VENTURE dual-wavelength Mo/Cu diffractometer equipped with INCOATEC Ims DIAMOND CuK $\alpha$  radiation ( $\lambda=1.54178$  Å) and a PHOTON II CMOS detector with a Helios Multi-layer Optic monochromator at 200 k and using an Oxford Cryosystems Cryostream 800 cryostat. These data are provided free of charge by the joint Cambridge Crystallographic Data Centre via [www.ccdc.cam.ac.uk/data\\_request/cif](http://www.ccdc.cam.ac.uk/data_request/cif). All data integration and empirical absorption correction were carried out using the SAINT program. Using Olex2 and SHELXTL, the structure was solved by direct method and refined matrix least-squares on F<sup>2</sup> with anisotropic displacement. Non-hydrogen atoms were refined anisotropically, hydrogen atoms were constrained to ideal geometries.

### Single crystal growth.

**Eu-P6MOF**: H<sub>8</sub>P6A (3 mg, 0.0017 mmol, 1 equiv.) was weighed into a 4-mL vial and dissolved in DMF (500  $\mu$ L). Aqueous 1 mol/L europium(III) nitrate hexahydrate solution (20  $\mu$ L, 12 equiv.), 1 mol/L potassium carbonate aqueous solution (1.7  $\mu$ L, 1 equiv.), and glacial acetic acid (80  $\mu$ L) were added sequentially. After sonication for 10 minutes, the vial was placed in an oven at 120 °C. After 2 days, single crystals suitable for X-ray diffraction analysis were obtained as pale yellow crystals, which

exhibited red fluorescence under a 365 nm UV lamp.

## White-Light Tuning Experiment

All photoluminescence measurements for white-light tuning experiments were performed on an RF-6000 spectrofluorophotometer. The spectra were recorded under the following conditions: excitation wavelength ( $\lambda_{\text{ex}}$ ) = 296 nm, emission range = 310–750 nm, with both excitation and emission slit widths set to 5 nm.

## Photostability Assessment

The photodegradation experiments were performed using a commercial UV analyzer (ZF-1 type) equipped with a 365 nm UV lamp. All measurements were conducted in a dark chamber to avoid interference from ambient light. The samples were placed directly below the UV lamp and irradiated vertically through a UV filter under constant geometric conditions. The lamp power was 6 W, and the irradiation conditions were kept identical for all samples to ensure meaningful comparison. All photostability tests were carried out at ambient temperature without external heating or cooling, and no noticeable temperature increase of the samples was observed during illumination.

## Eu-P6MOF/C6/C1 System in DMF

### Sample Information:

**Eu-P6MOF:** 3 mg was sonicated in 30 mL DMF for 3 hours to form a suspension.

**Coumarin 6 (G):** 1 mg dissolved in DMF and volumetrically diluted to 10 mL (1 mg/10 mL).

**Coumarin 1 (B):** 1 mg dissolved in DMF and volumetrically diluted to 10 mL (1 mg/10 mL).

**White-Light Titration Experiment:** A 2 mL aliquot of the **Eu-P6MOF** suspension (initial CIE coordinate: (0.6350, 0.3337)) was titrated sequentially with C6 (G) and C1 (B): first, C6 (G) was gradually added in 1  $\mu\text{L}$  (0.1  $\mu\text{g}$ ) intervals until the CIE coordinate approached the red-green boundary, with a total addition of 3  $\mu\text{L}$  (0.3  $\mu\text{g}$ ) and a final coordinate of (0.4305, 0.4788); subsequently, C1 (B) was titrated into the mixture with a total addition of 10  $\mu\text{L}$  (1  $\mu\text{g}$ ), where 5  $\mu\text{L}$  (0.5  $\mu\text{g}$ ) of addition achieved theoretical white light (CIE: (0.3337, 0.3346)), using 1  $\mu\text{L}$  (0.1  $\mu\text{g}$ ) intervals for most additions and 0.5  $\mu\text{L}$  (0.05  $\mu\text{g}$ ) intervals near the white-light point.

**Photostability Assessment:** Photostability was evaluated by irradiating a series of samples (listed below) under 365 nm light for 24 h, followed by fluorescence spectral measurement and calculation of corresponding CIE chromaticity coordinates.

**Eu-P6MOF** suspension (0.1 mg/mL, prepared by sonication in DMF for 3 hours, 2 mL aliquot);

Coumarin 1 (0.25  $\mu\text{g}/\text{mL}$ , 5  $\mu\text{L}$  of 0.1 mg/mL stock solution in 2 mL DMF);

Coumarin 6 (0.15  $\mu\text{g}/\text{mL}$ , 3  $\mu\text{L}$  of 0.1 mg/mL stock solution in 2 mL DMF);

**Eu-P6MOF-C1** (**Eu-P6MOF:** 0.1 mg/mL suspension in DMF, 2 mL; **C1:** 0.1 mg/mL, 5  $\mu\text{L}$  added thereto);

**Eu-P6MOF-C6** (**Eu-P6MOF**: 0.1 mg/mL suspension in DMF, 2 mL; C6: 0.1 mg/mL, 3  $\mu$ L added thereto);

**Eu-P6MOF-C6-C1** (**Eu-P6MOF**: 0.1 mg/mL suspension in DMF, 2 mL; C1: 0.1 mg/mL, 5  $\mu$ L added thereto; C6: 0.1 mg/mL, 3  $\mu$ L added thereto).

## **Eu-P6MOF/C6/Perylene System in DMF**

### **Sample Information:**

**Eu-P6MOF**: 3 mg was sonicated in 30 mL DMF for 3 hours to form a suspension.

Coumarin 6 (G): 1 mg dissolved in DMF and volumetrically diluted to 10 mL (1 mg/10 mL).

Perylene (B): 1 mg dissolved in DMF and volumetrically diluted to 10 mL (1 mg/10 mL).

**White-Light Titration Experiment:** A 2 mL aliquot of the **Eu-P6MOF** suspension (initial CIE coordinate: (0.6382, 0.3320)) was titrated sequentially with C6 (G) and Perylene (B): first, C6 (G) was gradually added in 0.5  $\mu$ L (0.05  $\mu$ g) intervals until the CIE coordinate approached the red-green boundary, with a total addition of 2.5  $\mu$ L (0.25  $\mu$ g) and a final coordinate of (0.4310, 0.4785); subsequently, Perylene (B) was titrated into the mixture with a total addition of 15  $\mu$ L (1.5  $\mu$ g), where 10.5  $\mu$ L (1.05  $\mu$ g) of addition achieved theoretical white light (CIE: (0.3283, 0.3348)), using 2  $\mu$ L (0.2  $\mu$ g) intervals for most additions and 0.5  $\mu$ L (0.05  $\mu$ g) intervals near the white-light point.

**Photostability Assessment:** Photostability was evaluated by irradiating a series of samples (listed below) under 365 nm light for 24 h, followed by fluorescence spectral measurement and calculation of corresponding CIE chromaticity coordinates.

Perylene (0.525  $\mu$ g/mL, 10.5  $\mu$ L of 0.1 mg/mL stock solution in 2 mL DMF);

**Eu-P6MOF-Perylene** (**Eu-P6MOF**: 0.1 mg/mL suspension in DMF, 2 mL; Perylene: 0.1 mg/mL, 10.5  $\mu$ L added thereto);

**Eu-P6MOF-C6-Perylene** (**Eu-P6MOF**: 0.1 mg/mL suspension in DMF, 2 mL; Perylene: 0.1 mg/mL, 10.5  $\mu$ L added thereto; C6: 0.1 mg/mL, 2.5  $\mu$ L added thereto).

## **Eu-P6MOF/C6/Perylene System in EtOH**

### **Sample Information:**

**Eu-P6MOF**: 3 mg was sonicated in 30 mL EtOH for 3 hours to form a suspension.

Coumarin6 (G): 1 mg in 10 mL volumetric flask (EtOH, q.s.), then diluted 10  $\times$  (100  $\mu$ L + 900  $\mu$ L EtOH) to 0.01 mg/mL.

Perylene (B): 1 mg in 10 mL volumetric flask (EtOH, q.s.), then diluted 10  $\times$  (100  $\mu$ L + 900  $\mu$ L EtOH) to 0.01 mg/mL.

**White-Light Titration Experiment:** A 2 mL aliquot of the **Eu-P6MOF** suspension (initial CIE coordinate: (0.6086, 0.3285)) was titrated sequentially with C6 (G) and Perylene (B): first, C6 (G) was gradually added with 2  $\mu$ L (0.02  $\mu$ g) intervals up to 8  $\mu$ L, followed by a final 0.5  $\mu$ L (0.005  $\mu$ g) addition until the CIE coordinate approached the red-green boundary, with a total addition of 8.5  $\mu$ L (0.085  $\mu$ g) and a

final coordinate of (0.4227, 0.4397); subsequently, Perylene (B) was titrated into the mixture with a total addition of 50  $\mu\text{L}$  (0.5  $\mu\text{g}$ ), where 30  $\mu\text{L}$  (0.3  $\mu\text{g}$ ) of addition achieved theoretical white light (CIE: (0.3393, 0.3272)), using 5  $\mu\text{L}$  (0.05  $\mu\text{g}$ ) intervals for most additions and 2.5  $\mu\text{L}$  (0.025  $\mu\text{g}$ ) intervals near the white-light point.

**Photostability Assessment:** Photostability was evaluated by irradiating a series of samples (listed below) under 365 nm light for 24 h, followed by fluorescence spectral measurement and calculation of corresponding CIE chromaticity coordinates.

**Eu-P6MOF** suspension (0.1 mg/mL, prepared by sonication in EtOH for 3 hours, 2 mL aliquot);

Coumarin 6 (0.0425  $\mu\text{g}/\text{mL}$ , 8.5  $\mu\text{L}$  of 0.01 mg/mL stock solution in 2 mL EtOH);

Perylene (0.15  $\mu\text{g}/\text{mL}$ , 30  $\mu\text{L}$  of 0.01 mg/mL stock solution in 2 mL EtOH);

**Eu-P6MOF-C6-Perylene (Eu-P6MOF:** 0.1 mg/mL suspension in EtOH, 2 mL; Perylene : 0.01 mg/mL, 30  $\mu\text{L}$  added thereto; C6: 0.01 mg/mL, 8.5  $\mu\text{L}$  added thereto).

## **Eu-P6MOF/C6/C1 System in EtOH**

### **Sample Information:**

**Eu-P6MOF:** 3 mg was sonicated in 30 mL EtOH for 3 hours to form a suspension.

Coumarin 6 (G): 1 mg in 10 mL volumetric flask (EtOH, q.s.), then diluted  $10 \times$  (100  $\mu\text{L}$  + 900  $\mu\text{L}$  EtOH) to 0.01 mg/mL.

Coumarin 1 (B): 1 mg in 10 mL volumetric flask (EtOH, q.s.), then diluted  $10 \times$  (100  $\mu\text{L}$  + 900  $\mu\text{L}$  EtOH) to 0.01 mg/mL.

**White-Light Titration Experiment:** A 2 mL aliquot of the **Eu-P6MOF** suspension (initial CIE coordinate: (0.6092, 0.3298)) was titrated sequentially with C6 (G) and C1 (B): first, C6 (G) was gradually added with 2  $\mu\text{L}$  (0.02  $\mu\text{g}$ ) intervals up to 8  $\mu\text{L}$ , followed by a final 0.5  $\mu\text{L}$  (0.005  $\mu\text{g}$ ) addition until the CIE coordinate approached the red-green boundary, with a total addition of 8.5  $\mu\text{L}$  (0.085  $\mu\text{g}$ ) and a final coordinate of (0.4254, 0.4449); subsequently, C1 (B) was titrated into the mixture with a total addition of 20  $\mu\text{L}$  (0.2  $\mu\text{g}$ ), where 14  $\mu\text{L}$  (0.14  $\mu\text{g}$ ) of addition achieved theoretical white light (CIE: (0.3375, 0.3299)), using 2.5  $\mu\text{L}$  (0.025  $\mu\text{g}$ ) intervals for most additions and 0.5  $\mu\text{L}$  (0.005  $\mu\text{g}$ ) intervals near the white-light point.

**Photostability Assessment:** Photostability was evaluated by irradiating a series of samples (listed below) under 365 nm light for 24 h, followed by fluorescence spectral measurement and calculation of corresponding CIE chromaticity coordinates.

Coumarin 1 (0.07  $\mu\text{g}/\text{mL}$ , 14  $\mu\text{L}$  of 0.01 mg/mL stock solution in 2 mL EtOH);

**Eu-P6MOF-C6-C1 (Eu-P6MOF:** 0.1 mg/mL suspension in EtOH, 2 mL; C1: 0.01 mg/mL, 14  $\mu\text{L}$  added thereto; C6: 0.01 mg/mL, 8.5  $\mu\text{L}$  added thereto).

## Characterization

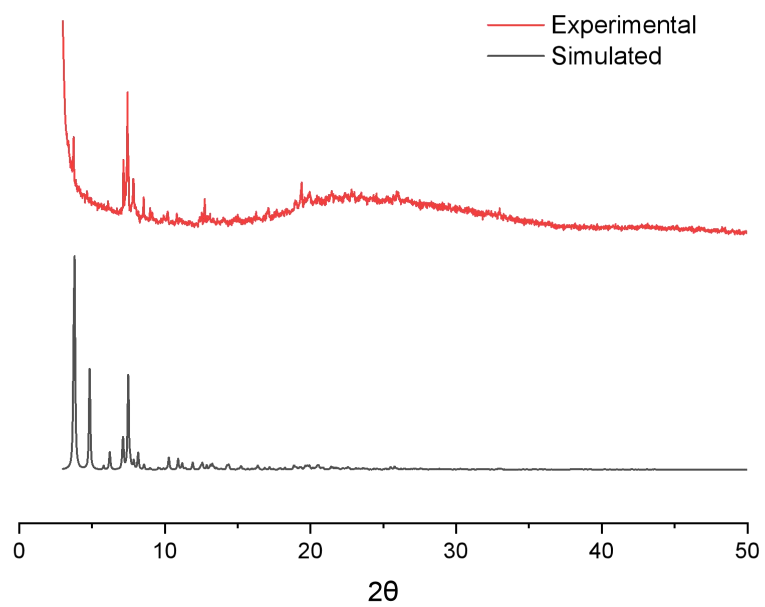

**Figure S1.** PXRD spectra of Eu-P6MOF.

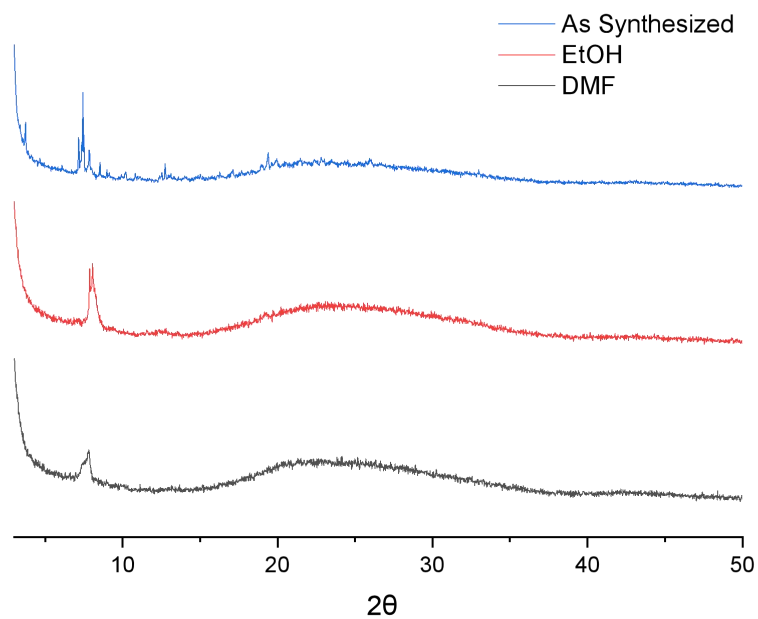

**Figure S2.** PXRD of **Eu-P6MOF** after being immersed in DMF and EtOH.

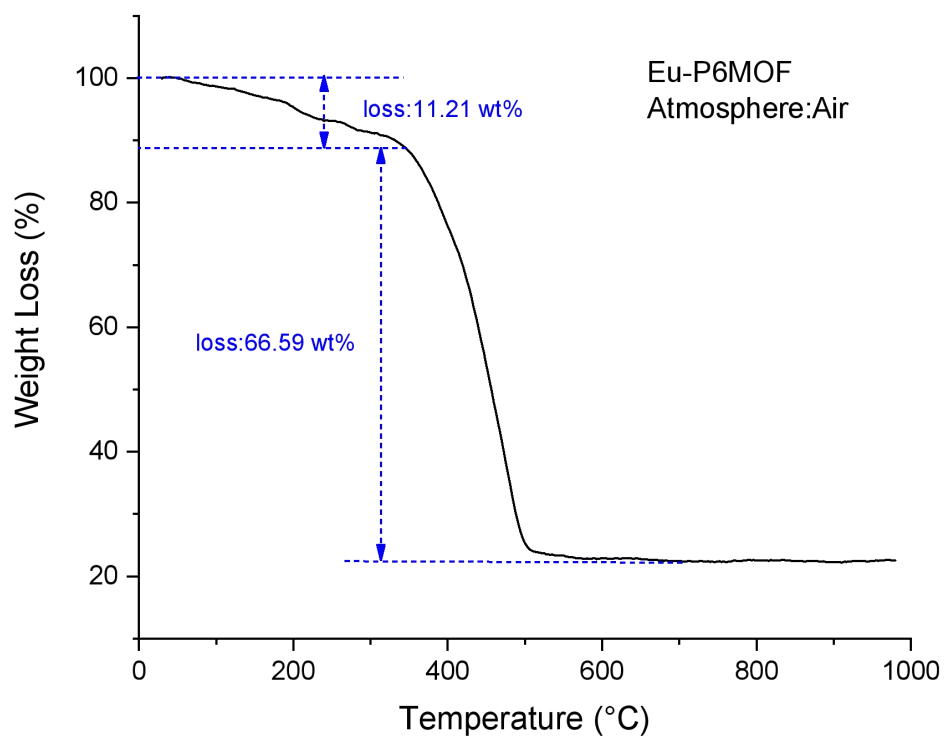

**Figure S3.** TG spectra of **Eu-P6MOF**.

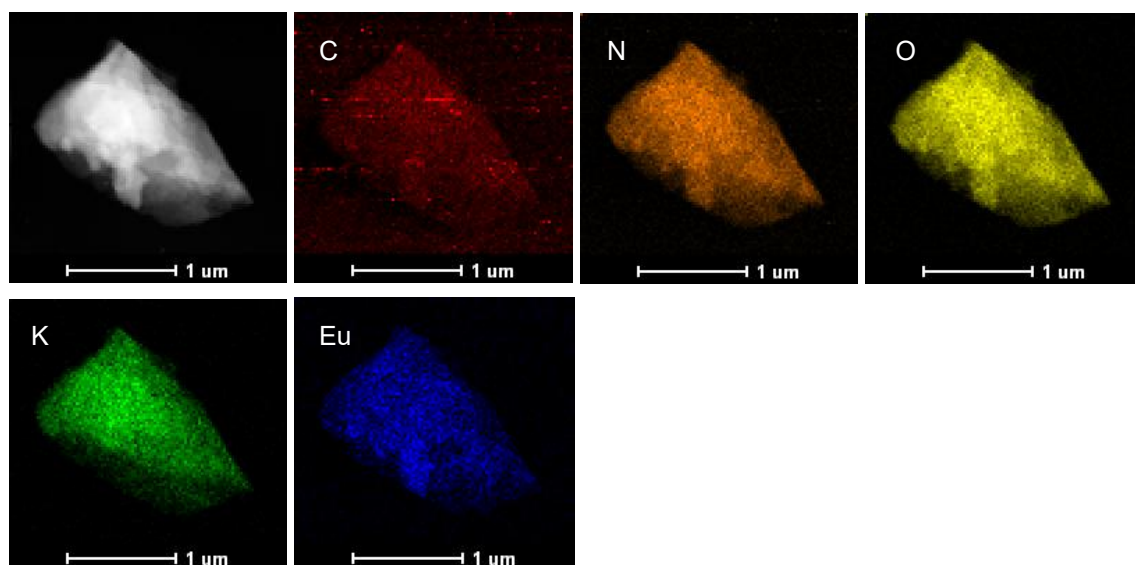

**Figure S4.** Elemental mapping images of Eu-P6MOF.

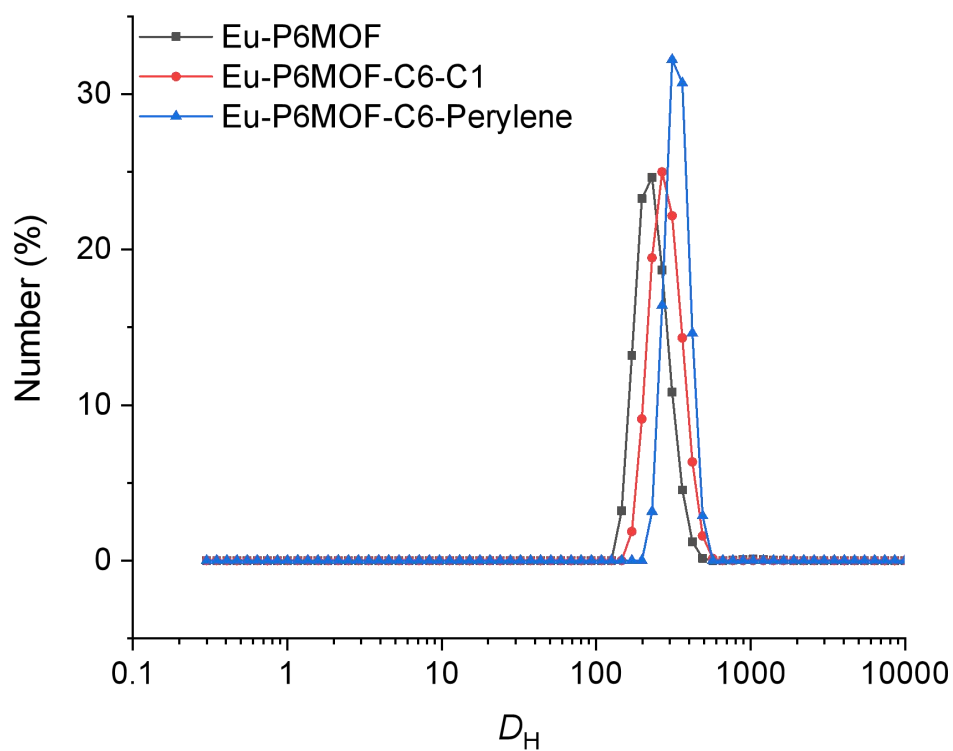

**Figure S5.** The hydrodynamic diameters ( $D_H$ ) of the aggregates of **Eu-P6MOF**, **Eu-P6MOF-C6-C1** and **Eu-P6MOF-C6-Perylene** in EtOH at 25 °C.

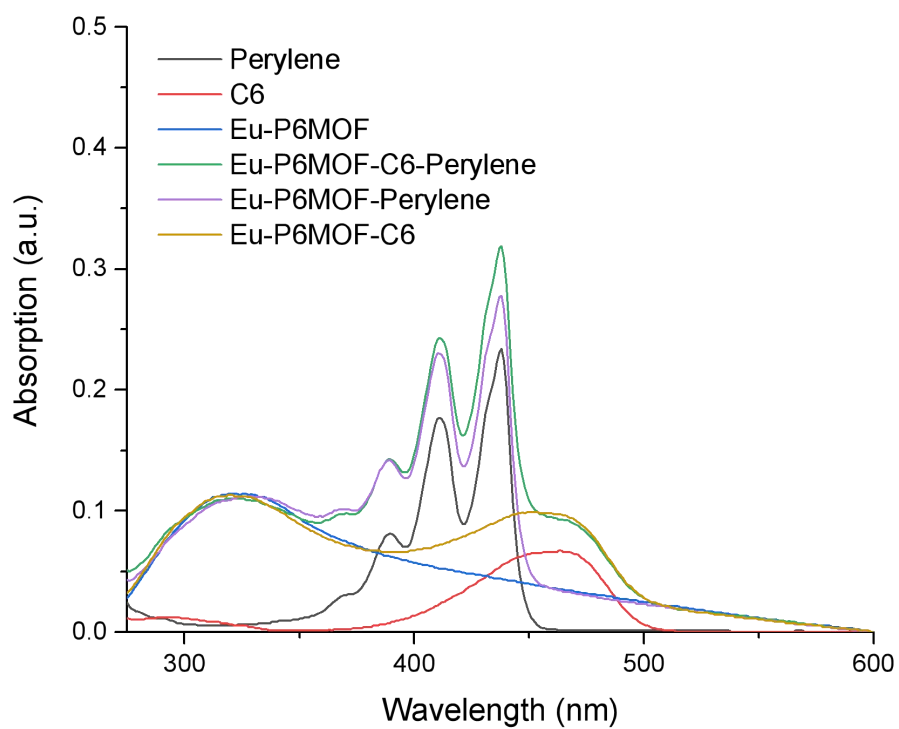

**Figure S6.** The UV-Vis spectra of **Eu-P6MOF**, **C6**, **Perylene**, **Eu-P6MOF-C6**, **Eu-P6MOF-Perylene**, and **Eu-P6MOF-C6-Perylene** in DMF.

### Fluorescence titration experiments

Fluorescence titration experiments were carried out to investigate the interaction between dye molecules and the Eu-P6MOF framework in DMF.

#### Preparation of dye solutions

Dilute dye solutions were prepared by adding aliquots of dye stock solutions (0.1 mg/mL in DMF) into 2 mL of DMF. The dye amounts were selected according to the relative dye loading used in the white-light host–guest composite systems to ensure comparable experimental conditions. The dye solutions were prepared as follows:

Coumarin 6: 2.5  $\mu$ L of stock solution (0.1 mg/mL in DMF) in 2 mL DMF

Coumarin 1: 5  $\mu$ L of stock solution (0.1 mg/mL in DMF) in 2 mL DMF

Perylene: 10.5  $\mu$ L of stock solution (0.1 mg/mL in DMF) in 2 mL DMF

**Eu-P6MOF** suspension: 20 mg of **Eu-P6MOF** dispersed in 400  $\mu$ L of DMF

### Fluorescence titration procedure

The **Eu-P6MOF** suspension was gradually added to the dye solutions in 10  $\mu$ L aliquots, corresponding to 0.5 mg of **Eu-P6MOF** per addition. After each addition, the mixture was gently mixed. The fluorescence emission spectra were recorded under an excitation wavelength of 296 nm over the spectral range of 310–750 nm.

During the titration process, the characteristic emission peaks of the dye molecules were monitored to evaluate the changes in fluorescence intensity. The emission intensity at the characteristic peak wavelength was plotted as a function of the amount of **Eu-P6MOF** added. For all three dye systems (Coumarin 6, Coumarin 1, and perylene), gradual quenching of the dye fluorescence was observed with increasing **Eu-P6MOF** addition. The resulting fluorescence intensity versus MOF loading curves were further fitted using an exponential decay model (ExpDec1) to visualize the variation trend. The fitting results show that the fluorescence intensity gradually approaches a plateau with increasing MOF addition. The near-plateau regions can be approximately identified at around 11 mg for Coumarin 6 and around 20 mg for Coumarin 1 and Perylene.

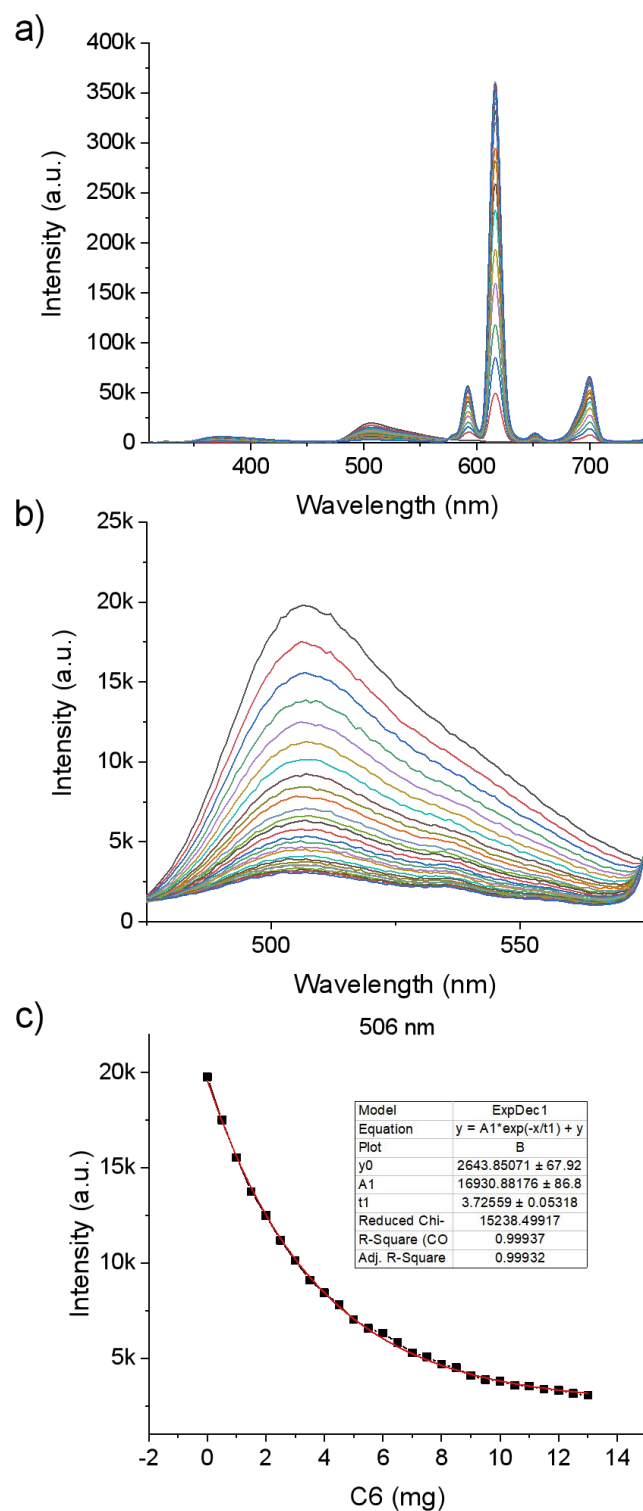

**Figure S7.** a) Fluorescence titration spectra of Coumarin 6 upon incremental addition of **Eu-P6MOF** in DMF. b) Evolution of the characteristic emission peak of Coumarin 6 during fluorescence titration. c) Fluorescence intensity versus the amount of **Eu-P6MOF** added for the Coumarin 6 system with exponential decay fitting.

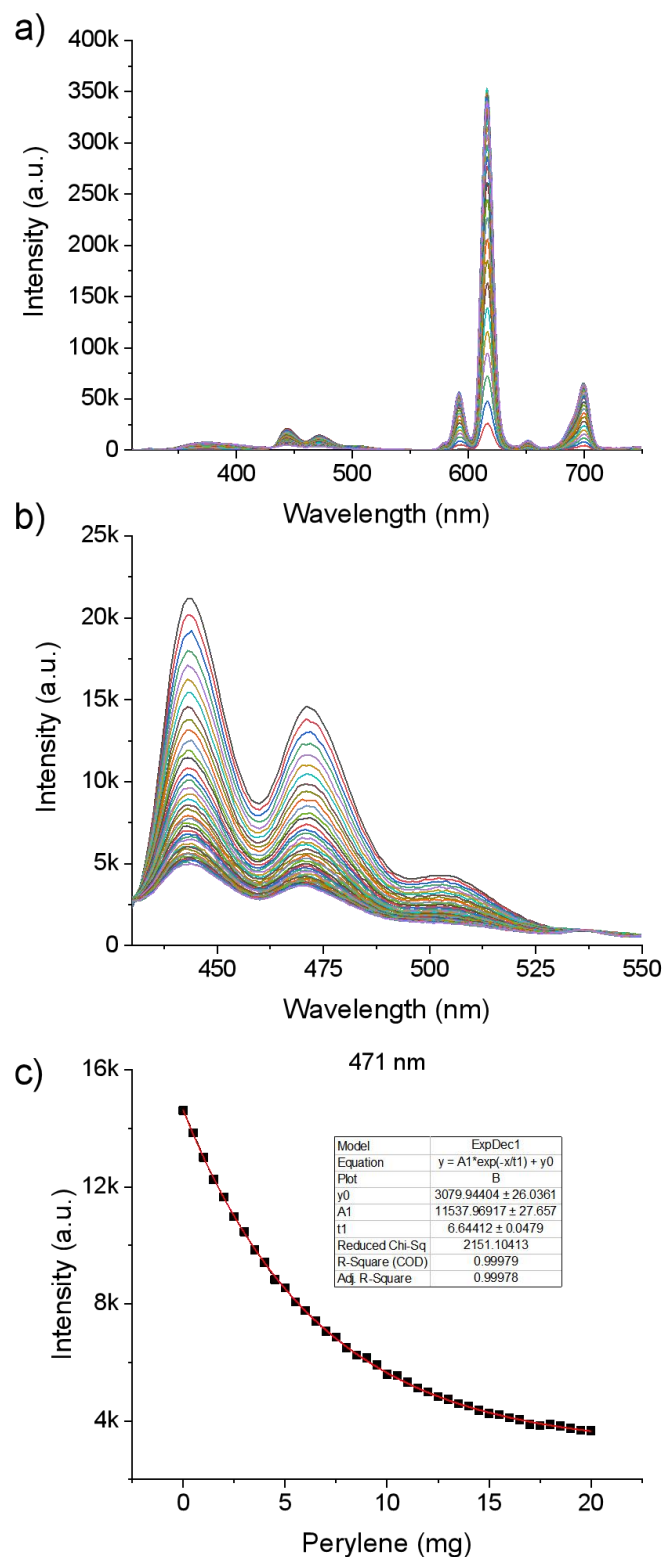

**Figure S8.** a) Fluorescence titration spectra of perylene upon incremental addition of **Eu-P6MOF** in DMF. b) Evolution of the characteristic emission peak of perylene during fluorescence titration. c) Fluorescence intensity versus the amount of **Eu-P6MOF** added for the Perylene system with exponential decay fitting.

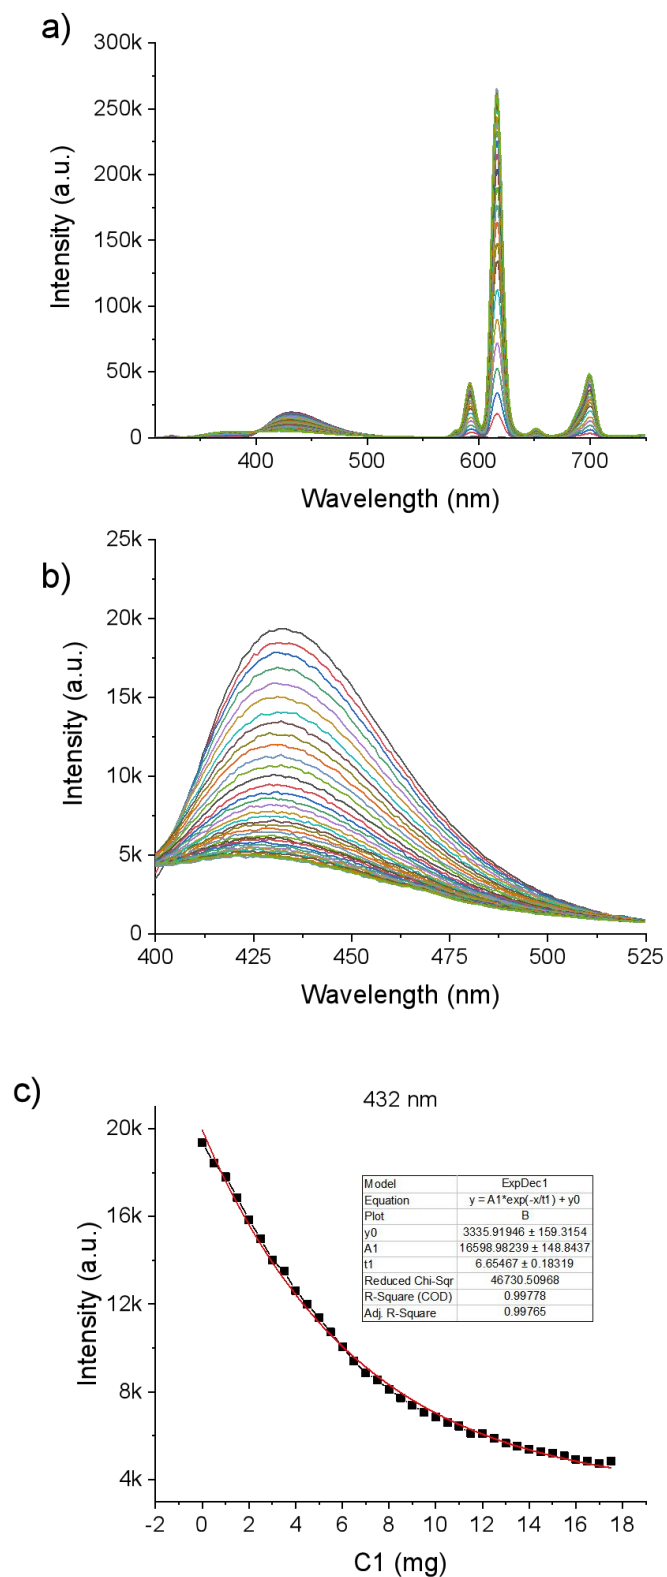

**Figure S9.** a) Fluorescence titration spectra of Coumarin 1 upon incremental addition of **Eu-P6MOF** in DMF. b) Evolution of the characteristic emission peak of Coumarin 1 during fluorescence titration. c) Fluorescence intensity versus the amount of **Eu-P6MOF** added for the Coumarin 1 system with exponential decay fitting.

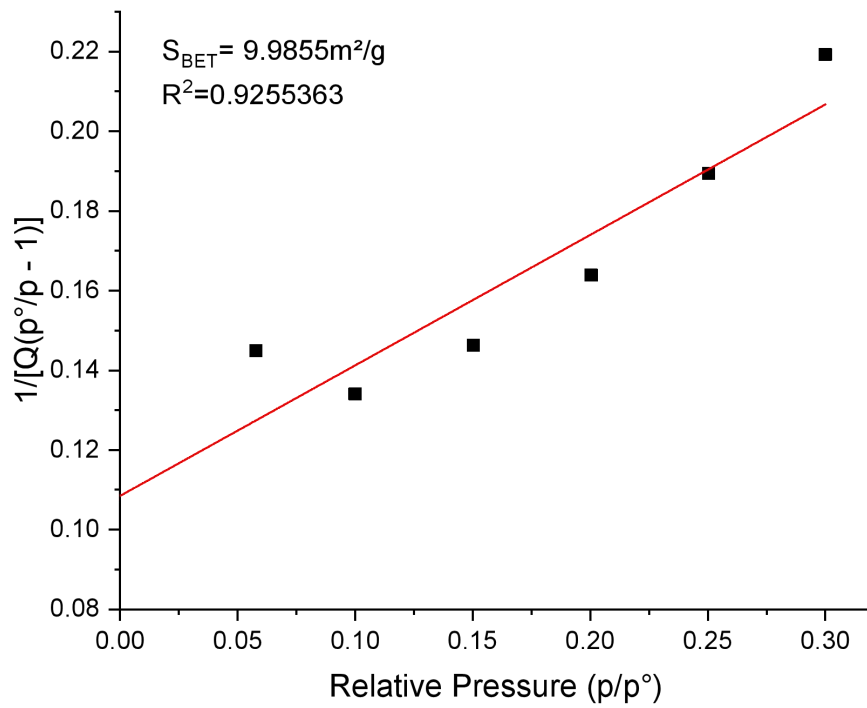

**Figure S10.** BET surface area plot for **Eu-P6MOF**.

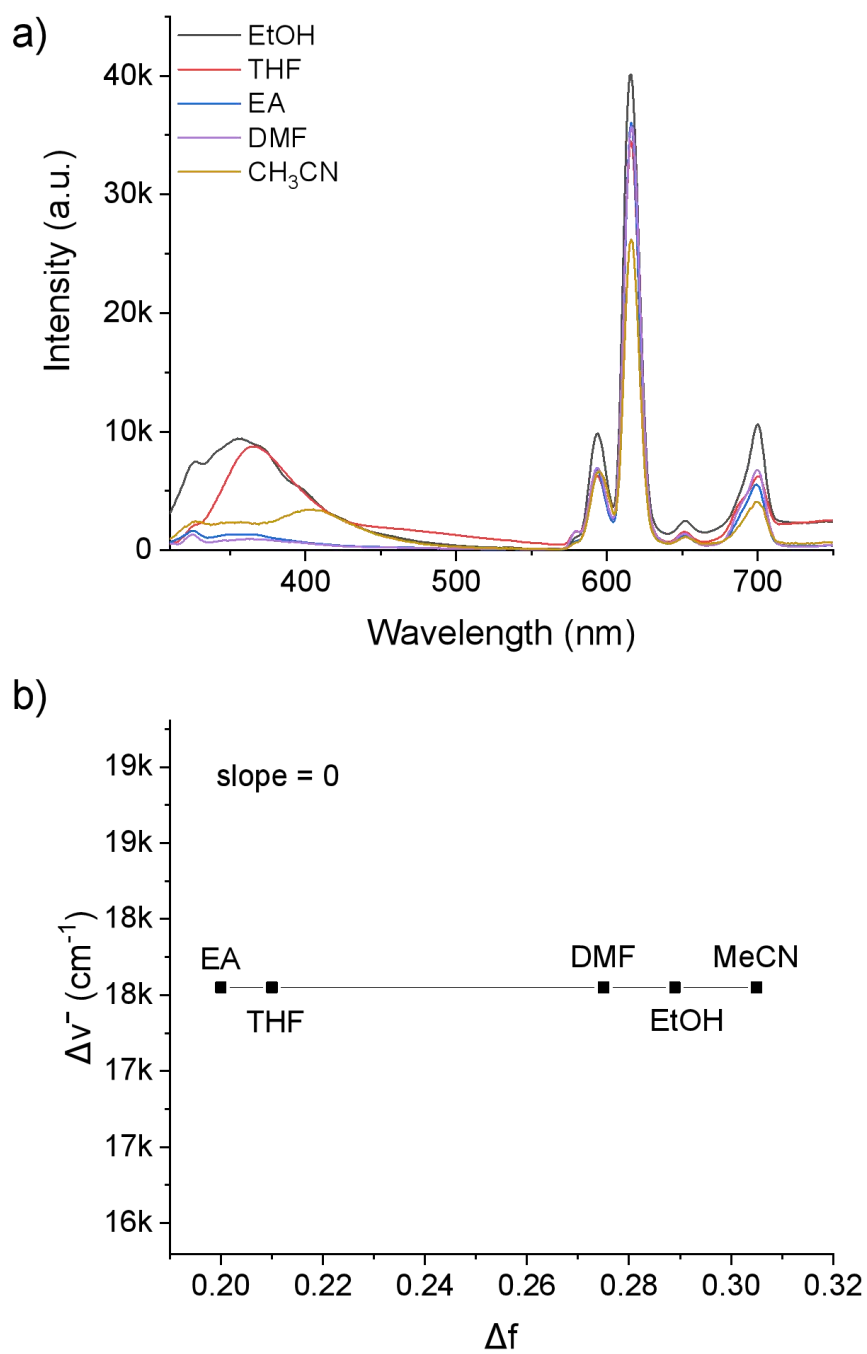

**Figure S11.** (a) Fluorescence spectra of **Eu-P6MOF** recorded in solvents with different polarities (DMF, EtOH, EA, THF, and CH<sub>3</sub>CN) under excitation at 296 nm. (b) Lippert–Mataga plot constructed from the emission maxima of **Eu-P6MOF** in solvents with different polarities

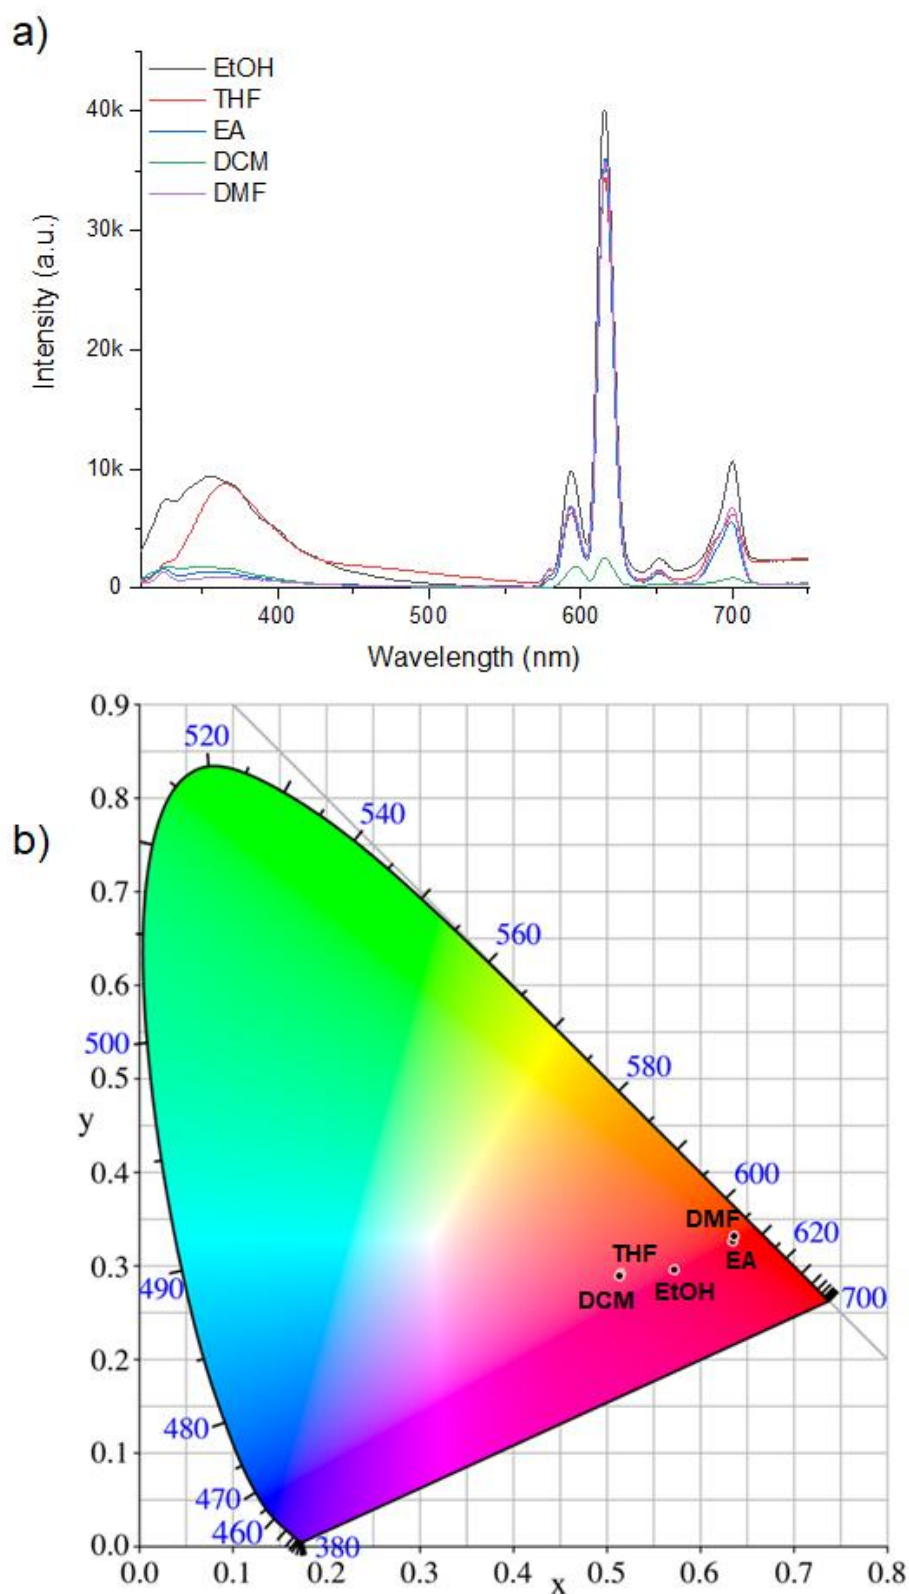

**Figure S12.** (a) Fluorescence spectra of **Eu-P6MOF** recorded in solvents with different polarities (DMF, EtOH, EA, THF, and CH<sub>3</sub>CN) under excitation at 296 nm and its corresponding (b) CIE coordinates.

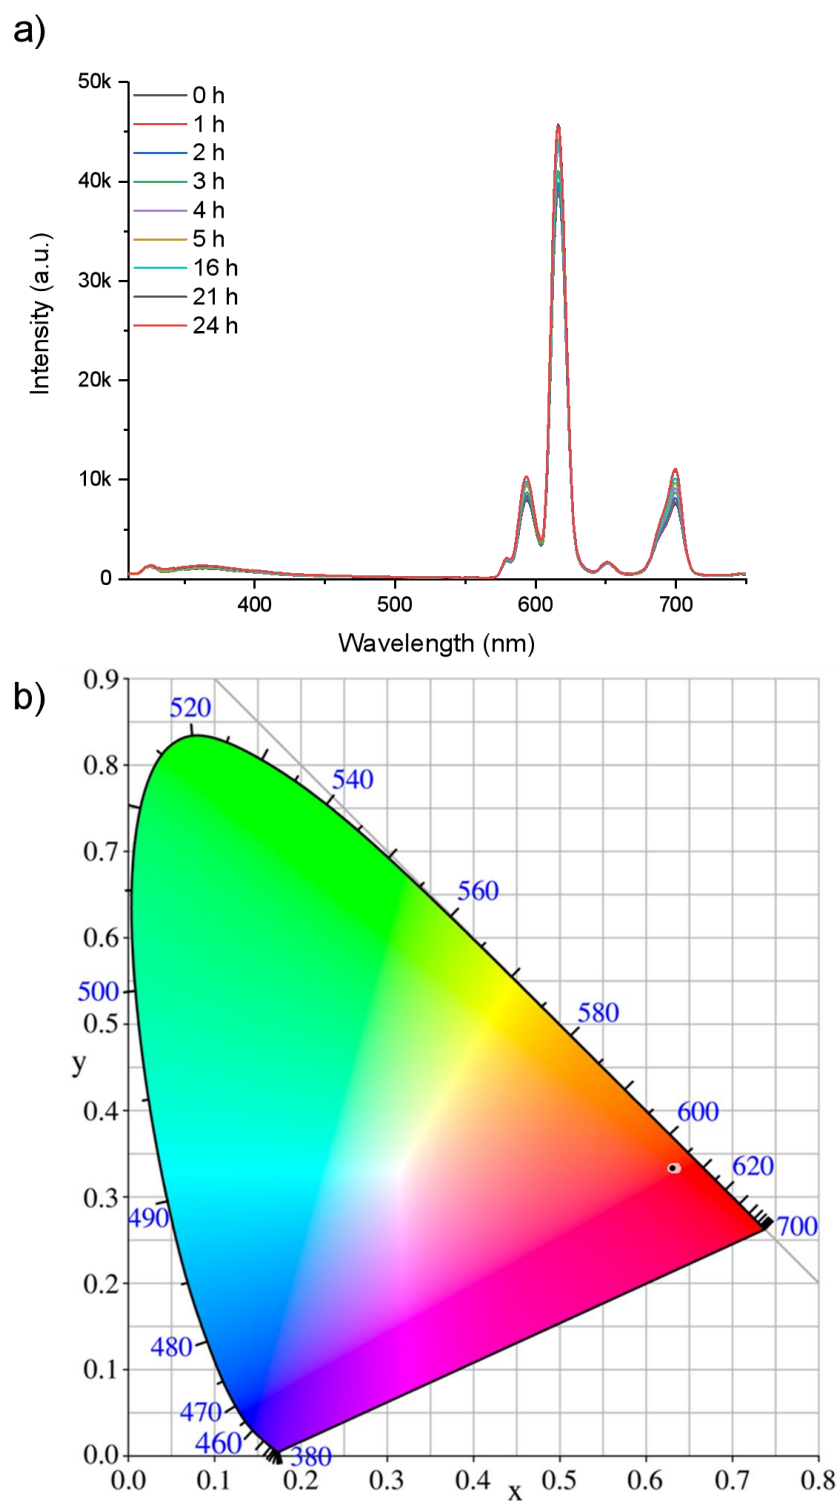

**Figure S13.** Photostability of **Eu-P6MOF** suspension (0.1 mg/mL, prepared by sonication in DMF for 3 hours, 2 mL aliquot) under 365 nm irradiation for 24 hours and its corresponding (b) CIE coordinates.

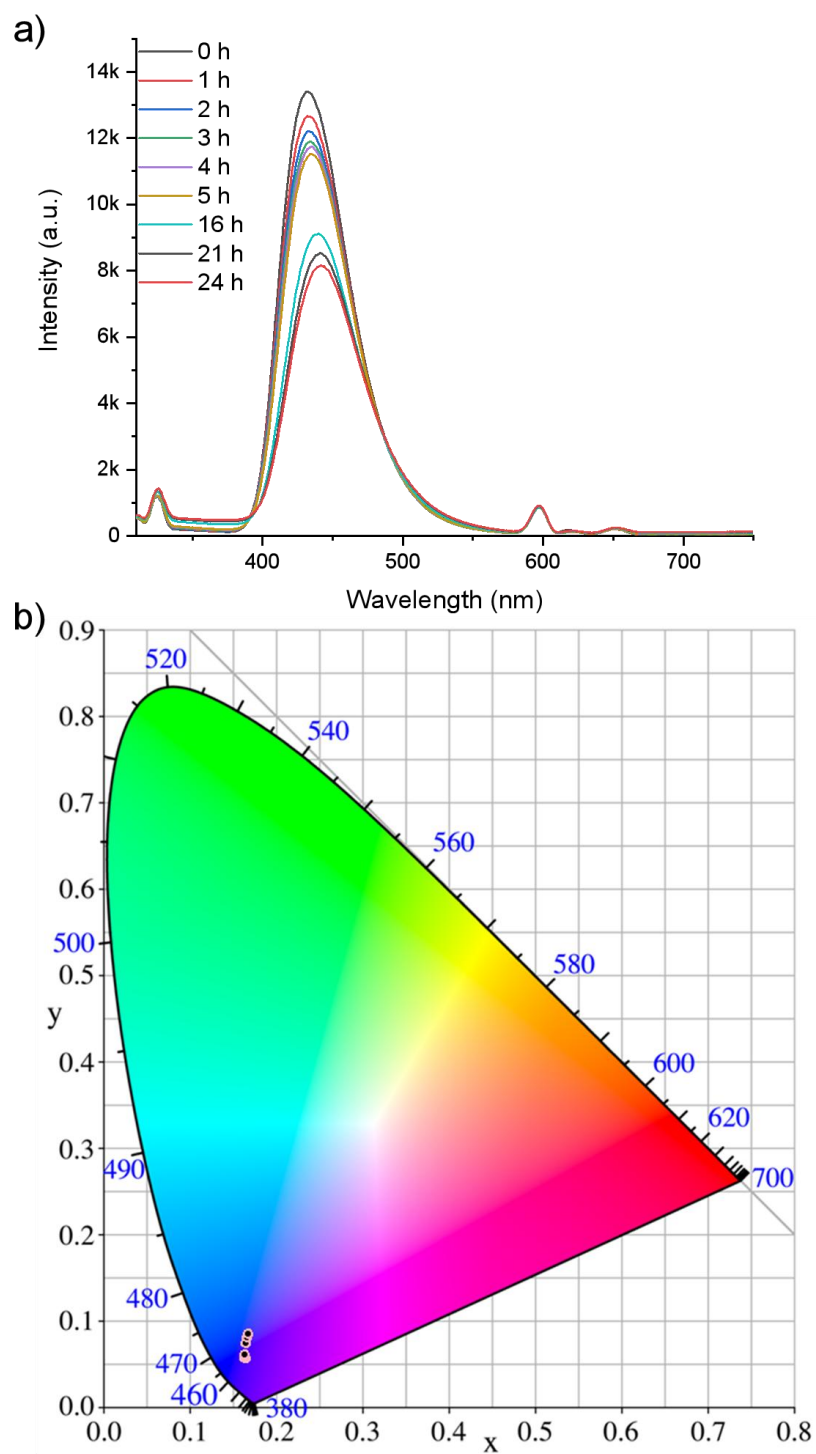

**Figure S14.** Photostability of Coumarin 1 (0.25  $\mu\text{g/mL}$ , 5  $\mu\text{L}$  of 0.1  $\text{mg/mL}$  stock solution in 2 mL DMF) under 365 nm irradiation for 24 hours and its corresponding (b) CIE coordinates.

a)

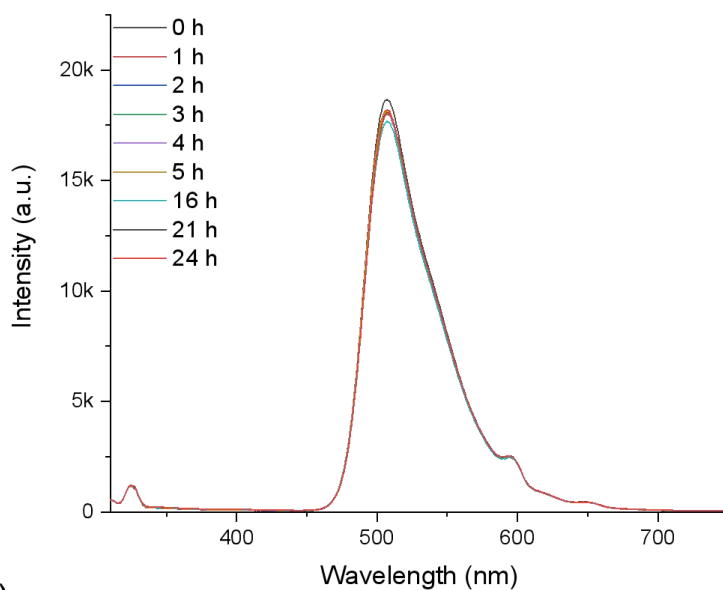

b)

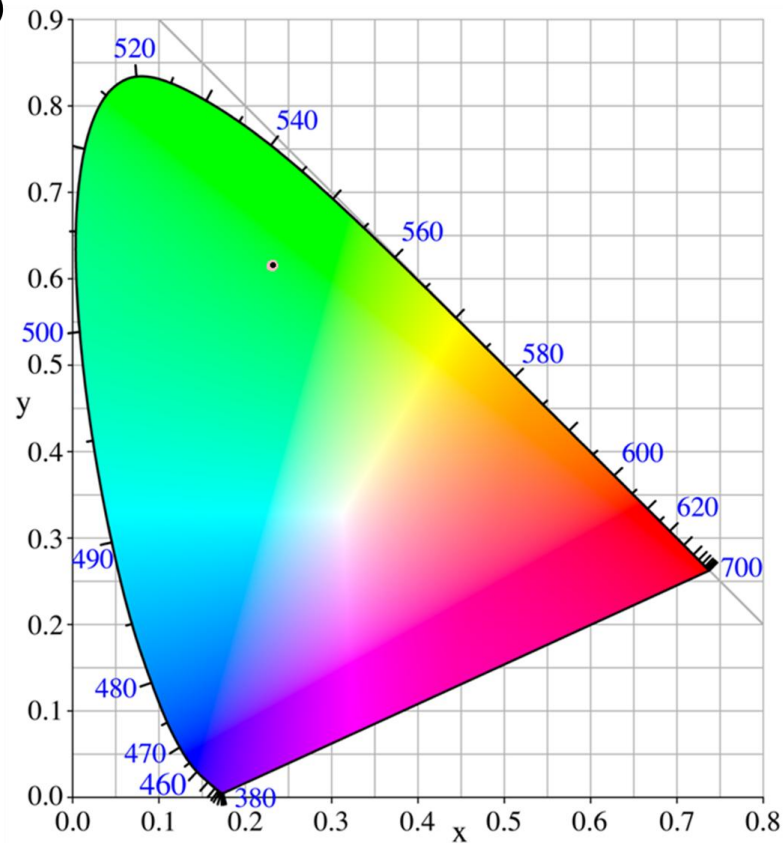

**Figure S15.** Photostability of Coumarin 6 (0.15  $\mu\text{g/mL}$ , 3  $\mu\text{L}$  of 0.1  $\text{mg/mL}$  stock solution in 2 mL DMF) under 365 nm irradiation for 24 hours and its corresponding (b) CIE coordinates.

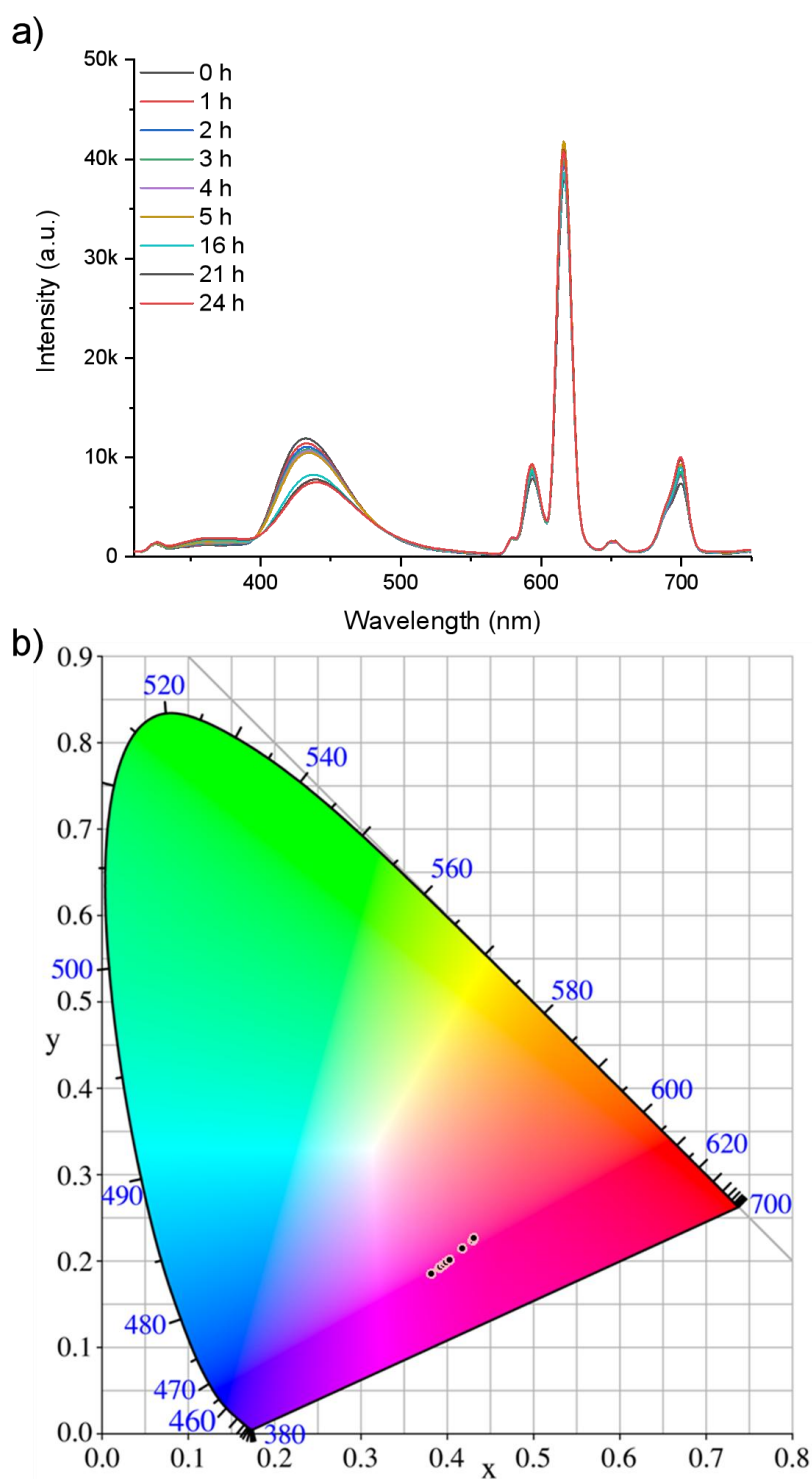

**Figure S16.** Photostability of Eu-P6MOF-C1 (Eu-P6MOF: 0.1 mg/mL suspension in DMF, 2 mL; C1: 0.1 mg/mL, 5  $\mu$ L added thereto) under 365 nm irradiation for 24 hours and its corresponding (b) CIE coordinates.

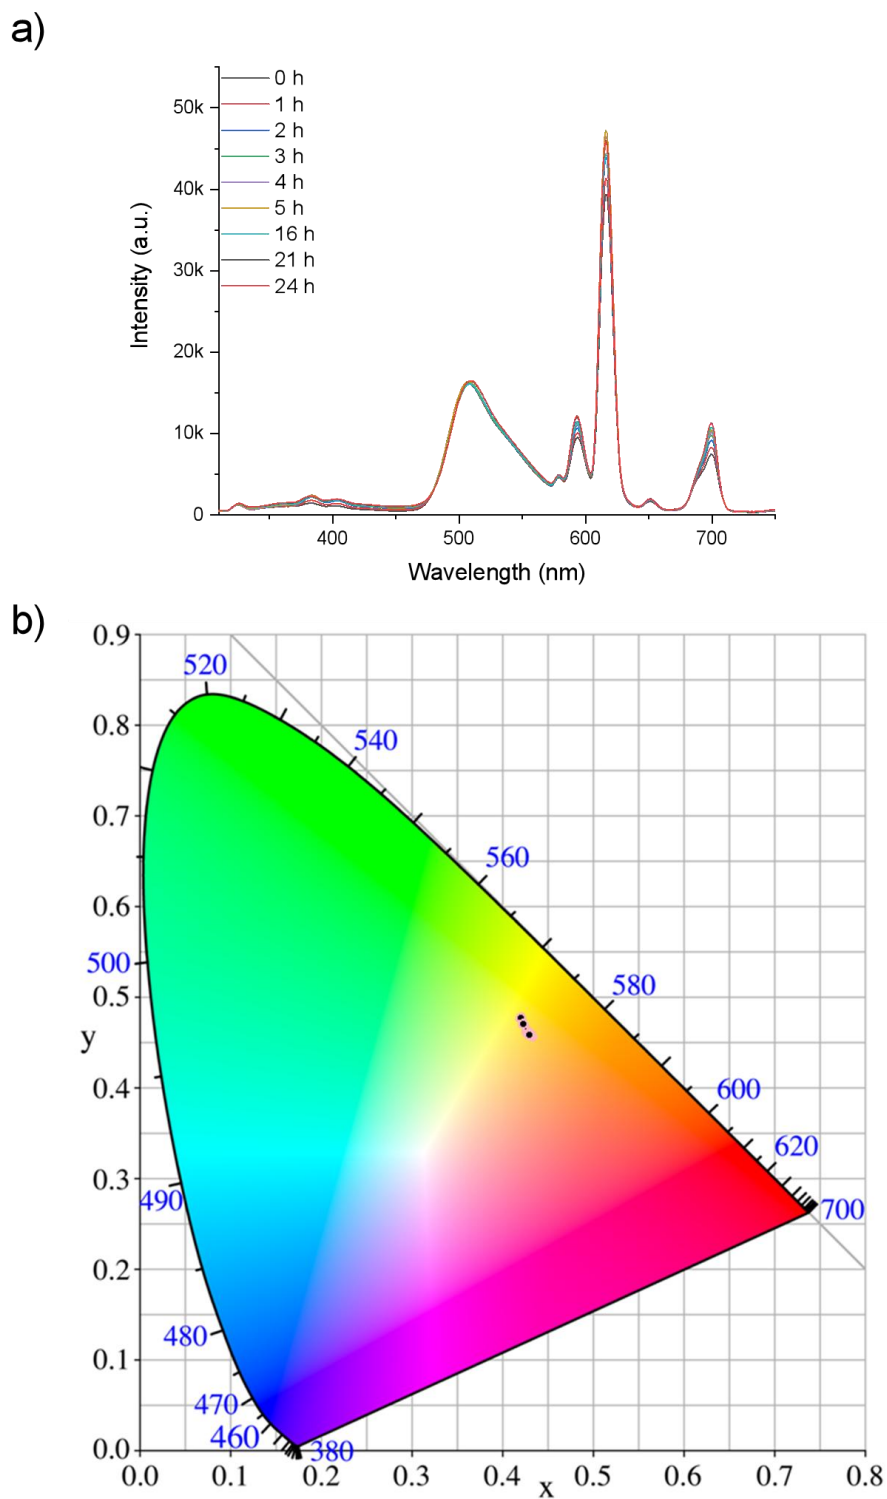

**Figure S17.** Photostability of **Eu-P6MOF-C6** (**Eu-P6MOF**: 0.1 mg/mL suspension in DMF, 2 mL; **C6**: 0.1 mg/mL, 3  $\mu$ L added thereto) under 365 nm irradiation for 24 hours and its corresponding (b) CIE coordinates.

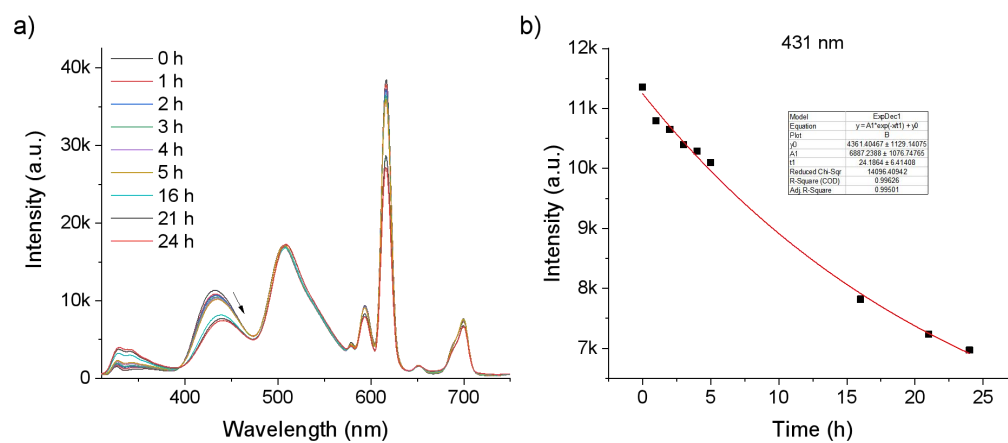

**Figure S18.** (a) Photostability test of the **Eu-P6MOF-C6-C1** composite under continuous irradiation. (b) Time-dependent fluorescence decay at 431 nm with single-exponential fitting (ExpDec1), affording a photodegradation rate constant  $k = 0.041 \text{ h}^{-1}$  and a half-life  $t_{1/2} = 16.63 \text{ h}$ .

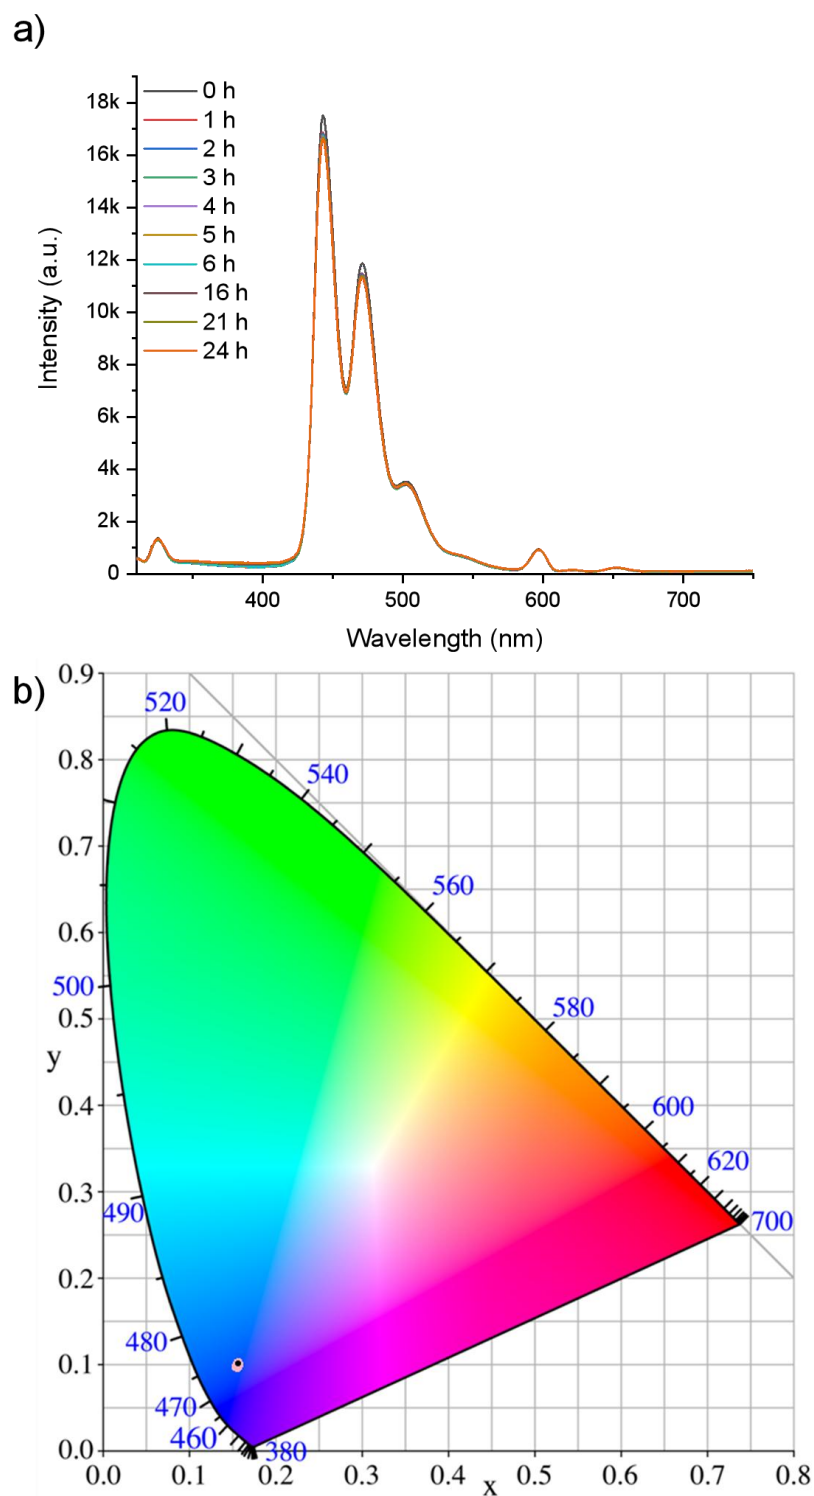

**Figure S19.** Photostability of Perylene (0.525  $\mu\text{g/mL}$ , 10.5  $\mu\text{L}$  of 0.1  $\text{mg/mL}$  stock solution in 2 mL DMF) under 365 nm irradiation for 24 hours and its corresponding (b) CIE coordinates.

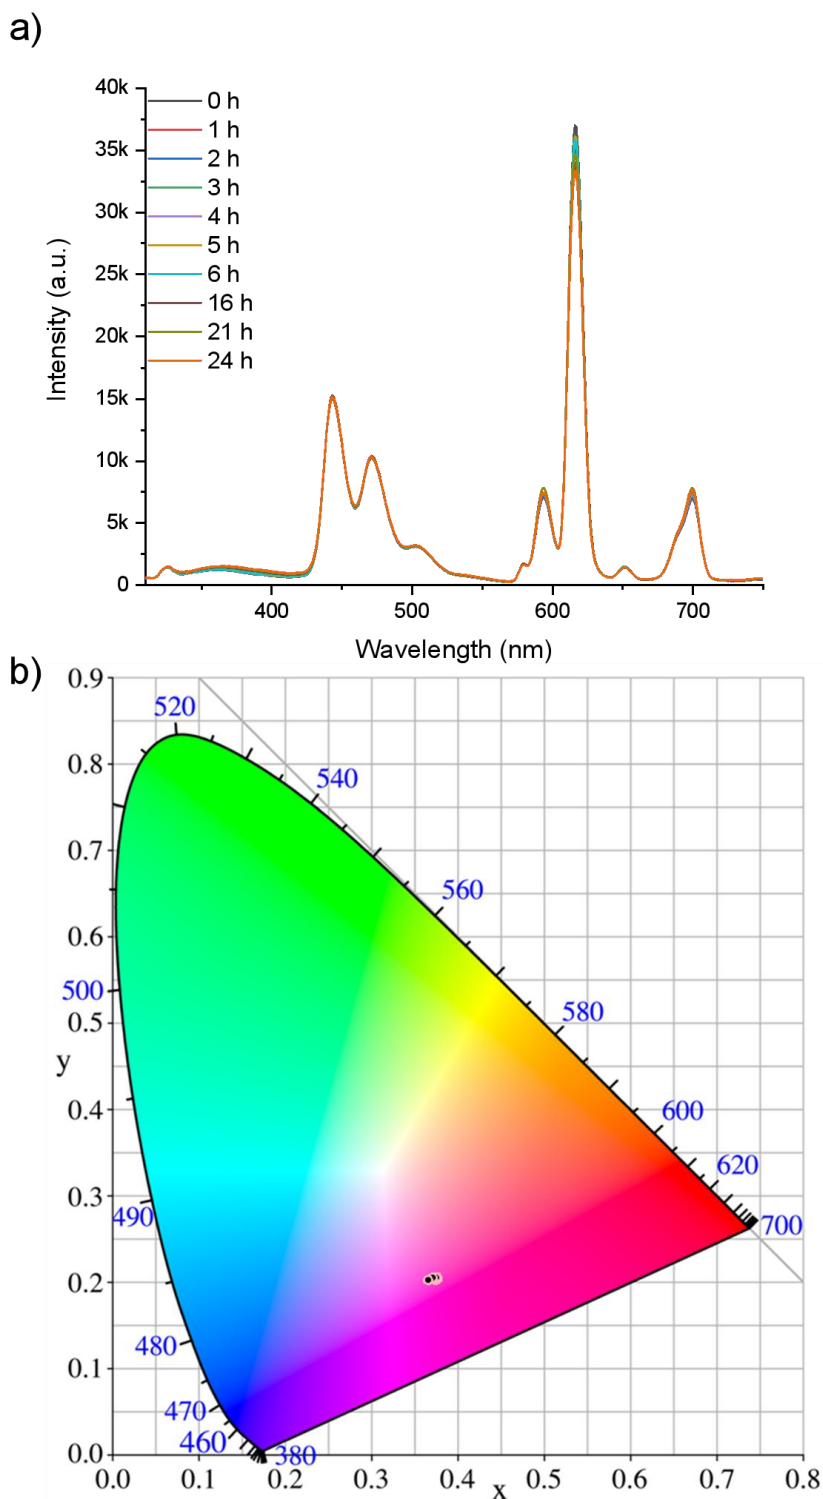

**Figure S20.** Photostability of Eu-P6MOF-Perylene (Eu-P6MOF: 0.1 mg/mL suspension in DMF, 2 mL; Perylene: 0.1 mg/mL, 10.5  $\mu$ L added thereto) under 365 nm irradiation for 24 hours and its corresponding (b) CIE coordinates.

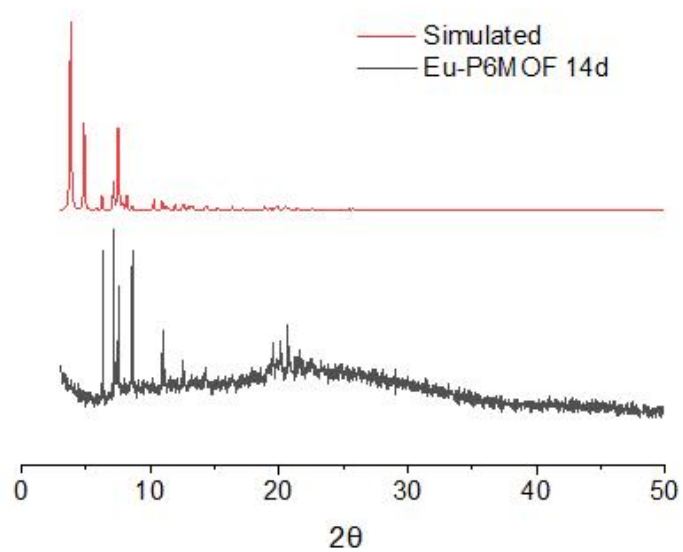

**Figure S21.** PXRD pattern of **Eu-P6MOF** recovered from the **Eu-P6MOF-C6-Perylene** white-light system in DMF after 14 days of storage.

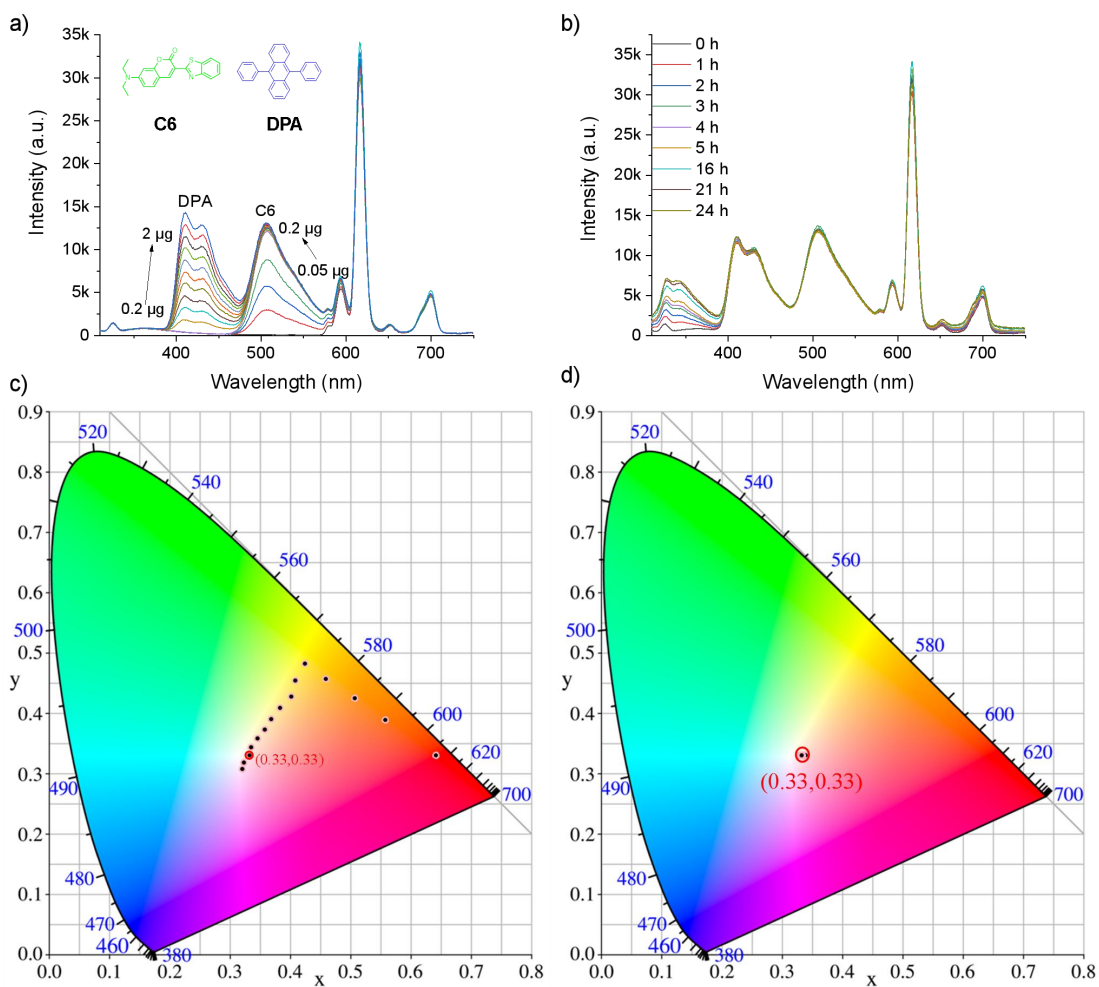

**Figure S22.** White-light tuning and photostability evaluation of host-guest composites. (a-d) In DMF: (a) Emission spectra demonstrating white-light tuning upon sequential addition of C6 and DPA to **Eu-P6MOF**. (b) Photostability test of the resulting **Eu-P6MOF-C6-DPA** composite under prolonged illumination. (c-d) Corresponding CIE 1931 chromaticity diagrams for (a-b), respectively.

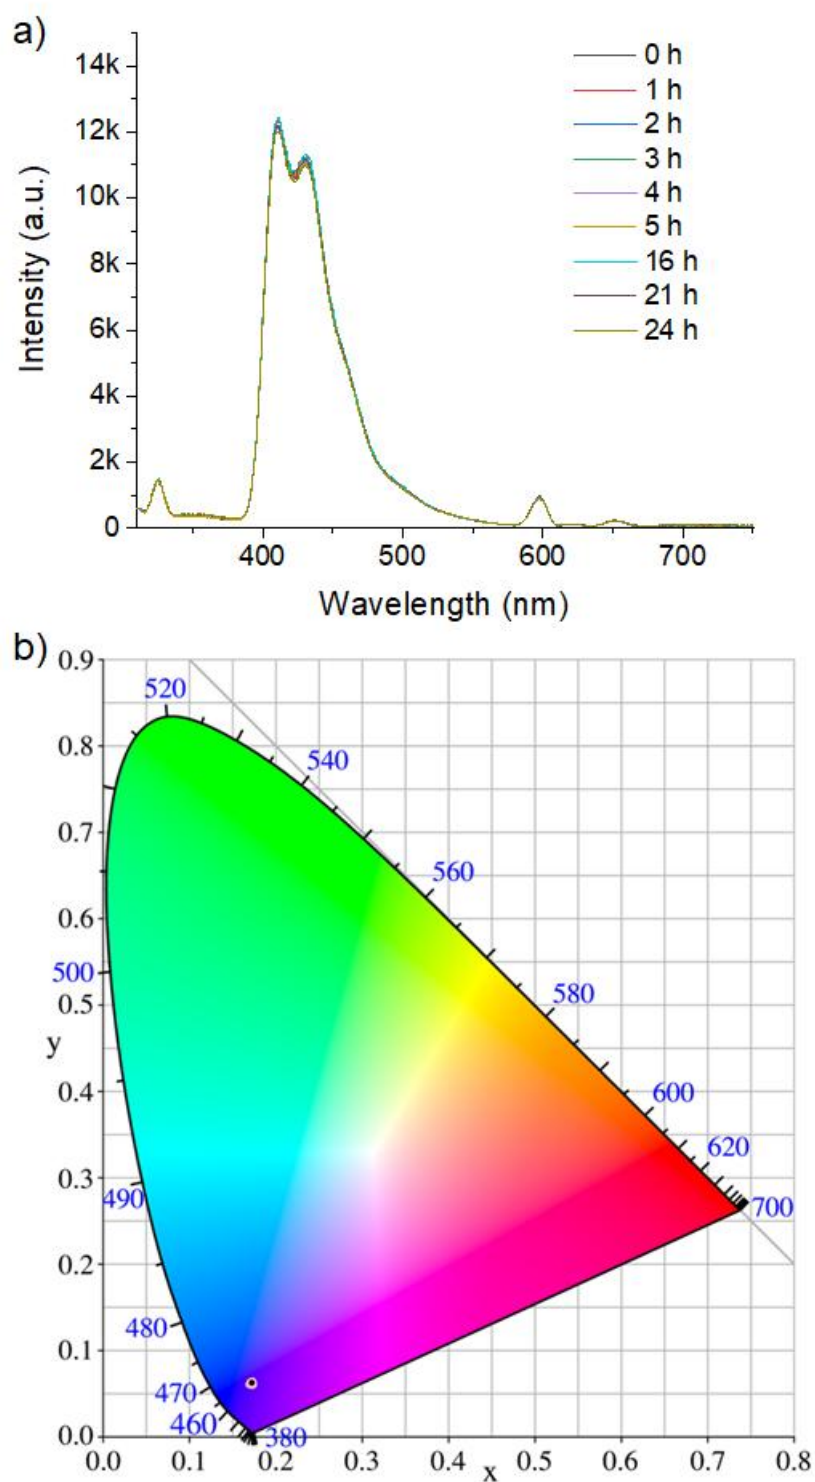

**Figure S23.** Photostability of DPA (0.8  $\mu\text{g/mL}$ , 16  $\mu\text{L}$  of 0.1 mg/mL stock solution in 2 mL DMF) under 365 nm irradiation for 24 hours and its corresponding (b) CIE coordinates.

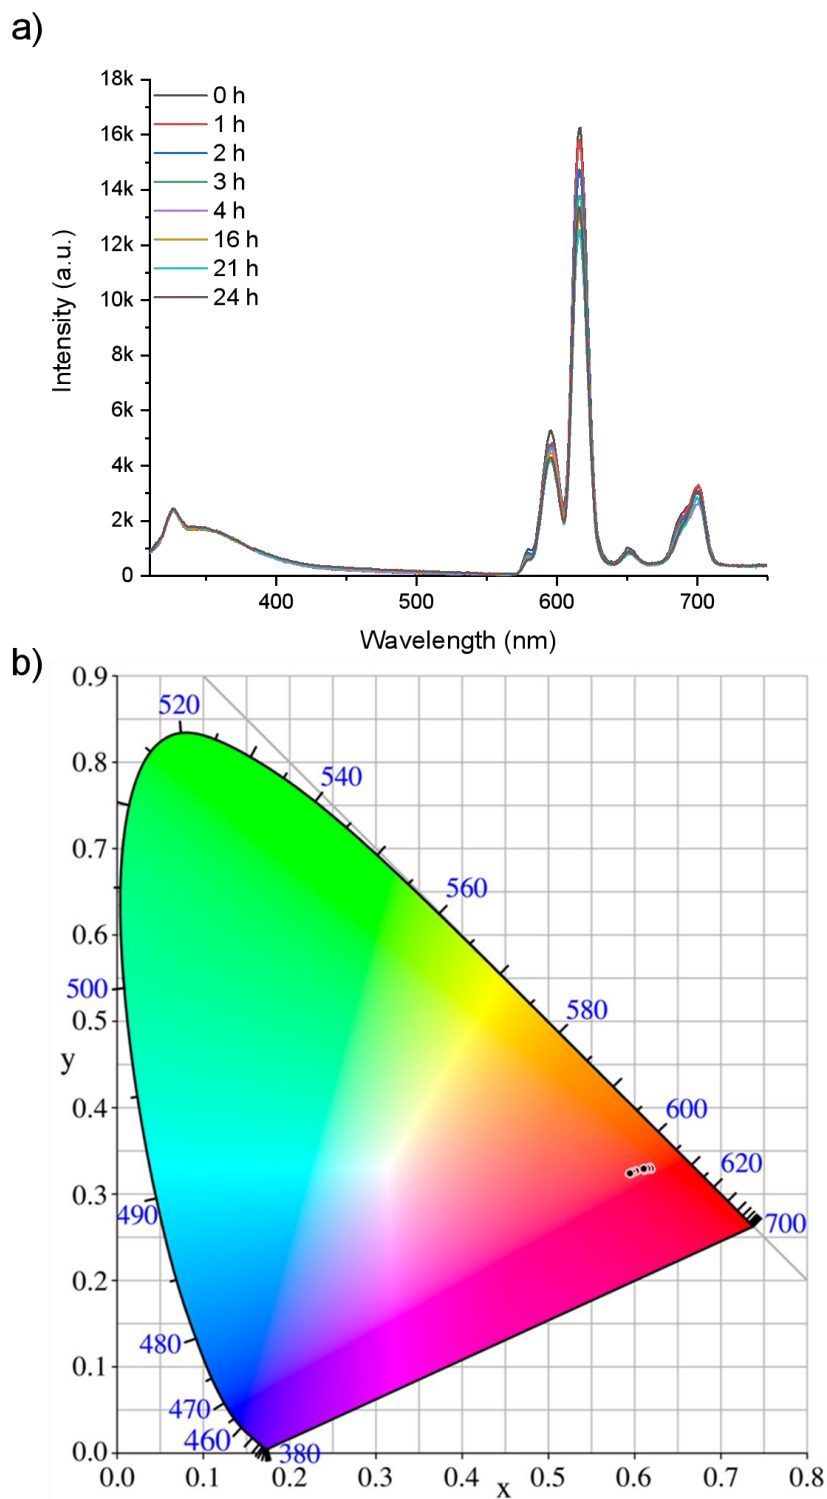

**Figure S24.** Photostability of **Eu-P6MOF** suspension (0.1 mg/mL, prepared by sonication in EtOH for 3 hours, 2 mL aliquot) under 365 nm irradiation for 24 hours and its corresponding (b) CIE coordinates.

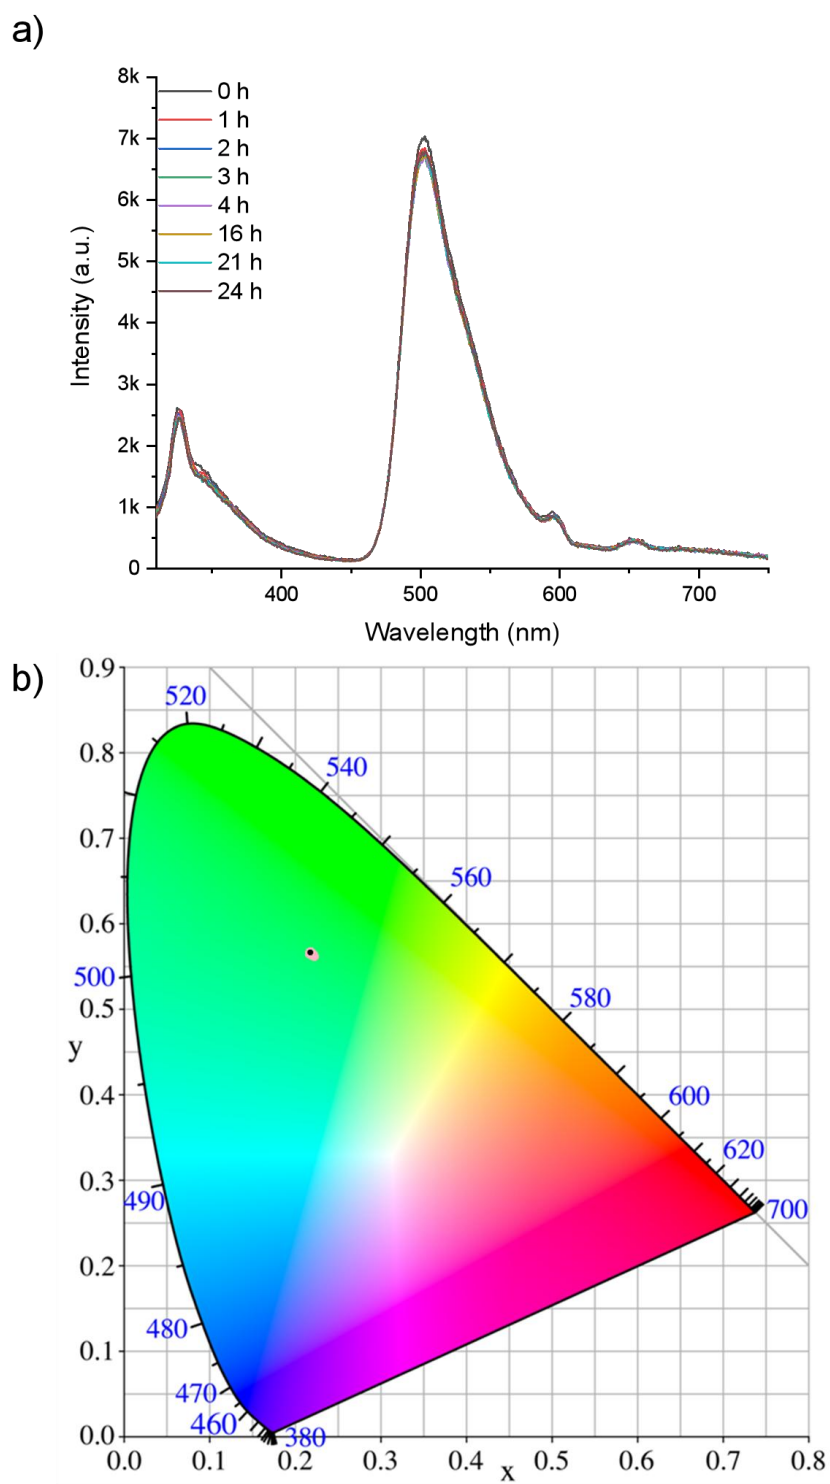

**Figure S25.** Photostability of **Coumarin6** ( $0.0425 \mu\text{g/mL}$ ,  $8.5 \mu\text{L}$  of  $0.01 \text{ mg/mL}$  stock solution in  $2 \text{ mL EtOH}$ ) under  $365 \text{ nm}$  irradiation for 24 hours and its corresponding (b) CIE coordinates.

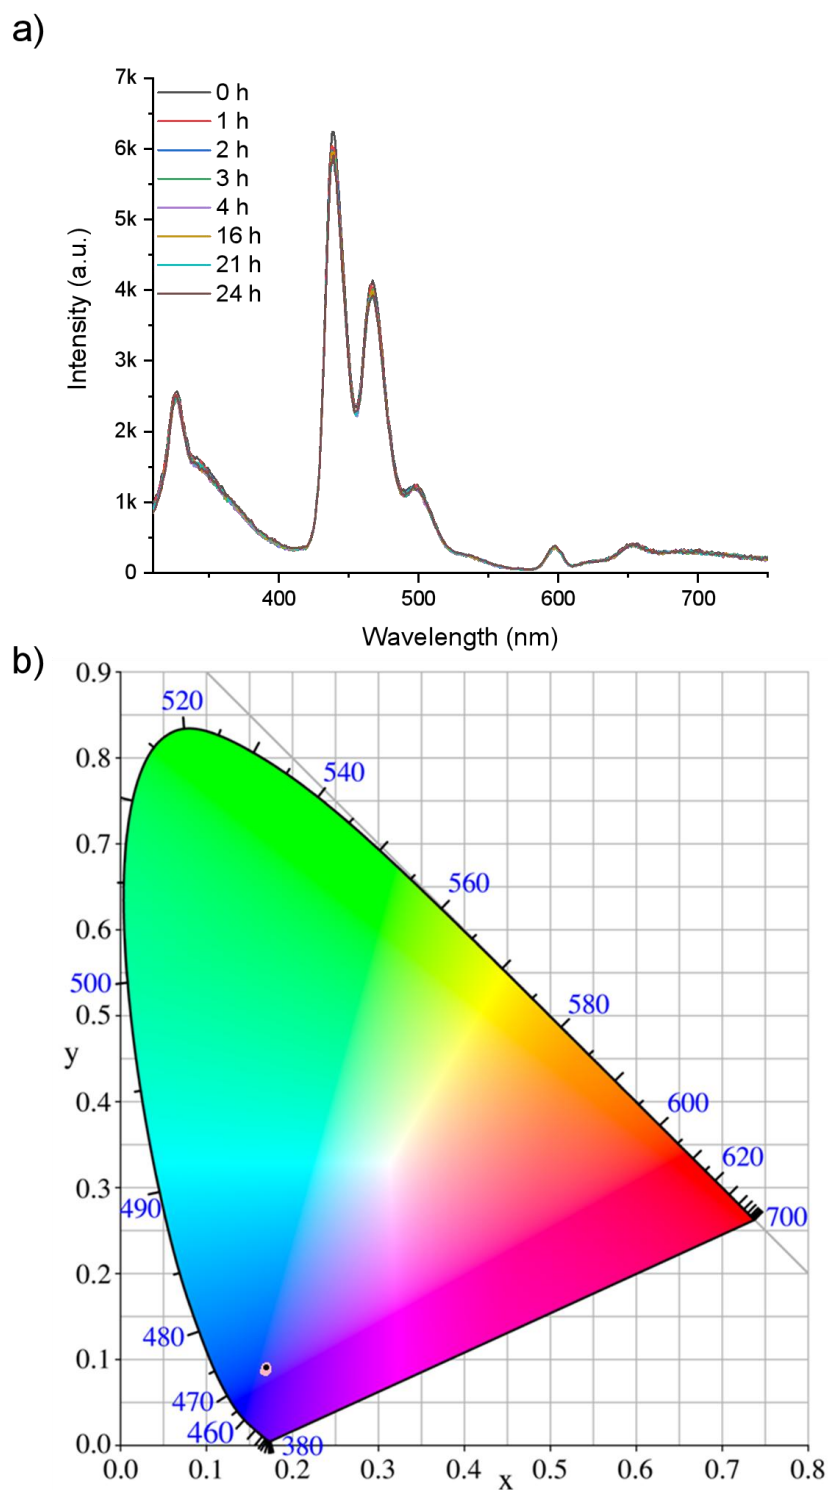

**Figure S26.** Photostability of **Perylene** (0.15  $\mu\text{g/mL}$ , 30  $\mu\text{L}$  of 0.01  $\text{mg/mL}$  stock solution in 2 mL EtOH) under 365 nm irradiation for 24 hours and its corresponding (b) CIE coordinates.

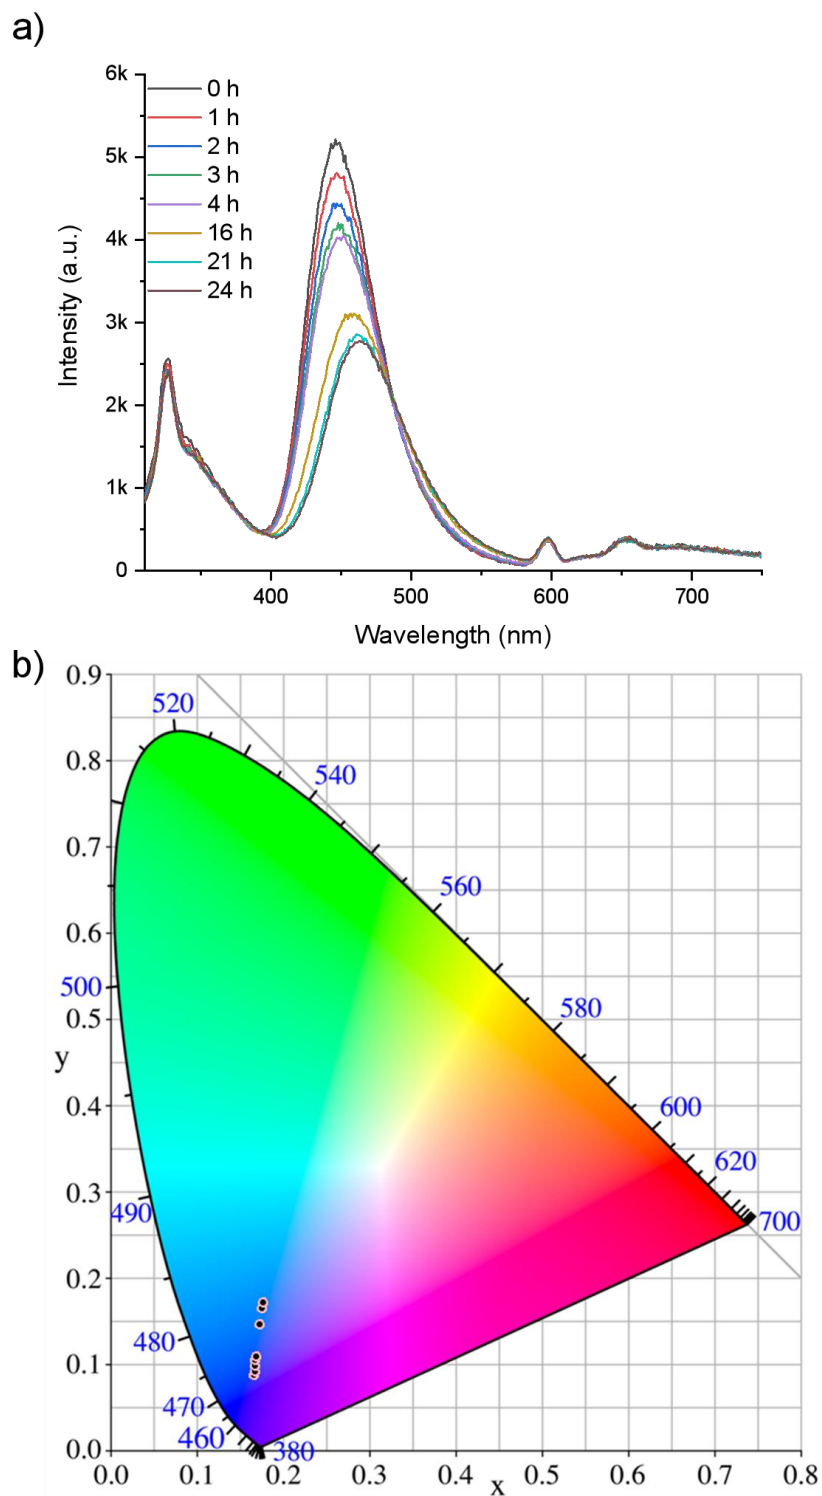

**Figure S27.** Photostability of **Coumarin1** ( $0.07 \mu\text{g/mL}$ ,  $14 \mu\text{L}$  of  $0.01 \text{ mg/mL}$  stock solution in  $2 \text{ mL EtOH}$ ) under  $365 \text{ nm}$  irradiation for 24 hours and its corresponding (b) CIE coordinates.

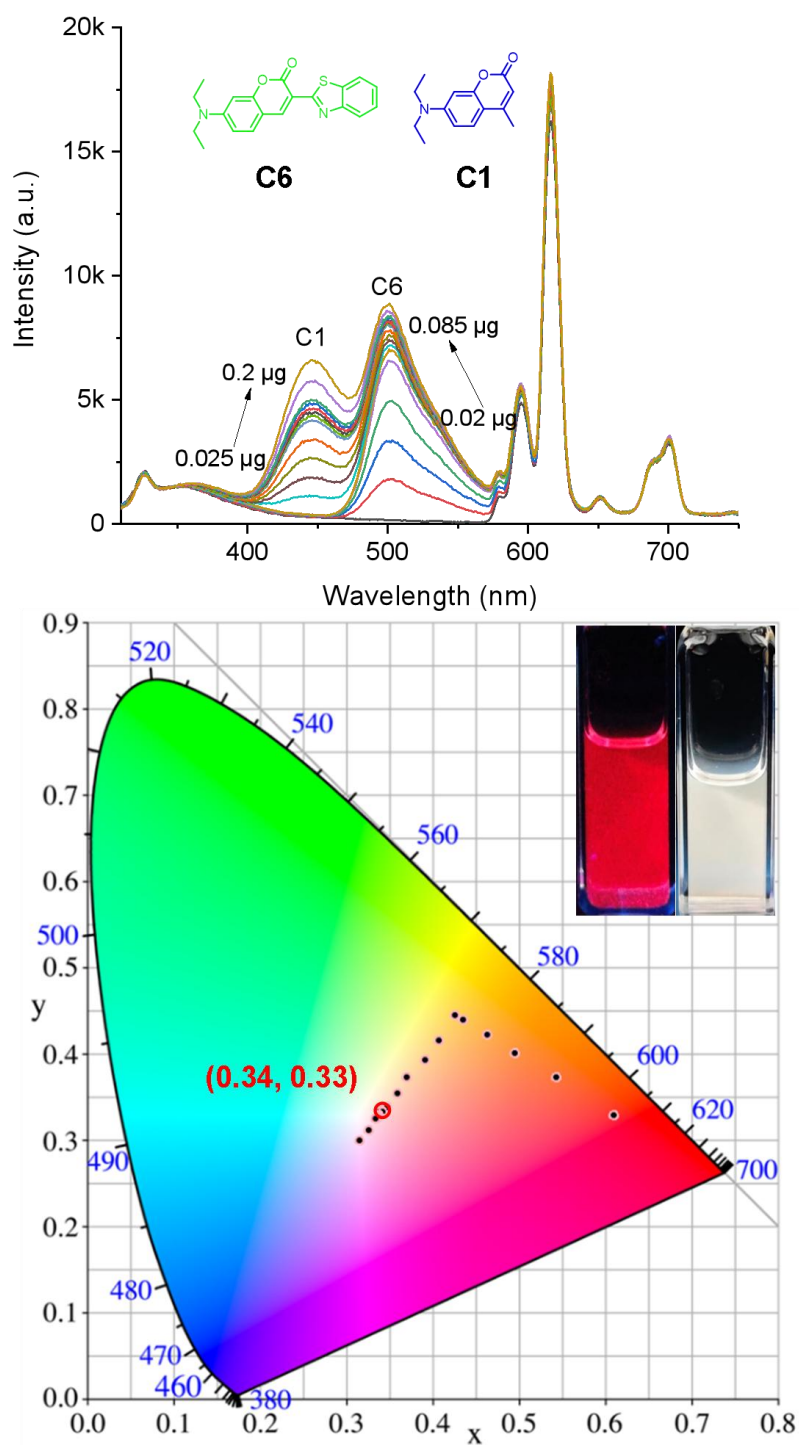

**Figure S28.** (a) White-light tuning of the unstable C1-based system in EtOH and its corresponding (b) CIE coordinates.

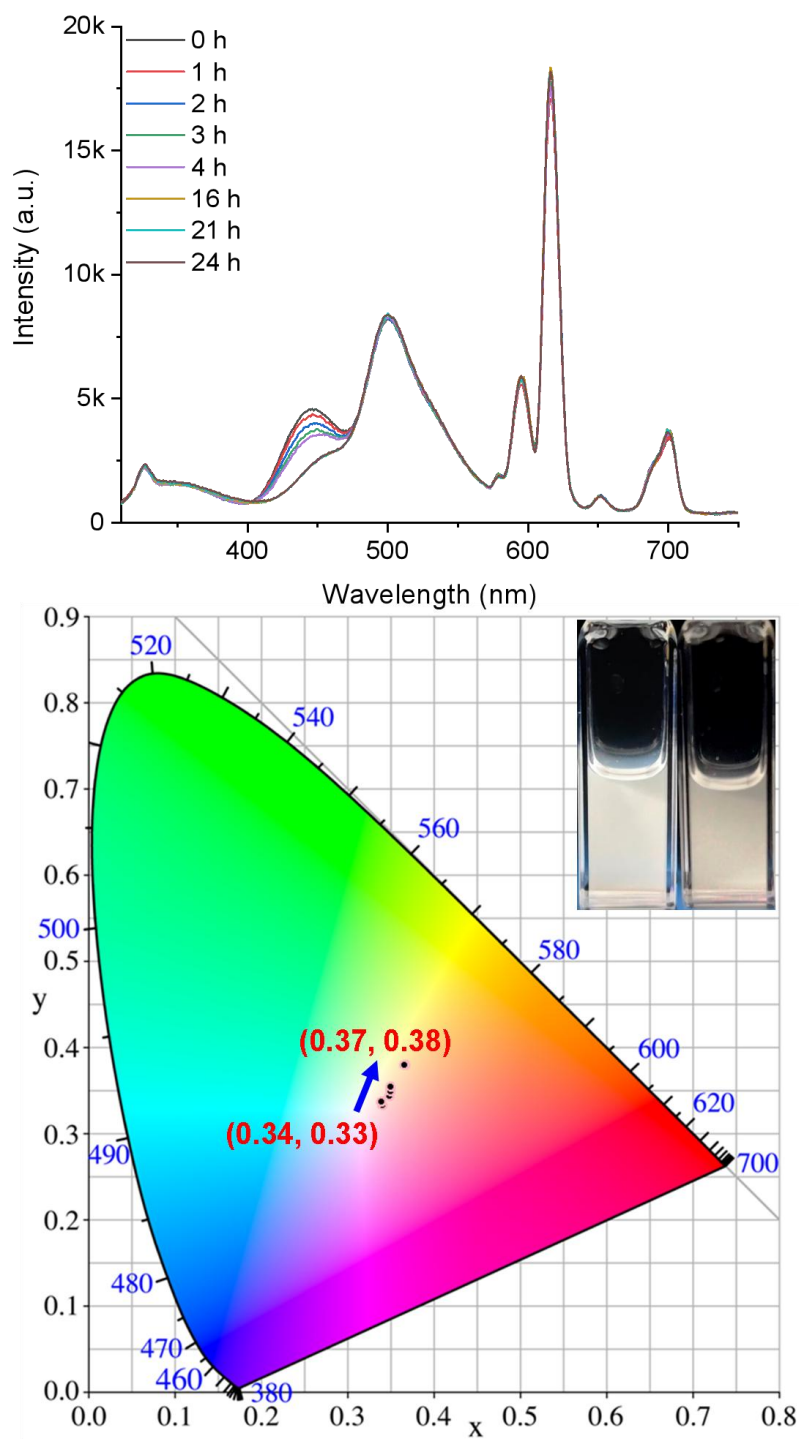

**Figure S29.** Photostability of Eu-P6MOF-C6-C1 (Eu-P6MOF: 0.1 mg/mL suspension in EtOH, 2 mL; C6: 0.01 mg/mL, 8.5  $\mu$ L added thereto; C1: 0.01 mg/mL, 14  $\mu$ L added thereto) under 365 nm irradiation for 24 hours and its corresponding (b) CIE coordinates.

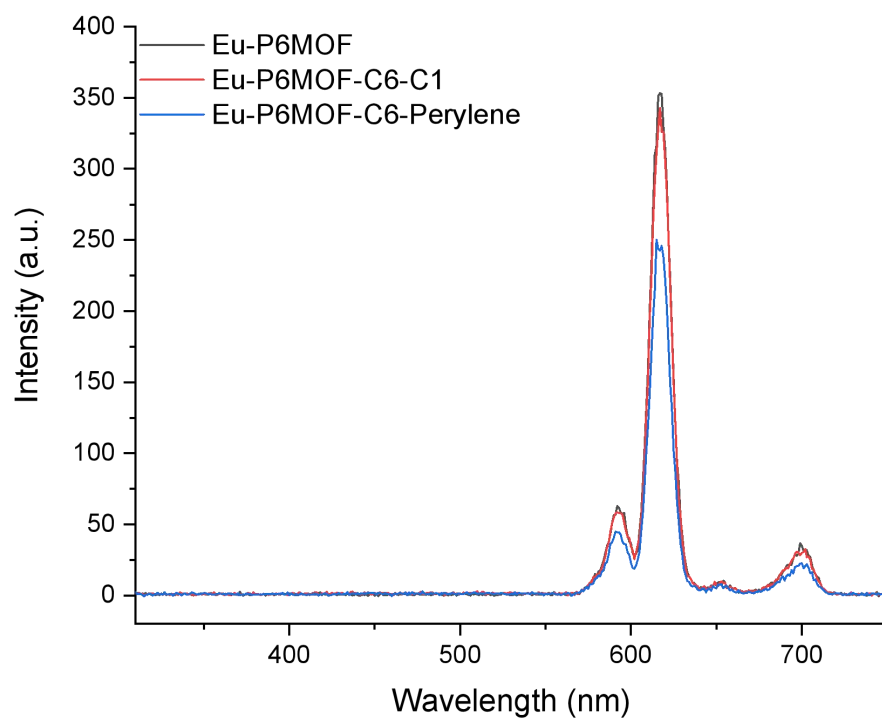

**Figure S30.** Phosphorescence Experiments for the suspension in DMF of **Eu-P6MOF** (1mg/10mL); **Eu-P6MOF-C6-C1**; **Eu-P6MOF-C6-Perylene**.

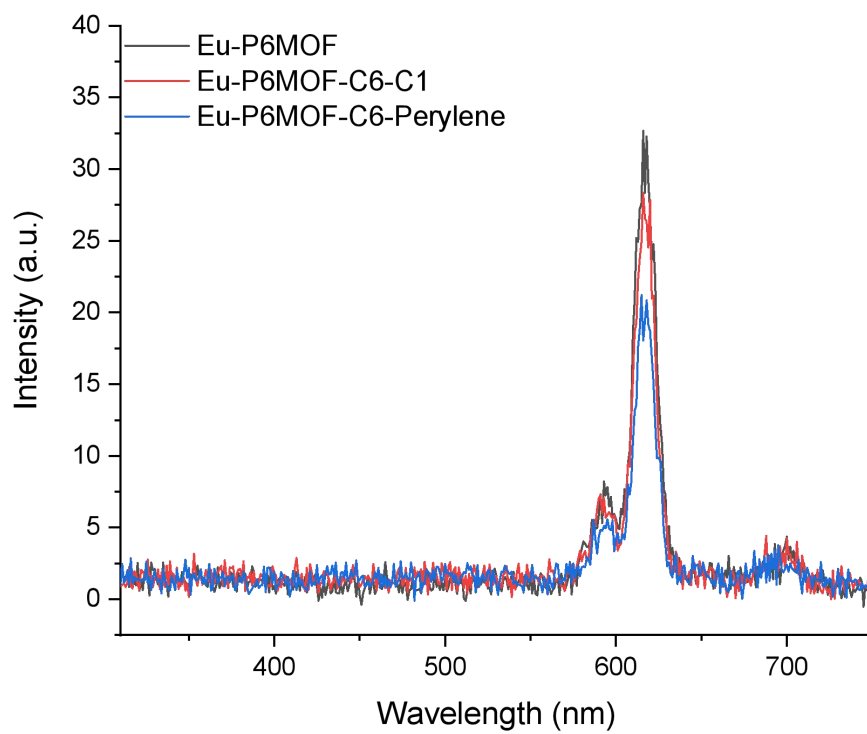

**Figure S31.** Phosphorescence Experiments for the suspension in EtOH of **Eu-P6MOF** (1mg/10mL); **Eu-P6MOF-C6-C1**; **Eu-P6MOF-C6-Perylene**.

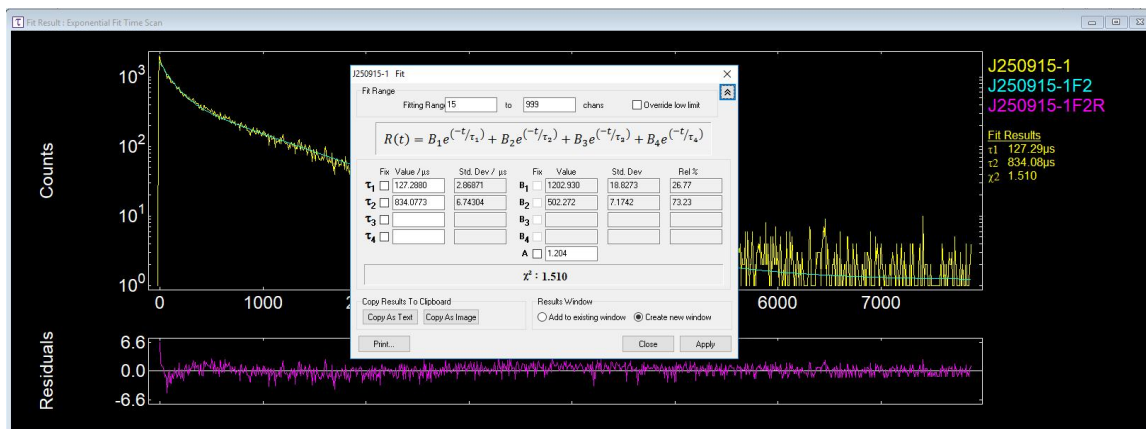

**Figure S32.** Fluorescence lifetime of Eu-P6MOF suspension (1 mg in 10 mL DMF) measured using a 375-nm Microsecond Flashlamp.

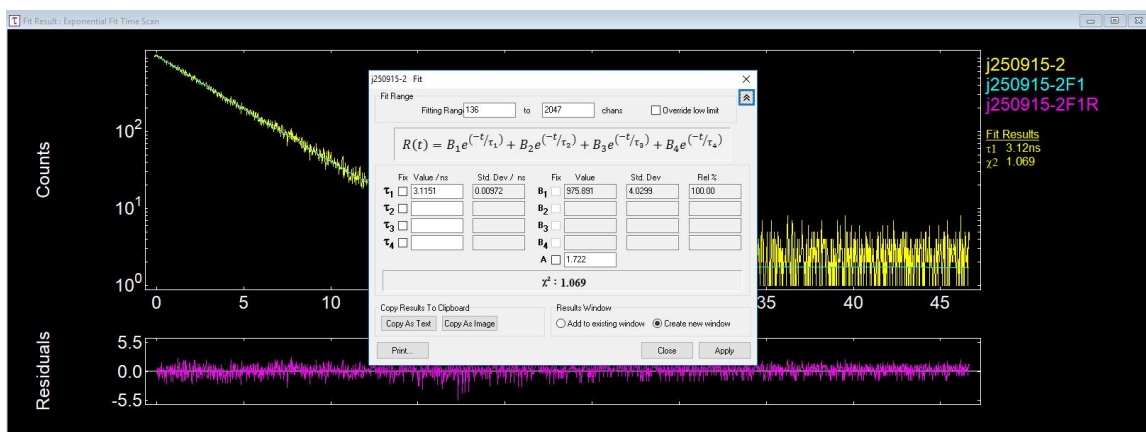

**Figure S33.** Fluorescence lifetime of Coumarin 1 (0.25  $\mu\text{g/mL}$ , 5  $\mu\text{L}$  of 0.1 mg/mL stock solution in 2 mL DMF) measured using a 375-nm Laser.

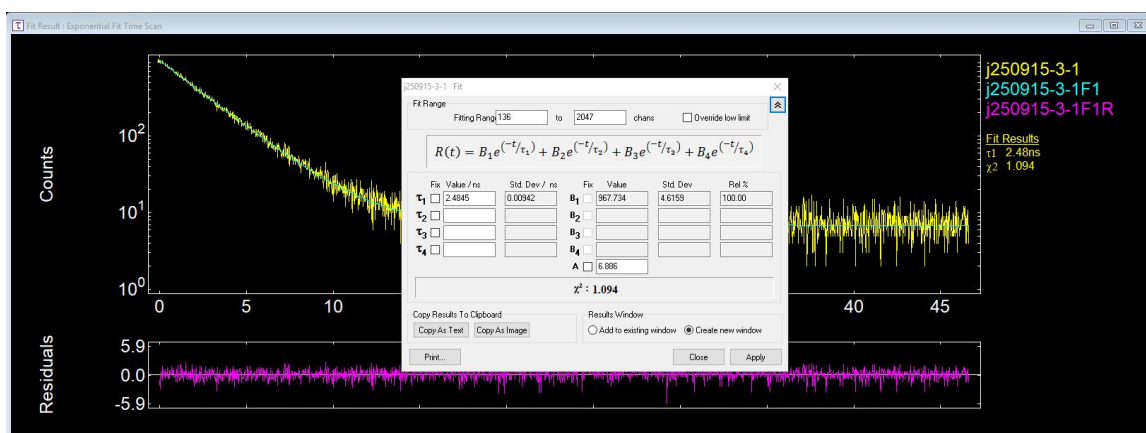

**Figure S34.** Fluorescence lifetime of Coumarin 6 (0.15  $\mu\text{g/mL}$ , 3  $\mu\text{L}$  of 0.1 mg/mL stock solution in 2 mL DMF) measured using a 450-nm Laser.

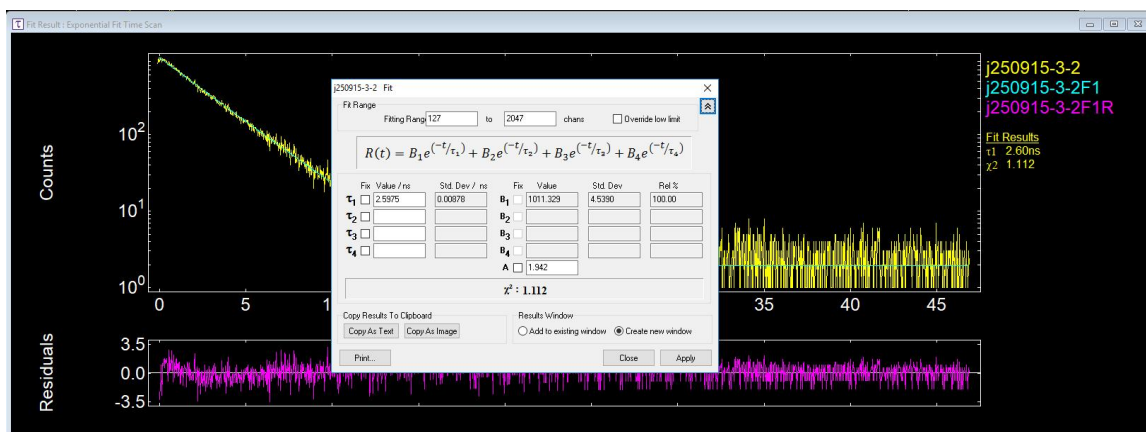

**Figure S35.** Fluorescence lifetime of Coumarin 6 (0.15  $\mu\text{g/mL}$ , 3  $\mu\text{L}$  of 0.1 mg/mL stock solution in 2 mL DMF) measured using a 375-nm Laser.

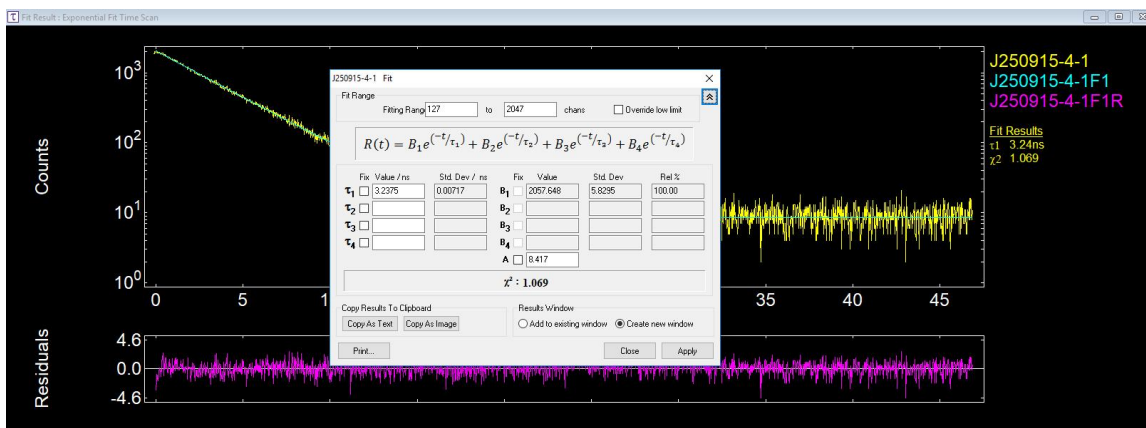

**Figure S36.** Fluorescence lifetime of Eu-P6MOF/C6/C1 system in DMF measured using a 375-nm Laser.

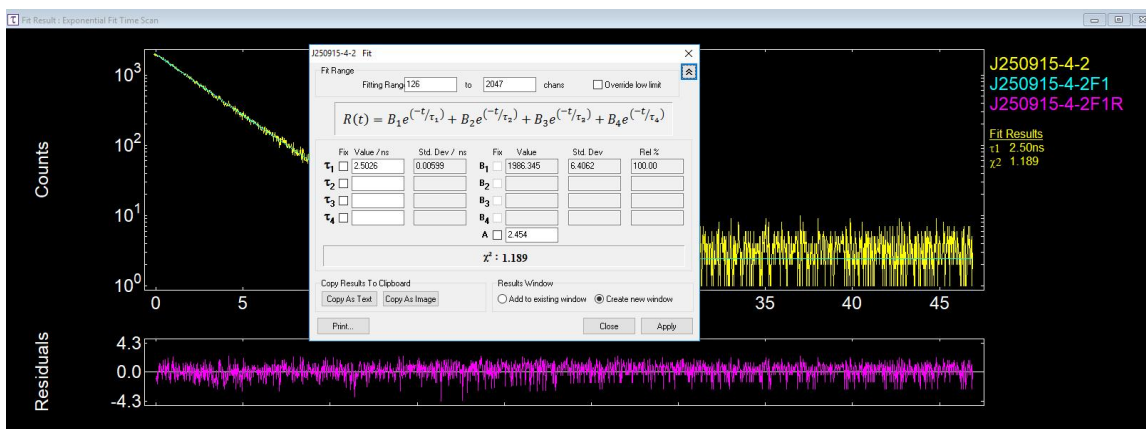

**Figure S37.** Fluorescence lifetime of Eu-P6MOF/C6/C1 system in DMF measured using a 450-nm Laser.

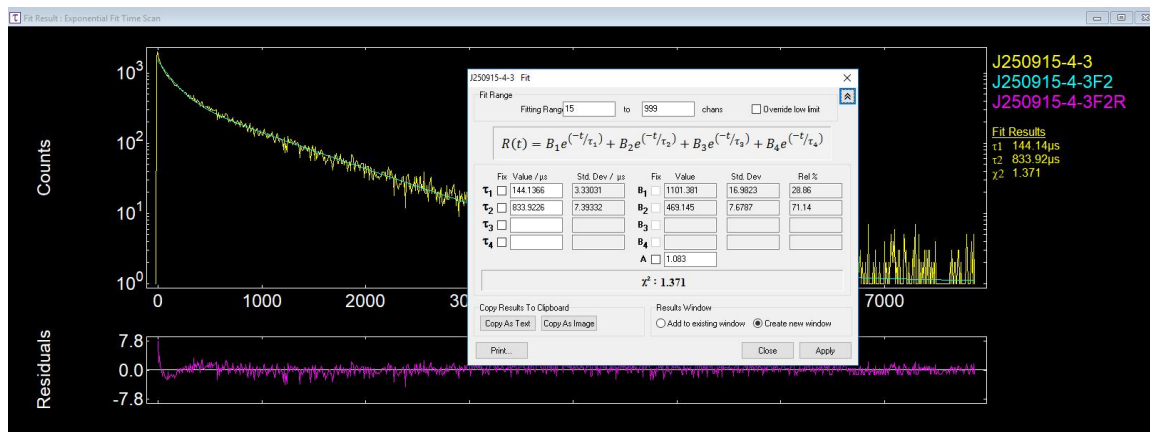

**Figure S38.** Fluorescence lifetime of Eu-P6MOF/C6/C1 system in DMF measured using a 375-nm Microsecond Flashlamp.

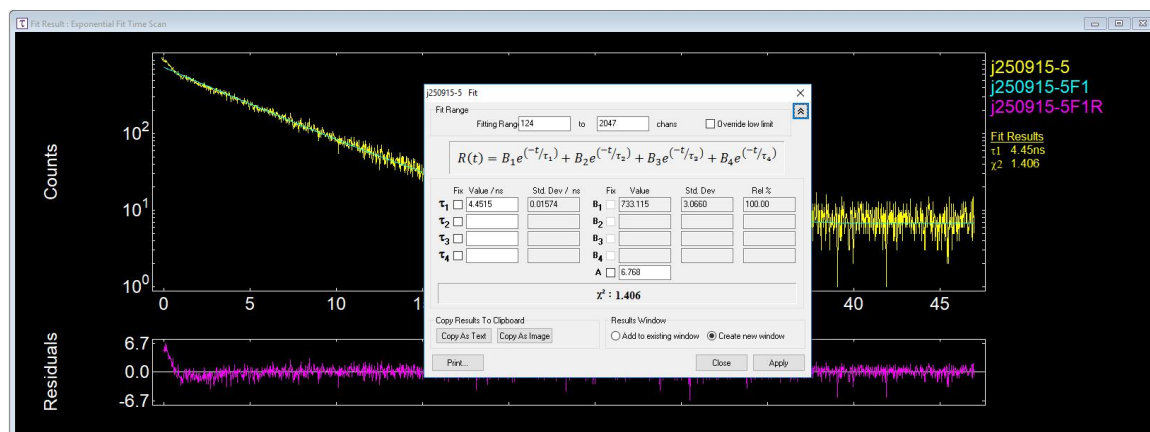

**Figure S39.** Fluorescence lifetime of Perylene (0.525  $\mu\text{g/mL}$ , 10.5  $\mu\text{L}$  of 0.1 mg/mL stock solution in 2 mL DMF) measured using a 450-nm Laser.

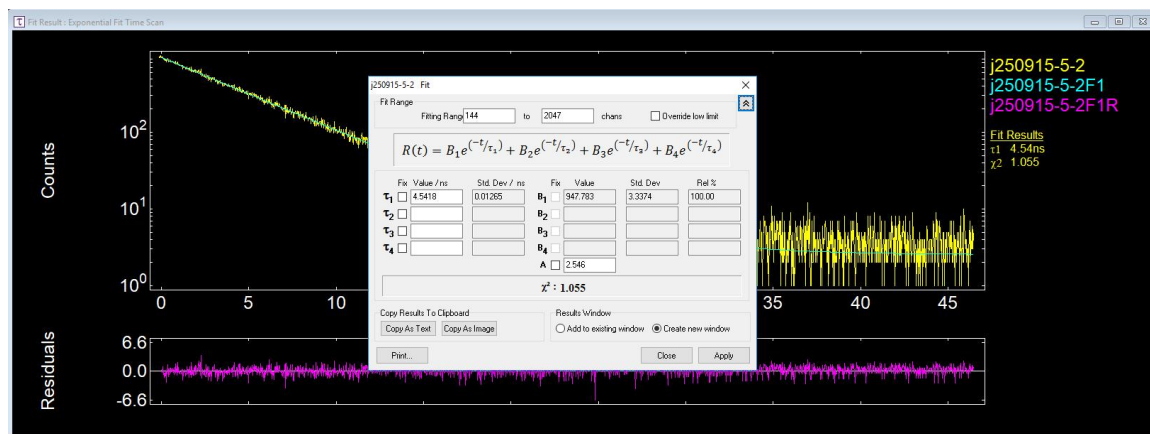

**Figure S40.** Fluorescence lifetime of Perylene (0.525  $\mu\text{g/mL}$ , 10.5  $\mu\text{L}$  of 0.1 mg/mL stock solution in 2 mL DMF) measured using a 375-nm Laser.

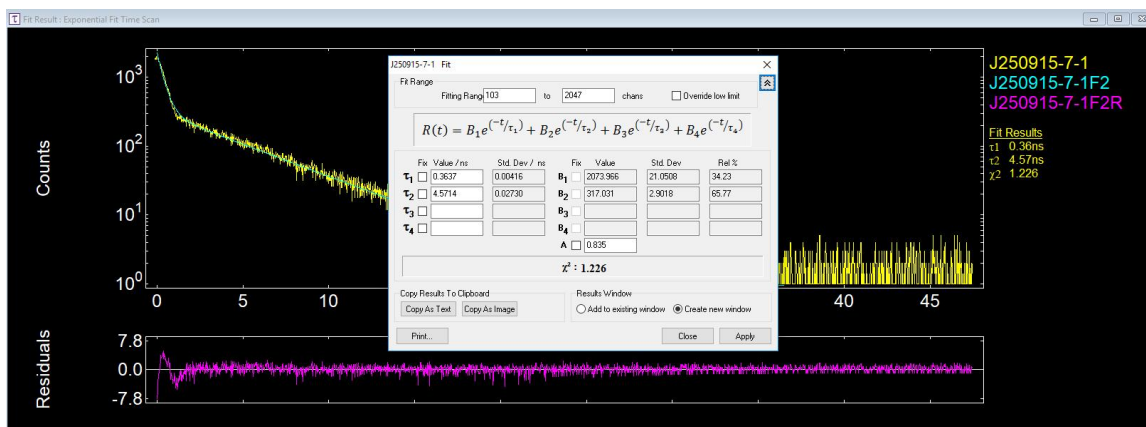

**Figure S41.** Fluorescence lifetime of **Eu-P6MOF/C6/Perylene** system in DMF measured using a 450-nm Laser.

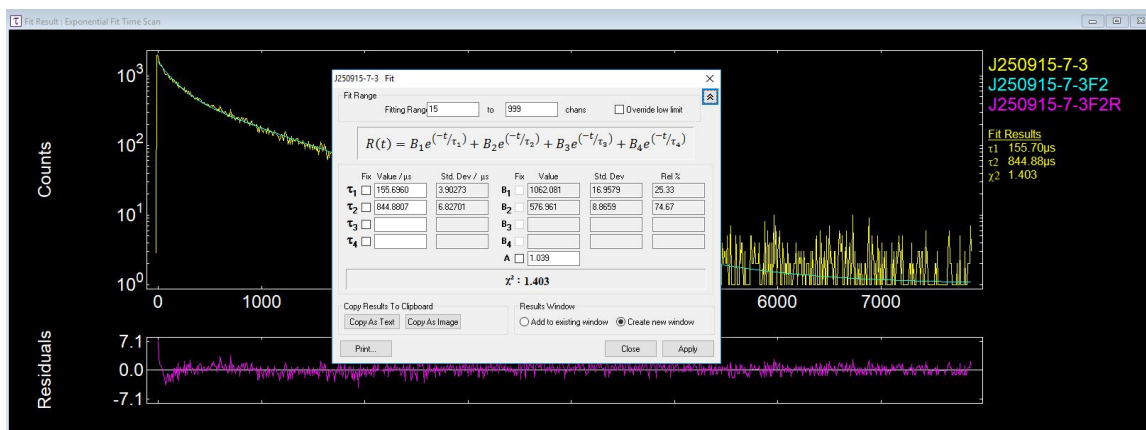

**Figure S42.** Fluorescence lifetime of **Eu-P6MOF/C6/Perylene** system in DMF measured using a 375-nm Microsecond Flashlamp.

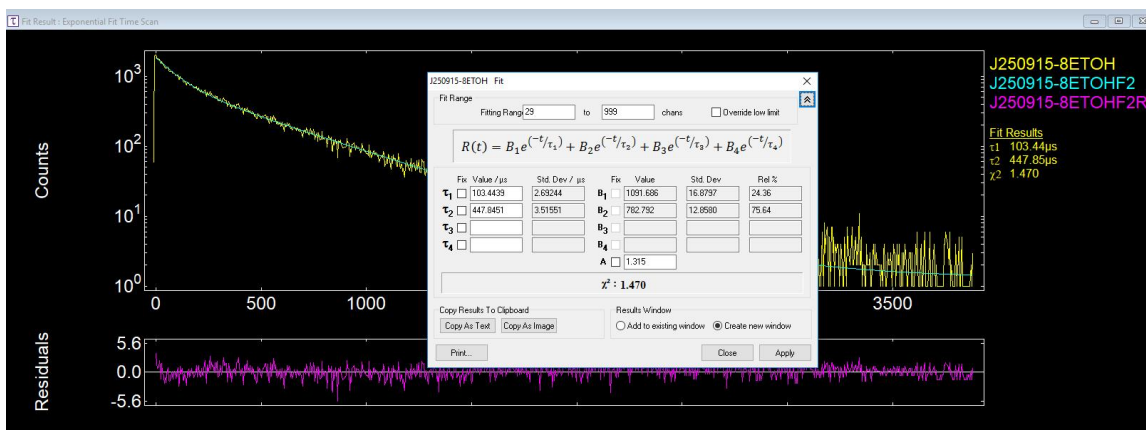

**Figure S43.** Fluorescence lifetime of **Eu-P6MOF** suspension (1 mg in 10 mL EtOH) measured using a 375-nm Microsecond Flashlamp.

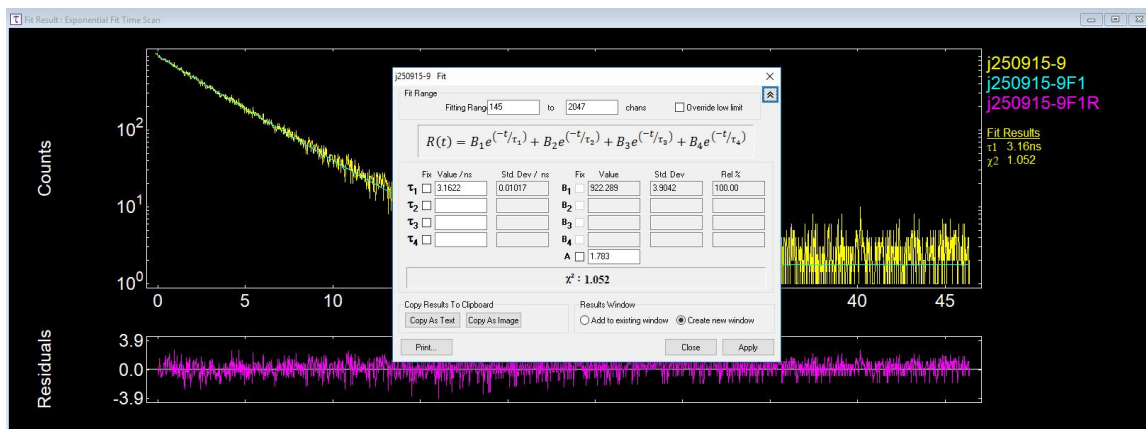

**Figure S44.** Fluorescence lifetime of Coumarin 1 (0.07  $\mu\text{g/mL}$ , 14  $\mu\text{L}$  of 0.01 mg/mL stock solution in 2 mL EtOH) measured using a 375-nm Laser.

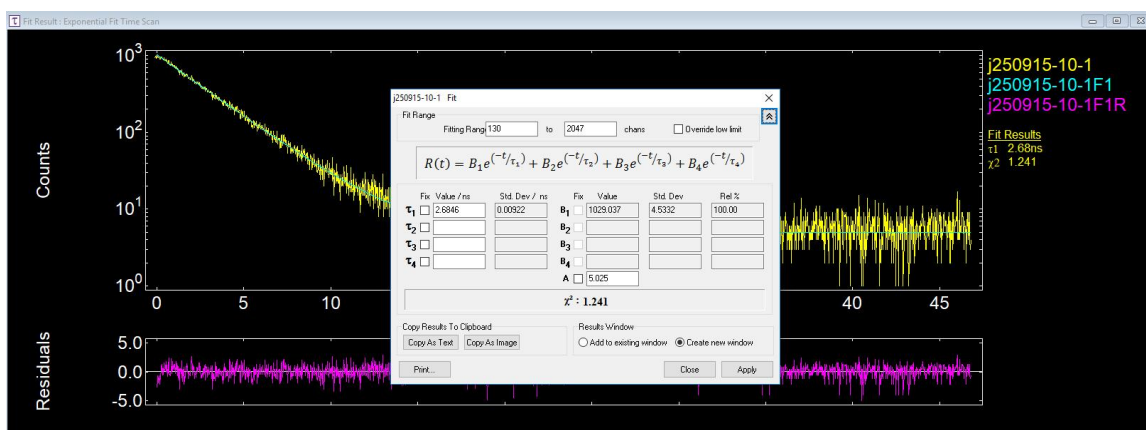

**Figure S45.** Fluorescence lifetime of Coumarin 6 (0.0425  $\mu\text{g/mL}$ , 8.5  $\mu\text{L}$  of 0.01 mg/mL stock solution in 2 mL EtOH) measured using a 450-nm Laser.

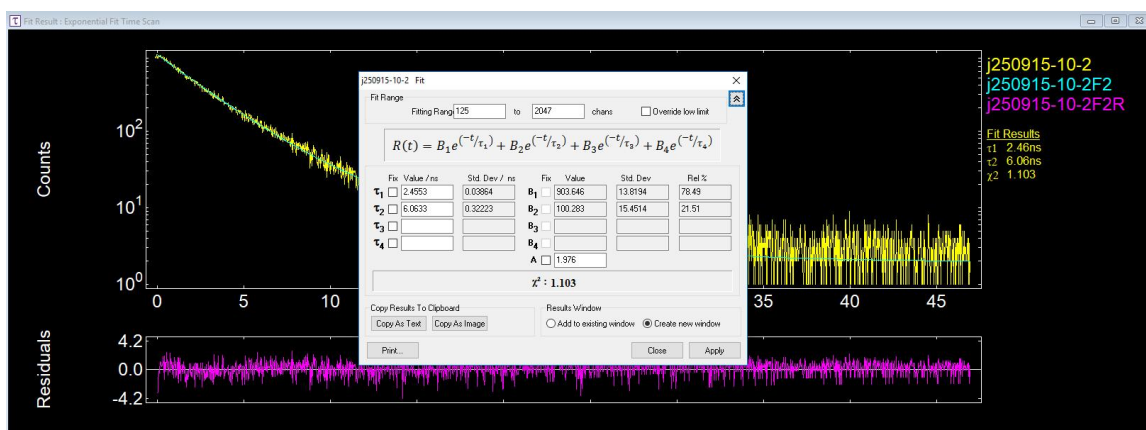

**Figure S46.** Fluorescence lifetime of Coumarin 6 (0.0425  $\mu\text{g/mL}$ , 8.5  $\mu\text{L}$  of 0.01 mg/mL stock solution in 2 mL EtOH) measured using a 375-nm Laser.

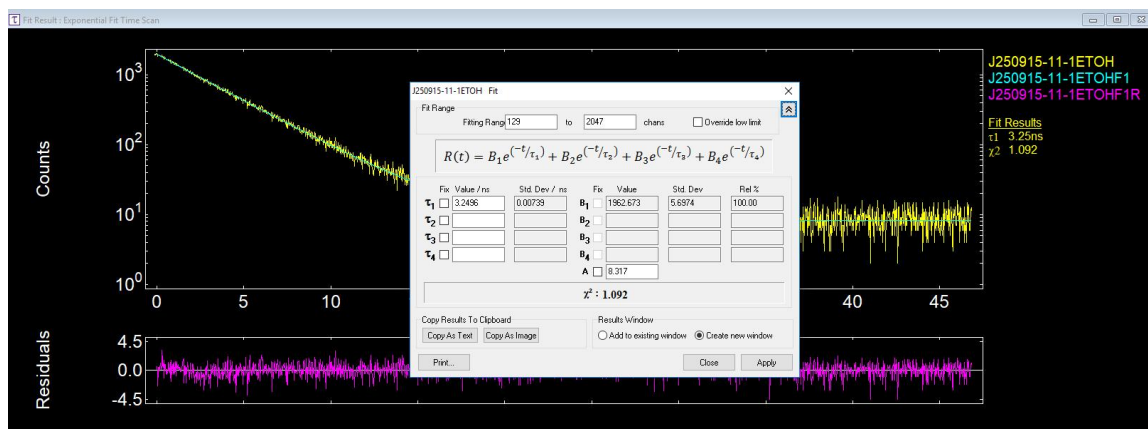

**Figure S47.** Fluorescence lifetime of Eu-P6MOF/C6/C1 system in EtOH measured using a 375-nm Laser.

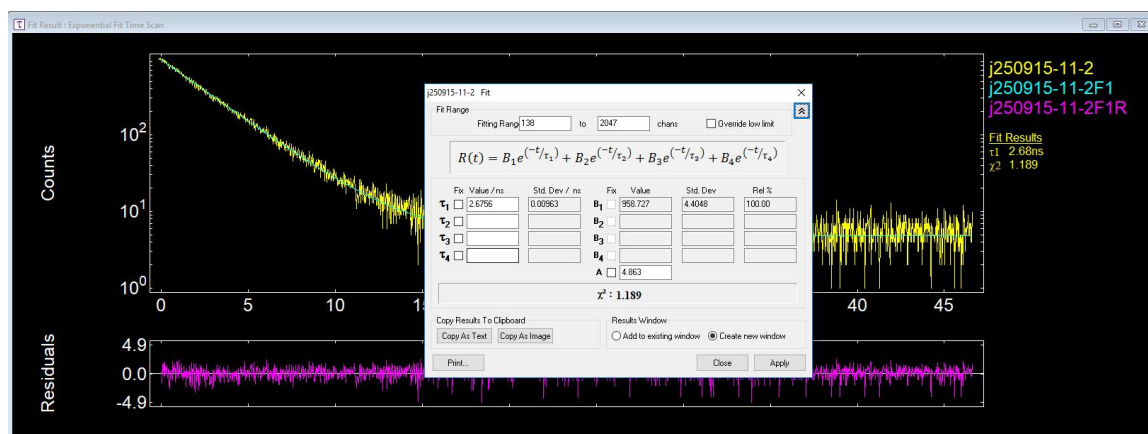

**Figure S48.** Fluorescence lifetime of Eu-P6MOF/C6/C1 system in EtOH measured using a 450-nm Laser.

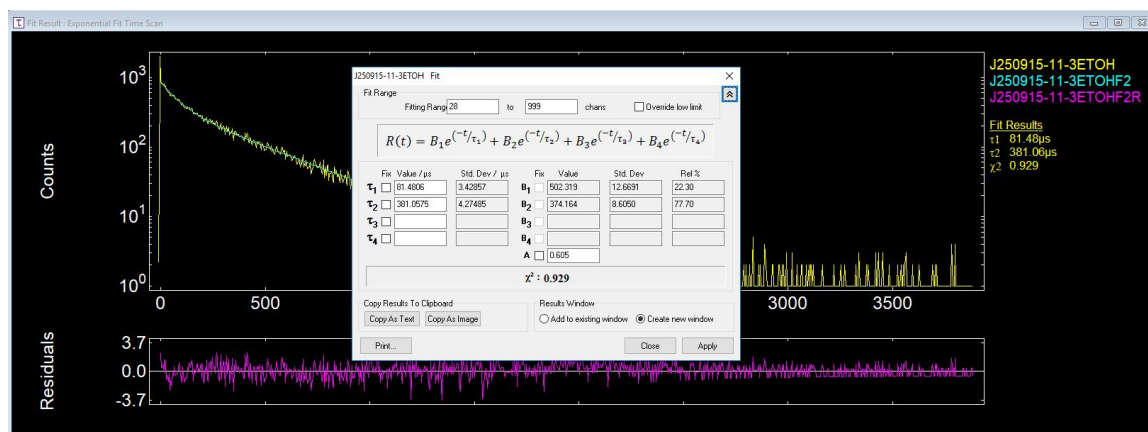

**Figure S49.** Fluorescence lifetime of Eu-P6MOF/C6/C1 system in EtOH measured using a 375-nm Microsecond Flashlamp.

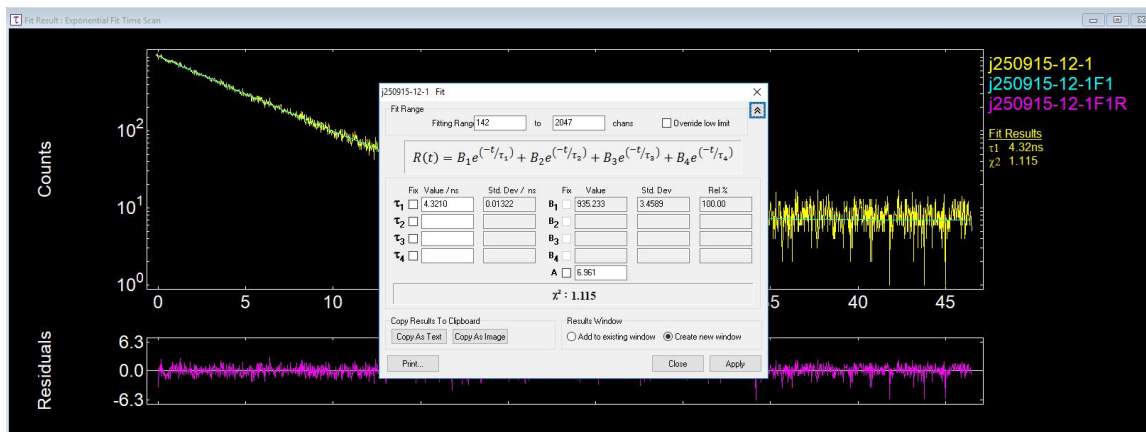

**Figure S50.** Fluorescence lifetime of Perylene (0.15  $\mu\text{g/mL}$ , 30  $\mu\text{L}$  of 0.01  $\text{mg/mL}$  stock solution in 2 mL EtOH) measured using a 450-nm Laser.

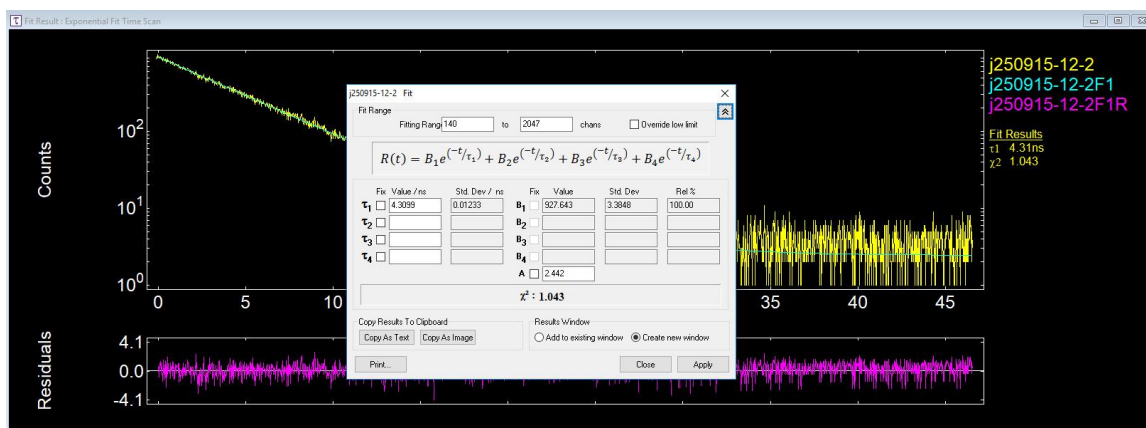

**Figure S51.** Fluorescence lifetime of Perylene (0.15  $\mu\text{g/mL}$ , 30  $\mu\text{L}$  of 0.01  $\text{mg/mL}$  stock solution in 2 mL EtOH) measured using a 375-nm Laser.

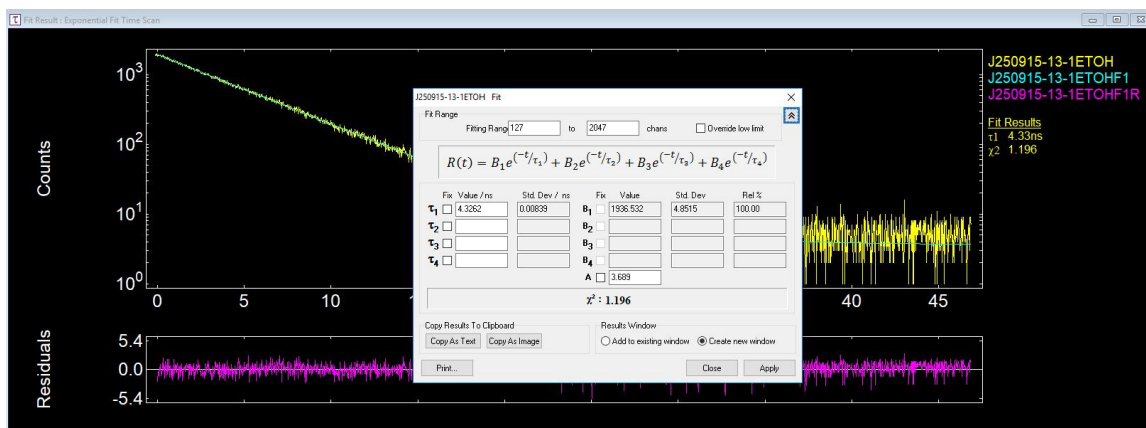

**Figure S52.** Fluorescence lifetime of Eu-P6MOF/C6/Perylene system in EtOH measured using a 450-nm Laser.

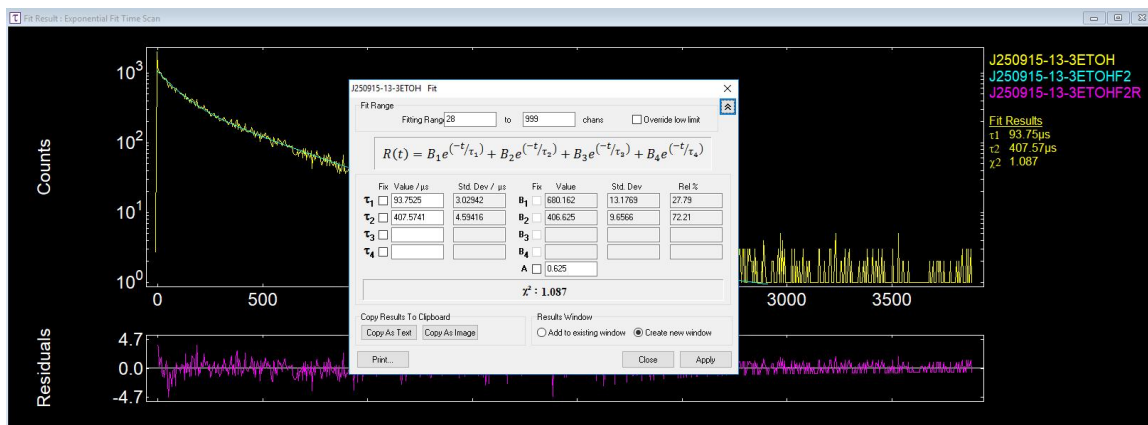

**Figure S53.** Fluorescence lifetime of **Eu-P6MOF/C6/Perylene** system in EtOH measured using a 375-nm Microsecond Flashlamp.

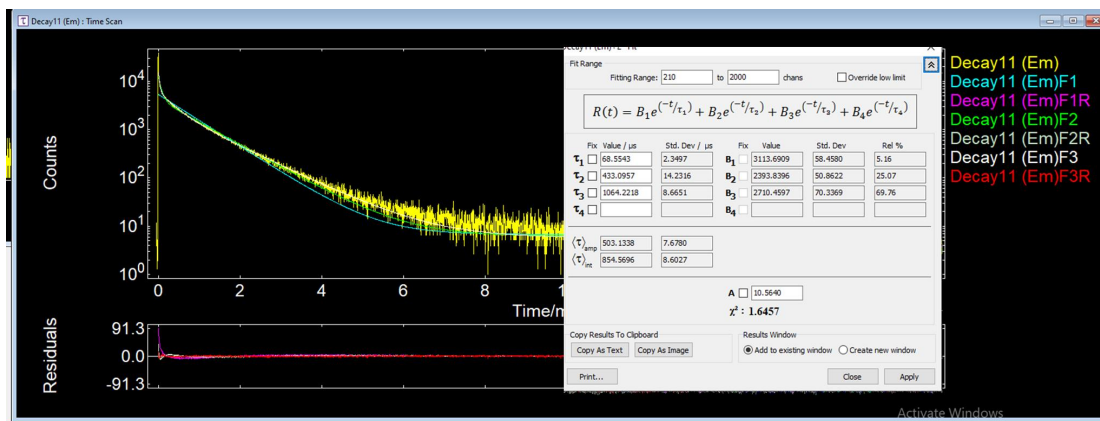

Figure S54. Fluorescence lifetime of Eu-P6MOF/C6/C1 system in DMF at 323K.

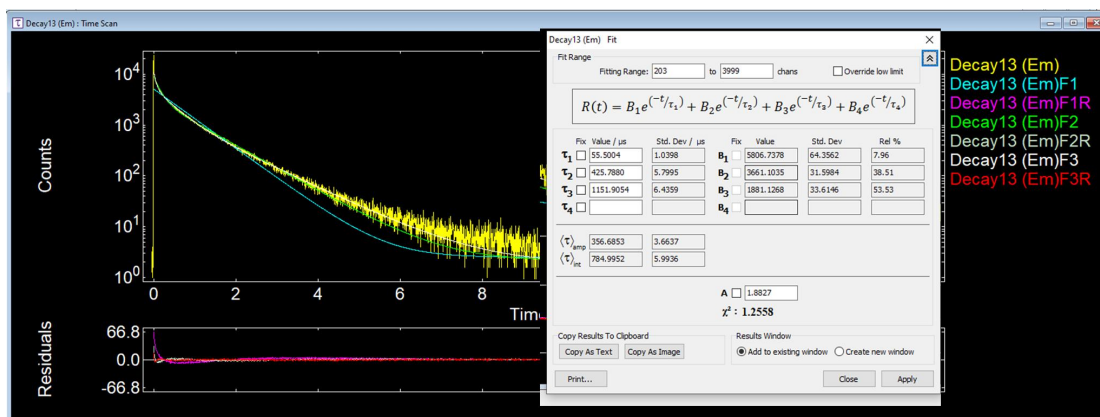

Figure S55. Fluorescence lifetime of Eu-P6MOF/C6/C1 system in DMF at 348K.

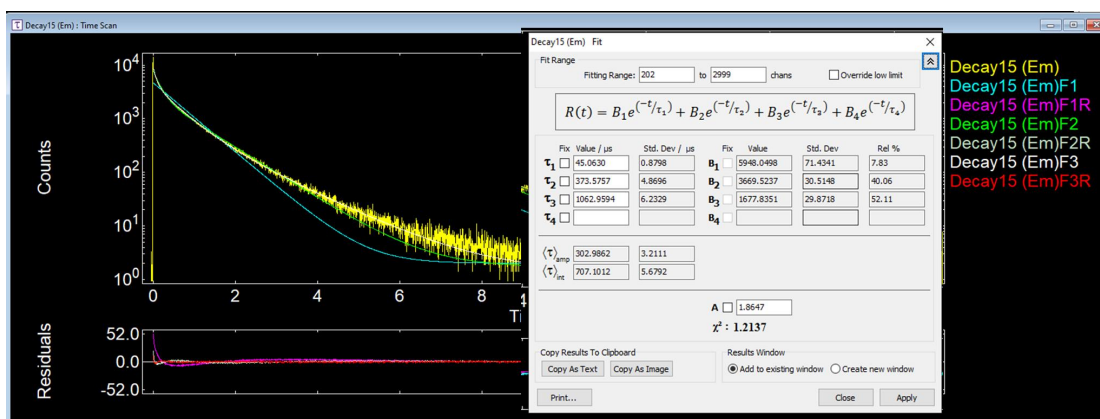

Figure S56. Fluorescence lifetime of Eu-P6MOF/C6/C1 system in DMF at 373K.

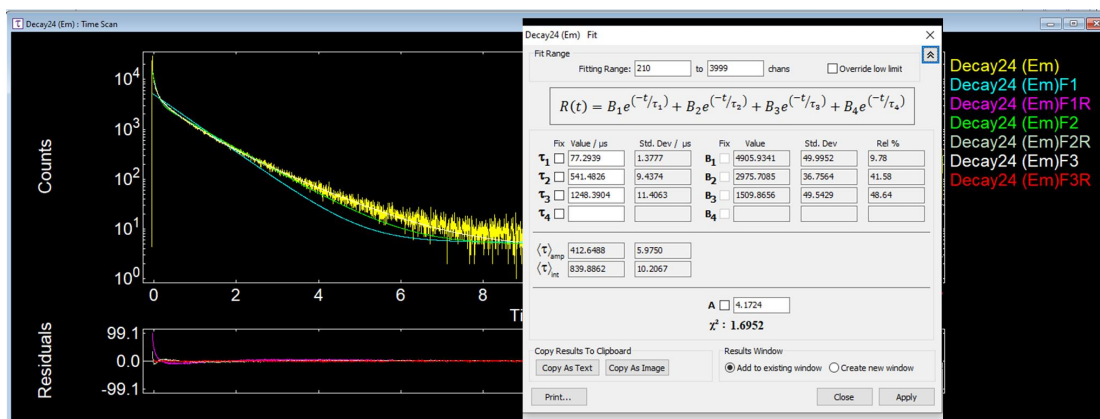

**Figure S57.** Fluorescence lifetime of Eu-P6MOF/C6/Perylene system in DMF at 323K.

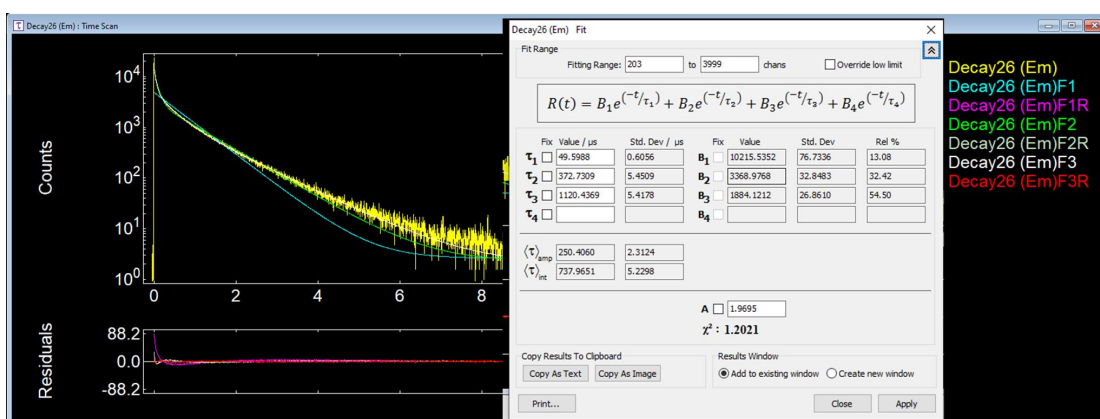

**Figure S58.** Fluorescence lifetime of Eu-P6MOF/C6/Perylene system in DMF at 348K.

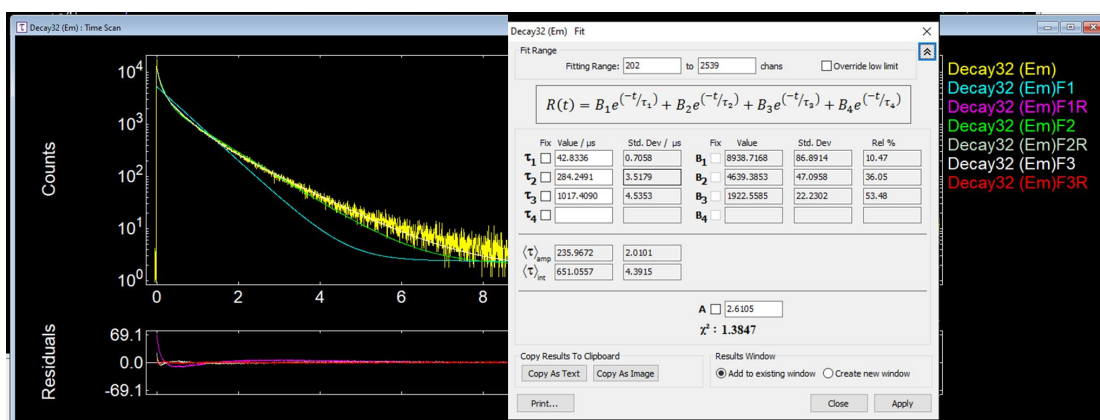

**Figure S59.** Fluorescence lifetime of Eu-P6MOF/C6/Perylene system in DMF at 373K.

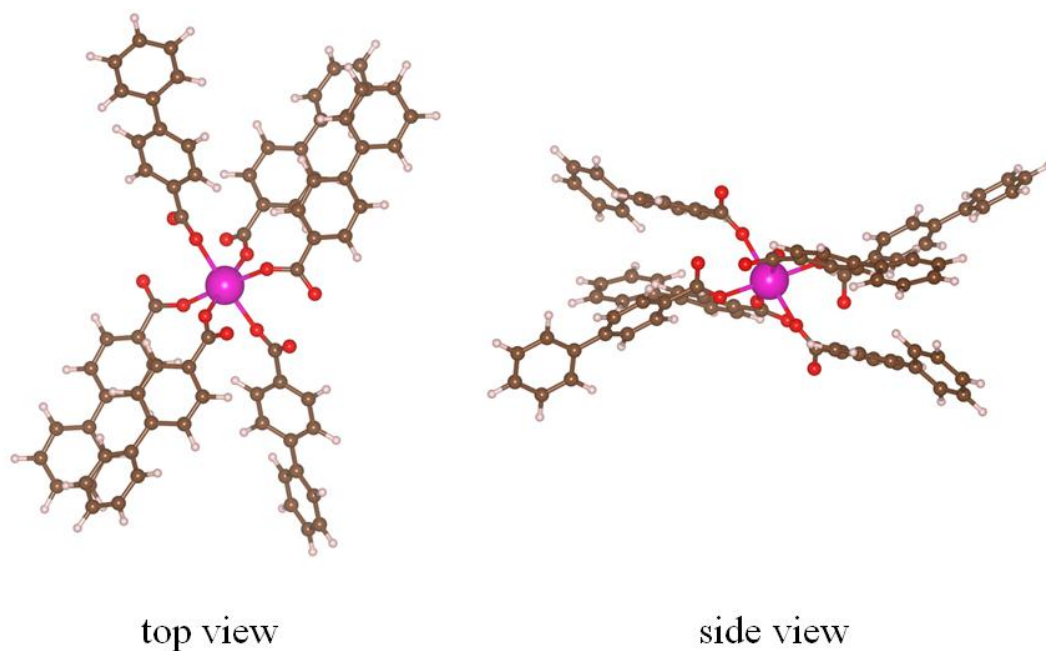

**Figure S60.** Optimized geometric structure of the **Eu-P6MOF** framework calculated using density functional theory (DFT) based on the VASP package. Top and side views are shown on the left and right, respectively. Color code: Eu (purple), O (red), C (brown), H (light pink).

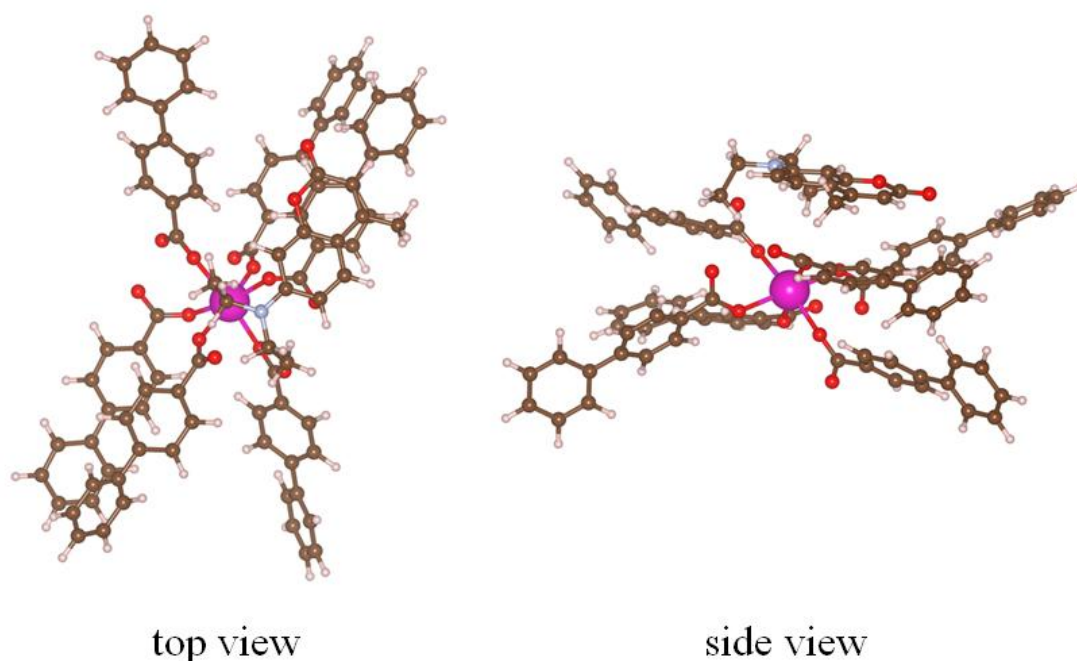

**Figure S61.** Optimized geometries of the interaction between **Eu-P6MOF** and Coumarin1 calculated using density functional theory (DFT) based on the VASP package, along with the corresponding binding energy ( $E_b = -2.07$  eV). Top and side views are shown on the left and right, respectively. Color code: Eu (purple), O (red), C (brown), H (light pink), N (light blue).

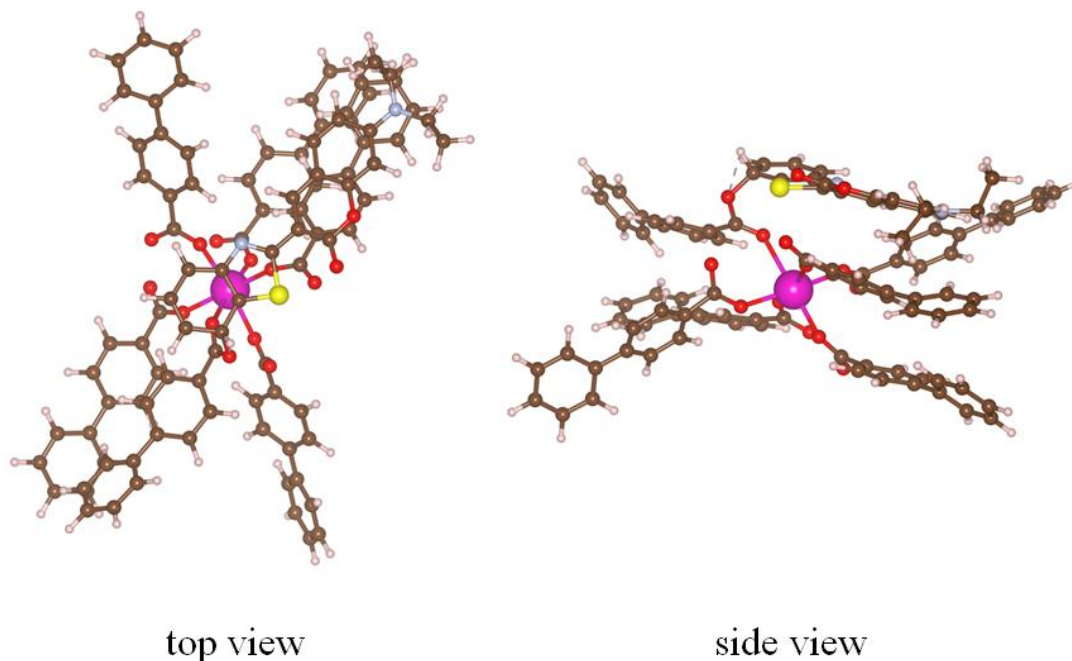

**Figure S62.** Optimized geometries of the interaction between **Eu-P6MOF** and Coumarin6 calculated using density functional theory (DFT) based on the VASP package, along with the corresponding binding energy ( $E_b = -1.54$  eV). Top and side views are shown on the left and right, respectively. Color code: Eu (purple), O (red), C (brown), H (light pink), N (light blue), S (yellow).

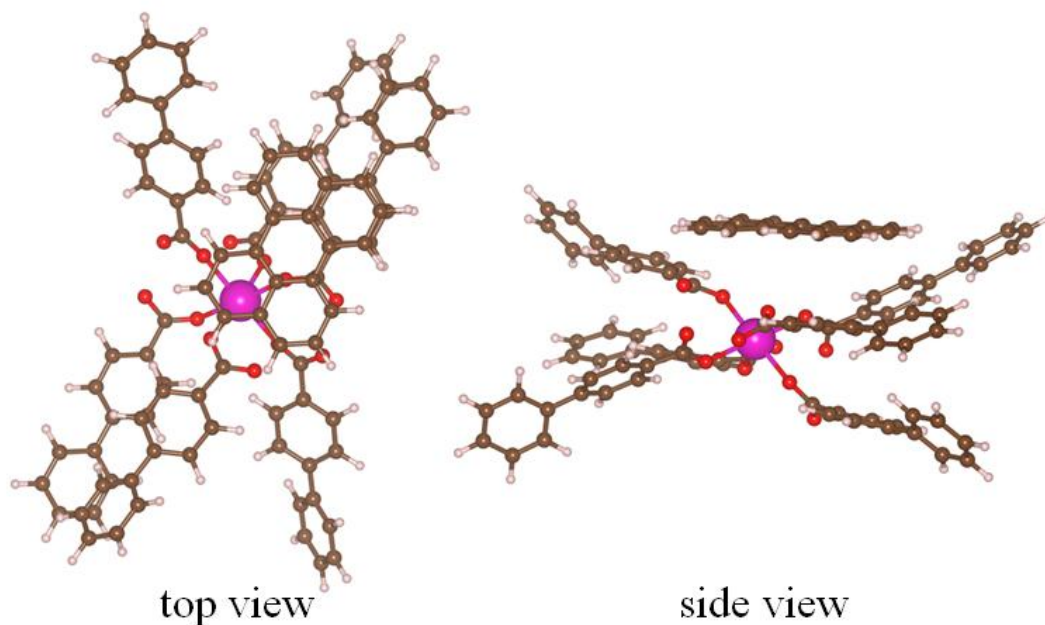

**Figure S63.** Optimized geometries of the interaction between **Eu-P6MOF** and Perylene calculated using density functional theory (DFT) based on the VASP package, along with the corresponding binding energy ( $E_b = -1.18$  eV). Top and side views are shown on the left and right, respectively. Color code: Eu (purple), O (red), C (brown), H (light pink).

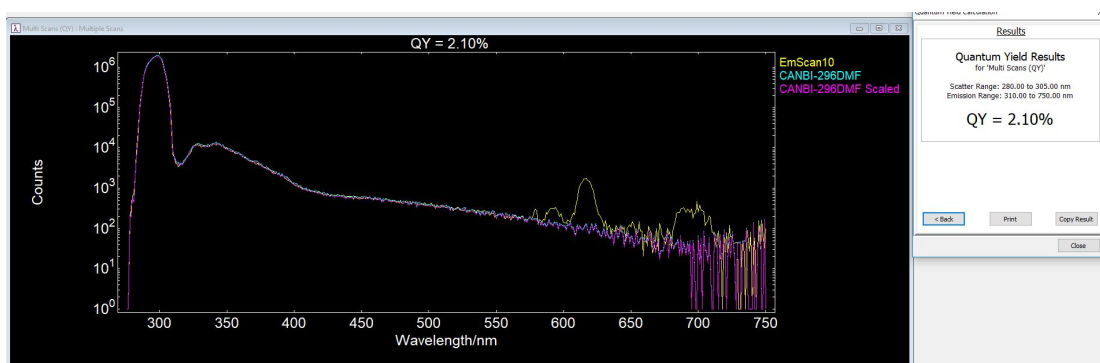

**Figure S64.** Quantum yield of **Eu-P6MOF** suspension (1 mg in 10 mL DMF) upon 296 nm excitation.

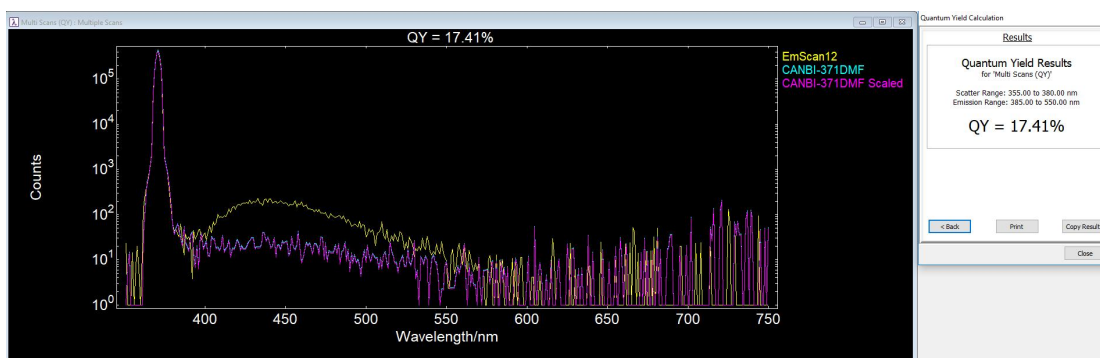

**Figure S65.** Quantum yield of Coumarin 1 (0.25  $\mu\text{g/mL}$ , 5  $\mu\text{L}$  of 0.1 mg/mL stock solution in 2 mL DMF) upon 371 nm excitation.

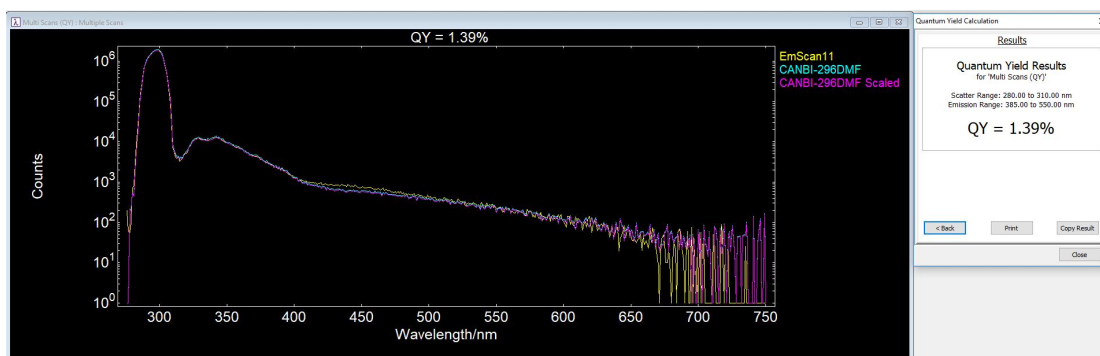

**Figure S66.** Quantum yield of Coumarin 1 (0.25  $\mu\text{g/mL}$ , 5  $\mu\text{L}$  of 0.1 mg/mL stock solution in 2 mL DMF) upon 296 nm excitation.

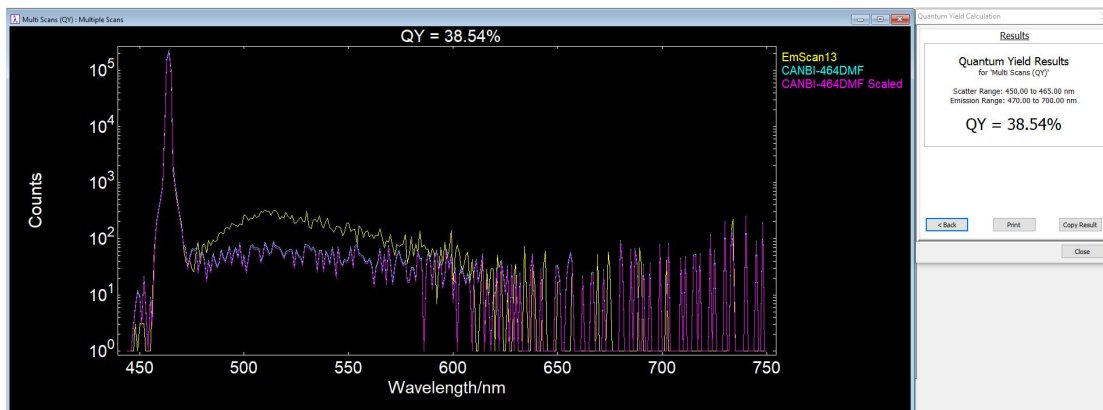

**Figure S67.** Quantum yield of Coumarin 6 ( $0.15 \mu\text{g/mL}$ ,  $3 \mu\text{L}$  of  $0.1 \text{ mg/mL}$  stock solution in  $2 \text{ mL DMF}$ ) upon  $464 \text{ nm}$  excitation.

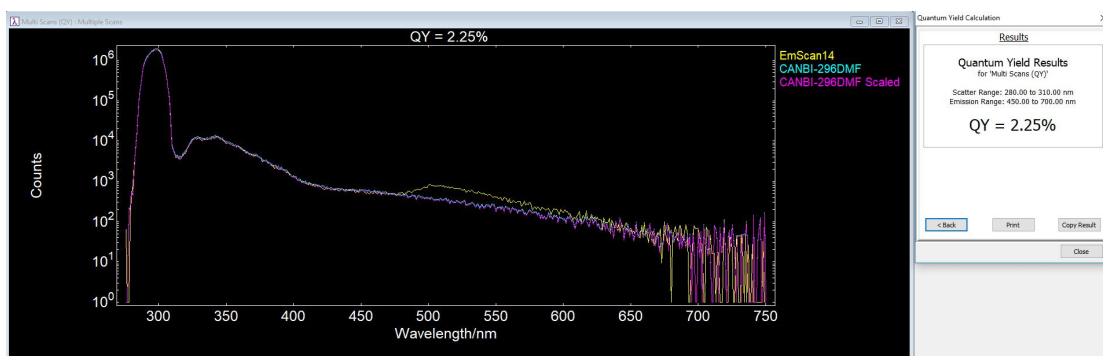

**Figure S68.** Quantum yield of Coumarin 6 ( $0.15 \mu\text{g/mL}$ ,  $3 \mu\text{L}$  of  $0.1 \text{ mg/mL}$  stock solution in  $2 \text{ mL DMF}$ ) upon  $296 \text{ nm}$  excitation.

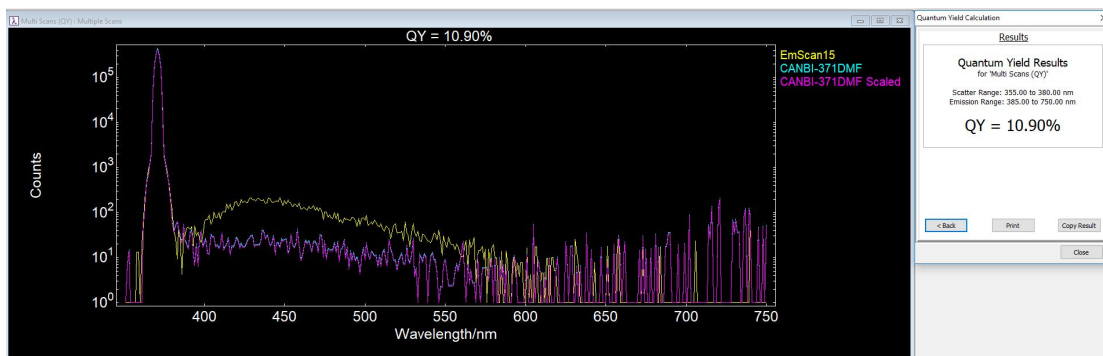

**Figure S69.** Quantum yield of **Eu-P6MOF/C6/C1** system in **DMF** upon  $371 \text{ nm}$  excitation.

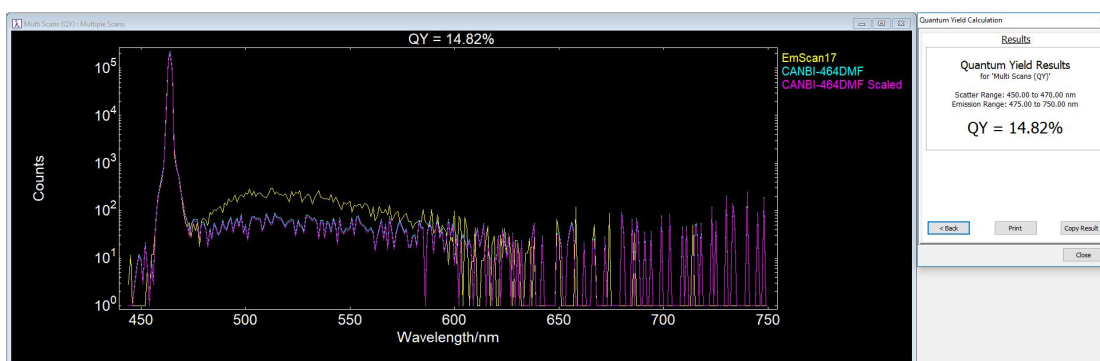

**Figure S70.** Quantum yield of Eu-P6MOF/C6/C1 system in DMF upon 464 nm excitation.

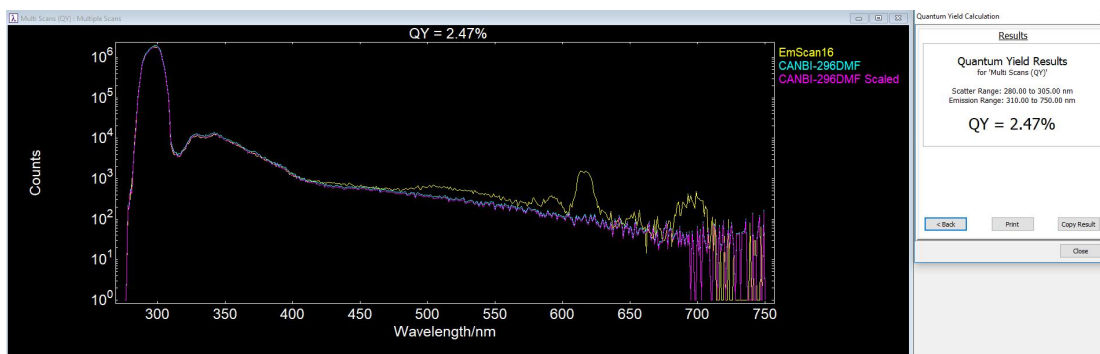

**Figure S71.** Quantum yield of Eu-P6MOF/C6/C1 system in DMF upon 296 nm excitation.

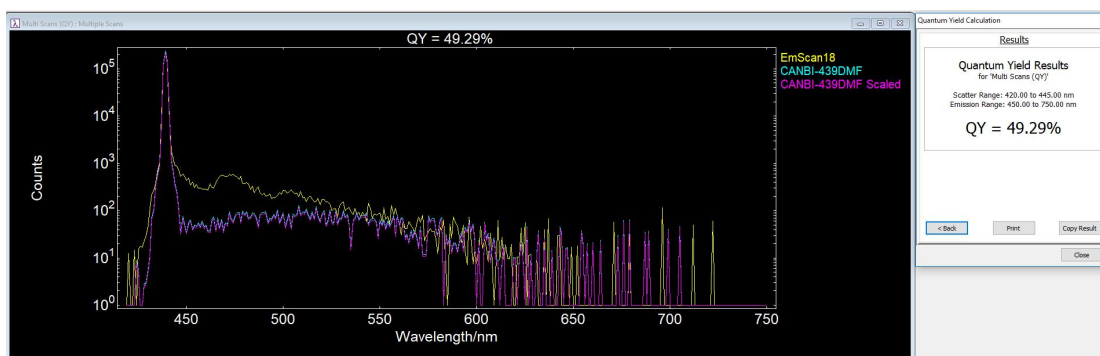

**Figure S72.** Quantum yield of Perylene (0.525 µg/mL, 10.5 µL of 0.1 mg/mL stock solution in 2 mL DMF) upon 439 nm excitation.

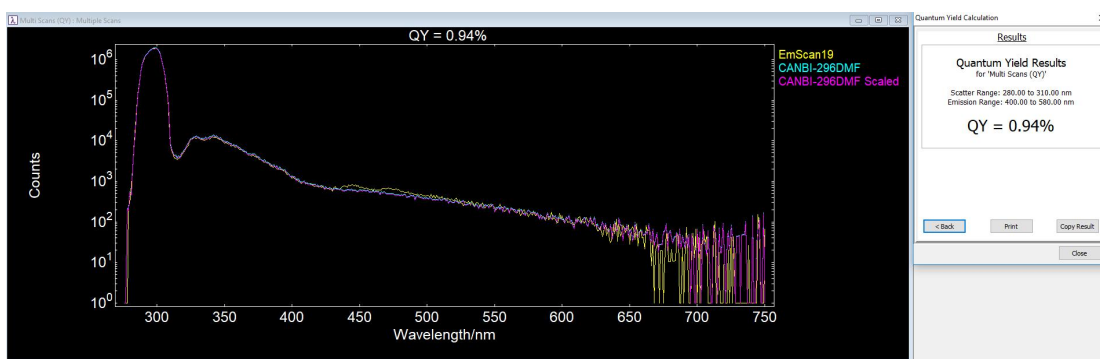

**Figure S73.** Quantum yield of Perylene (0.525  $\mu\text{g/mL}$ , 10.5  $\mu\text{L}$  of 0.1  $\text{mg/mL}$  stock solution in 2 mL DMF) upon 296 nm excitation.

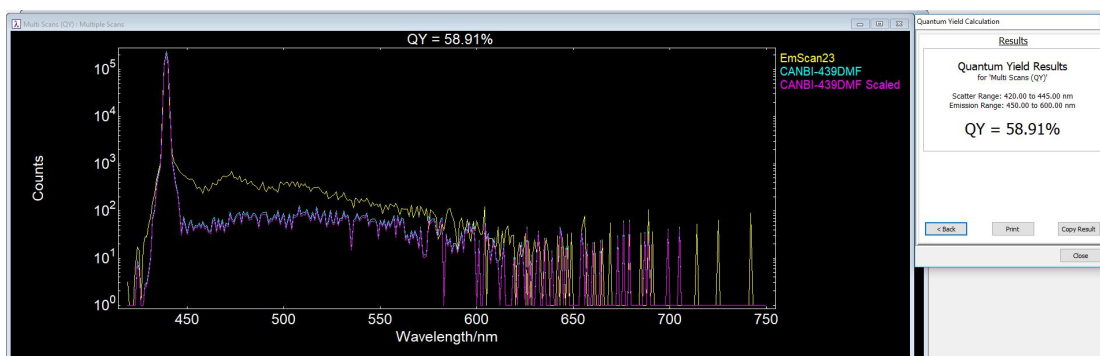

**Figure S74.** Quantum yield of Eu-P6MOF/C6/Perylene system in DMF upon 439 nm excitation.

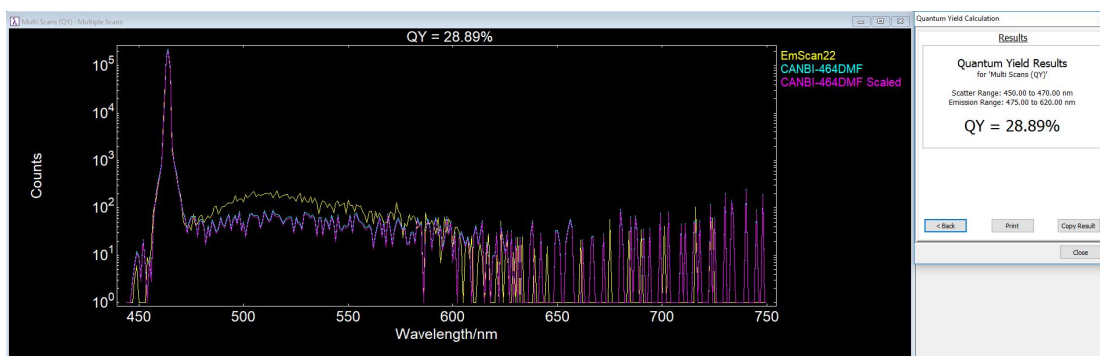

**Figure S75.** Quantum yield of Eu-P6MOF/C6/Perylene system in DMF upon 464 nm excitation.

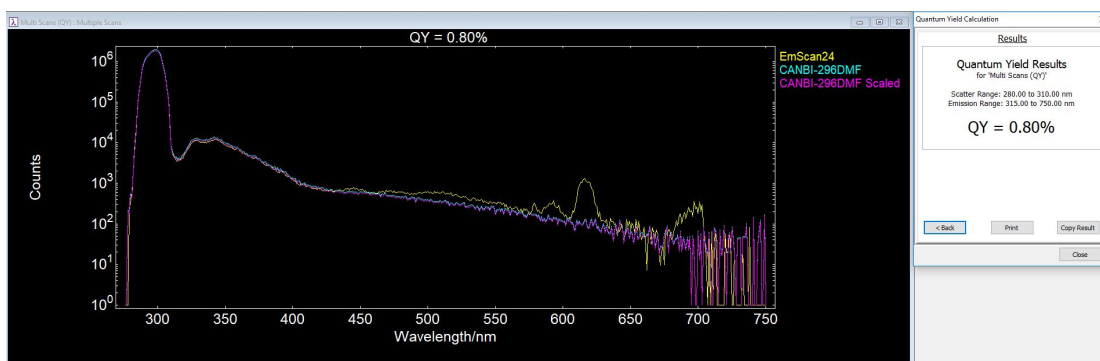

**Figure S76.** Quantum yield of Eu-P6MOF/C6/Perylene system in DMF upon 296 nm excitation.

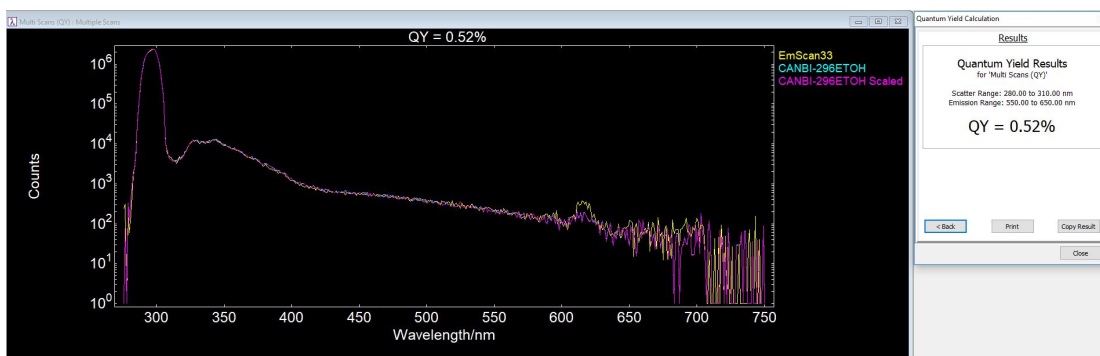

**Figure S77.** Quantum yield of Eu-P6MOF suspension (1 mg in 10 mL EtOH) upon 296 nm excitation.

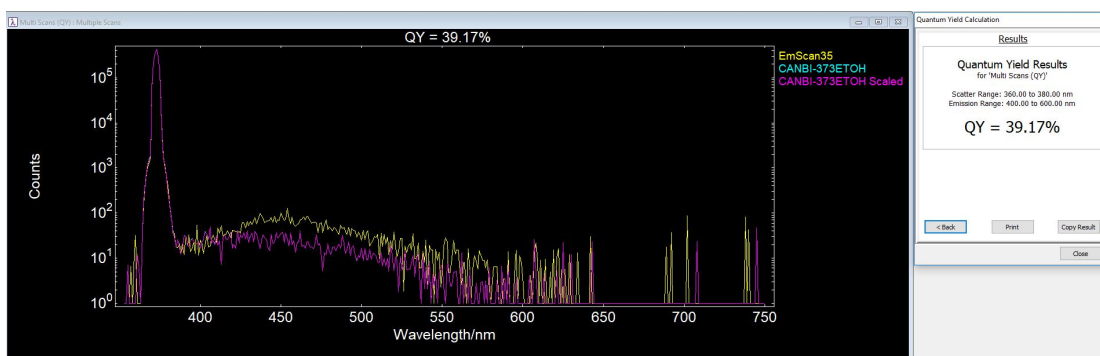

**Figure S78.** Quantum yield of Coumarin 1 (0.07  $\mu\text{g/mL}$ , 14  $\mu\text{L}$  of 0.01 mg/mL stock solution in 2 mL EtOH) upon 373 nm excitation.

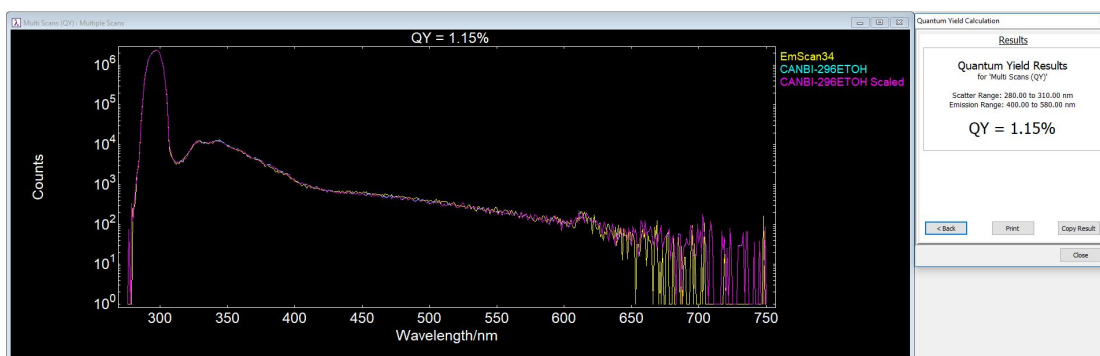

**Figure S79.** Quantum yield of Coumarin 1 (0.07  $\mu\text{g/mL}$ , 14  $\mu\text{L}$  of 0.01 mg/mL stock solution in 2 mL EtOH) upon 296 nm excitation.

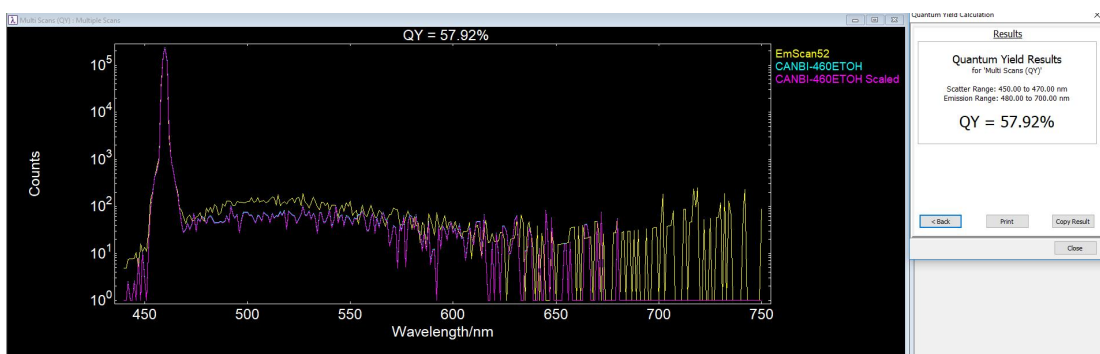

**Figure S80.** Quantum yield of Coumarin 6 (0.0425  $\mu\text{g/mL}$ , 8.5  $\mu\text{L}$  of 0.01 mg/mL stock solution in 2 mL EtOH) upon 460 nm excitation.

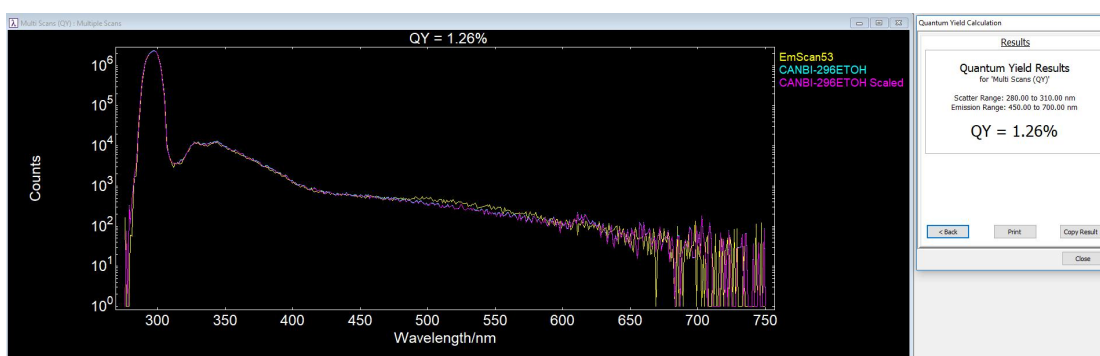

**Figure S81.** Quantum yield of Coumarin 6 (0.0425  $\mu\text{g/mL}$ , 8.5  $\mu\text{L}$  of 0.01 mg/mL stock solution in 2 mL EtOH) upon 296 nm excitation.

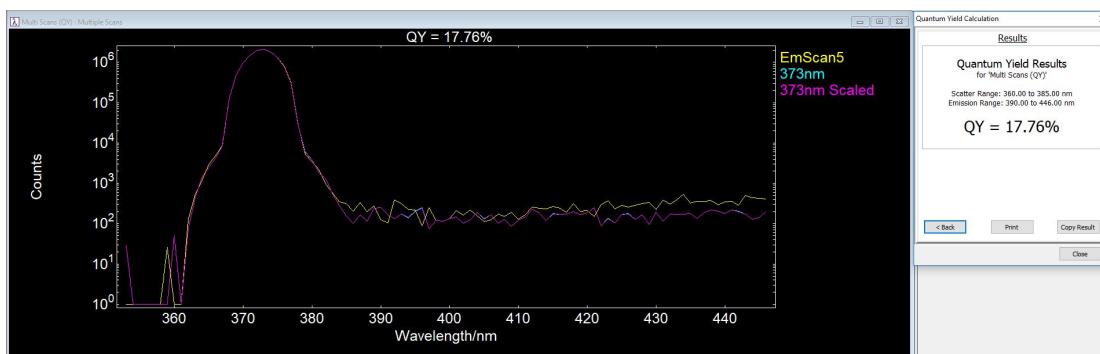

**Figure S82.** Quantum yield of Eu-P6MOF/C6/C1 system in EtOH upon 373 nm excitation.

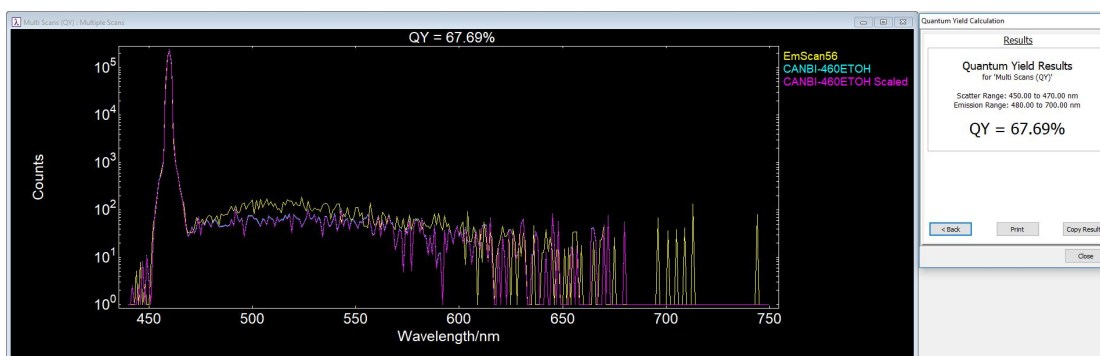

**Figure S83.** Quantum yield of Eu-P6MOF/C6/C1 system in EtOH upon 460 nm excitation.

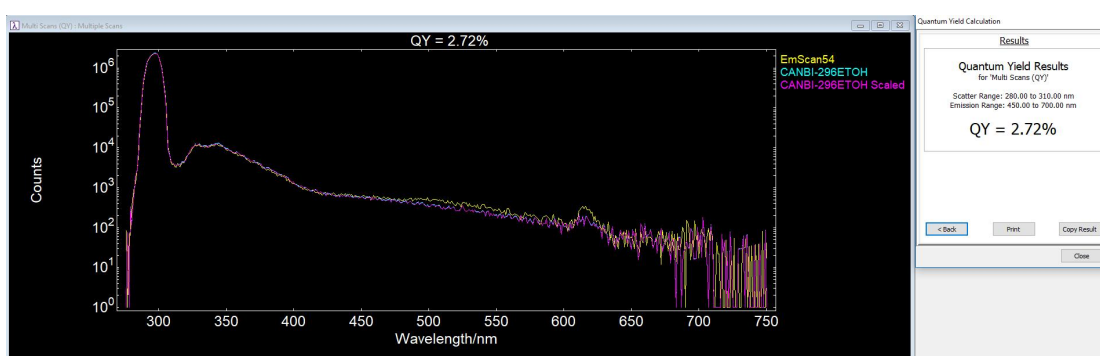

**Figure S84.** Quantum yield of Eu-P6MOF/C6/C1 system in EtOH upon 296 nm excitation.

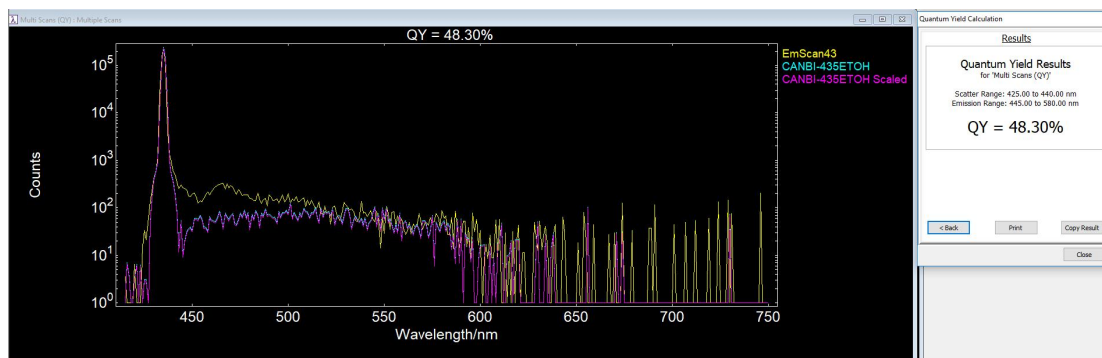

**Figure S85.** Quantum yield of Perylene (0.15  $\mu\text{g/mL}$ , 30  $\mu\text{L}$  of 0.01  $\text{mg/mL}$  stock solution in 2 mL EtOH) upon 435 nm excitation.

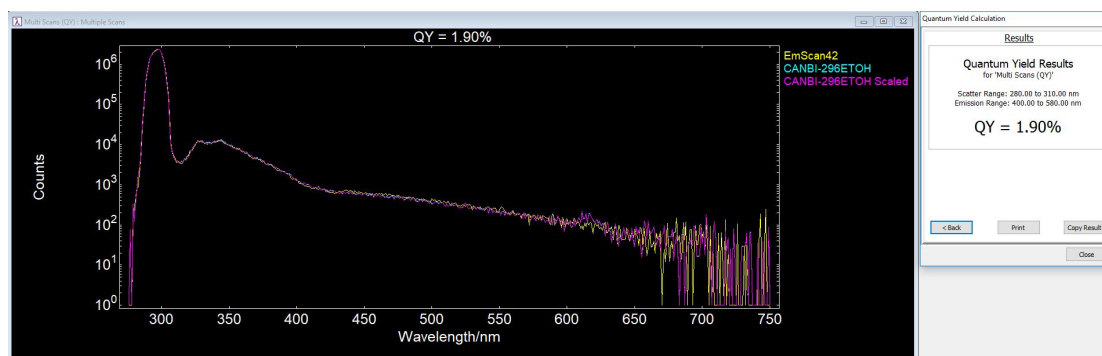

**Figure S86.** Quantum yield of Perylene (0.15  $\mu\text{g/mL}$ , 30  $\mu\text{L}$  of 0.01  $\text{mg/mL}$  stock solution in 2 mL EtOH) upon 296 nm excitation.

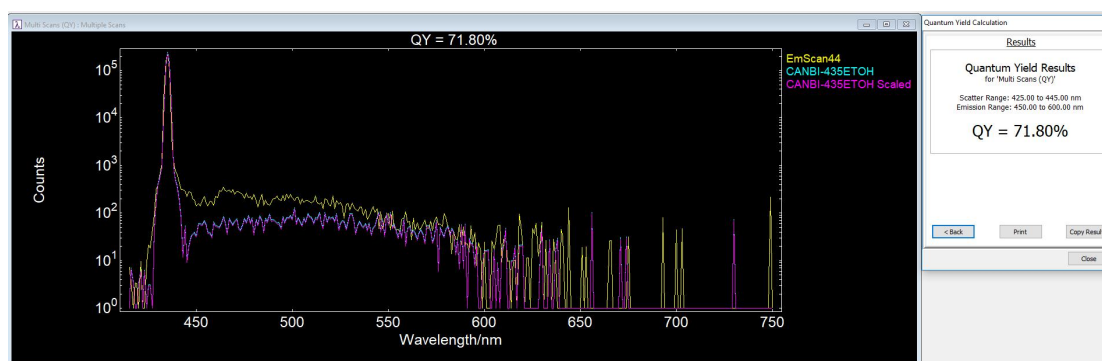

**Figure S87.** Quantum yield of Eu-P6MOF/C6/Perylene system in EtOH upon 435 nm excitation.

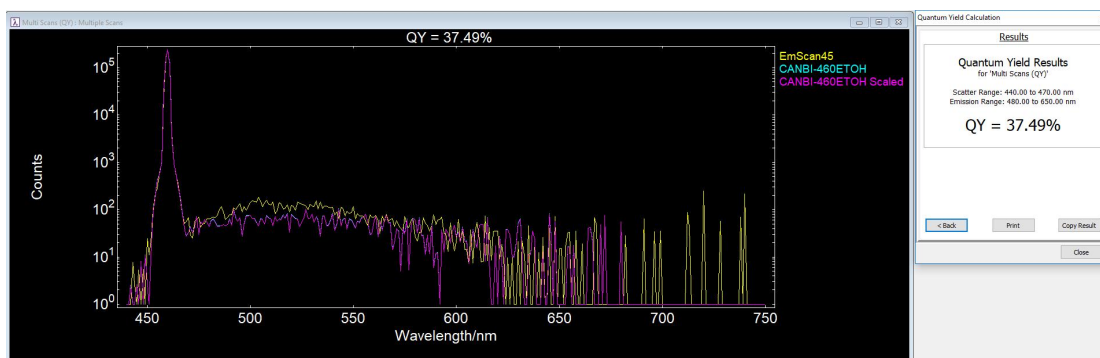

**Figure S88.** Quantum yield of Eu-P6MOF/C6/Perylene system in EtOH upon 460 nm excitation.

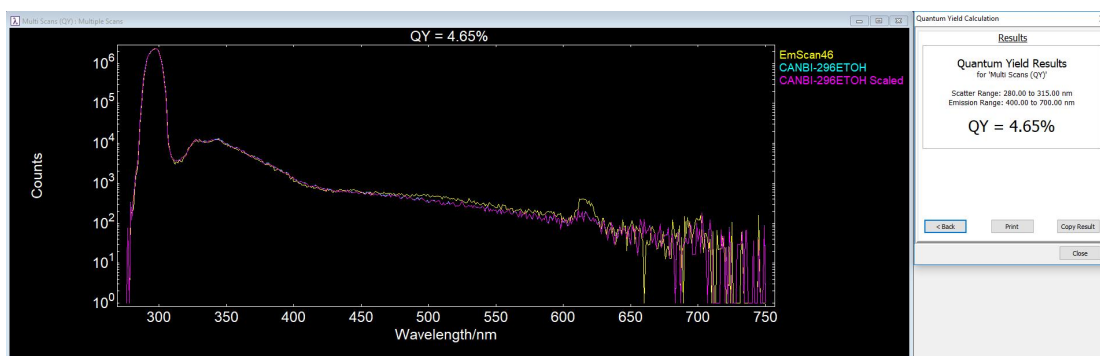

**Figure S89.** Quantum yield of Eu-P6MOF/C6/Perylene system in EtOH upon 296 nm excitation.

**Table S1.** Fluorescence Titration and Corresponding CIE Coordinates of the Eu-P6MOF/C6/C1 system in DMF.

| No.                                             | CIE x  | CIE y  |
|-------------------------------------------------|--------|--------|
| Eu-P6MOF                                        | 0.635  | 0.3337 |
| Eu-C6 1 $\mu$ L(0.1 $\mu$ g)                    | 0.532  | 0.4071 |
| Eu-C6 2 $\mu$ L(0.2 $\mu$ g)                    | 0.471  | 0.4503 |
| Eu-C6 3 $\mu$ L(0.3 $\mu$ g)                    | 0.4305 | 0.4788 |
| Eu-C6(0.3 $\mu$ g)-C1 1 $\mu$ L(0.1 $\mu$ g)    | 0.4026 | 0.4386 |
| Eu-C6(0.3 $\mu$ g)-C1 2 $\mu$ L(0.2 $\mu$ g)    | 0.3814 | 0.4045 |
| Eu-C6(0.3 $\mu$ g)-C1 3 $\mu$ L(0.3 $\mu$ g)    | 0.3627 | 0.3784 |
| Eu-C6(0.3 $\mu$ g)-C1 4 $\mu$ L(0.4 $\mu$ g)    | 0.347  | 0.3546 |
| Eu-C6(0.3 $\mu$ g)-C1 5 $\mu$ L(0.5 $\mu$ g)    | 0.3337 | 0.3346 |
| Eu-C6(0.3 $\mu$ g)-C1 5.5 $\mu$ L(0.55 $\mu$ g) | 0.3276 | 0.3254 |
| Eu-C6(0.3 $\mu$ g)-C1 6 $\mu$ L(0.6 $\mu$ g)    | 0.3209 | 0.3162 |
| Eu-C6(0.3 $\mu$ g)-C1 7 $\mu$ L(0.7 $\mu$ g)    | 0.3098 | 0.2999 |
| Eu-C6(0.3 $\mu$ g)-C1 8 $\mu$ L(0.8 $\mu$ g)    | 0.3009 | 0.285  |
| Eu-C6(0.3 $\mu$ g)-C1 9 $\mu$ L(0.9 $\mu$ g)    | 0.2914 | 0.2724 |
| Eu-C6(0.3 $\mu$ g)-C1 10 $\mu$ L(1 $\mu$ g)     | 0.2842 | 0.2609 |

**Table S2.** Photostability of the **Eu-P6MOF/C6/C1** system in DMF.

| No.  | CIE x           | CIE y  | CIE x  | CIE y  | CIE x  | CIE y  | CIE x                 | CIE y  | CIE x              | CIE y  | CIE x              | CIE y  |
|------|-----------------|--------|--------|--------|--------|--------|-----------------------|--------|--------------------|--------|--------------------|--------|
|      | <b>Eu-P6MOF</b> |        | C1     |        | C6     |        | <b>Eu-P6MOF-C6-C1</b> |        | <b>Eu-P6MOF-C1</b> |        | <b>Eu-P6MOF-C6</b> |        |
| 0 h  | 0.6341          | 0.3332 | 0.1636 | 0.0572 | 0.2302 | 0.6166 | 0.3337                | 0.3346 | 0.3815             | 0.185  | 0.4197             | 0.4767 |
| 1 h  | 0.6336          | 0.3335 | 0.1631 | 0.0576 | 0.2303 | 0.6148 | 0.332                 | 0.3392 | 0.3905             | 0.1915 | 0.4232             | 0.4704 |
| 2 h  | 0.6333          | 0.3334 | 0.163  | 0.0586 | 0.2301 | 0.6143 | 0.3304                | 0.3412 | 0.3926             | 0.1936 | 0.4264             | 0.463  |
| 3 h  | 0.6335          | 0.3336 | 0.163  | 0.0596 | 0.2302 | 0.6142 | 0.3293                | 0.3432 | 0.3961             | 0.1966 | 0.4296             | 0.4597 |
| 4 h  | 0.6326          | 0.3338 | 0.1631 | 0.0606 | 0.2304 | 0.6143 | 0.3277                | 0.3449 | 0.3987             | 0.1987 | 0.4299             | 0.4582 |
| 5 h  | 0.6323          | 0.3337 | 0.1631 | 0.0616 | 0.2303 | 0.6149 | 0.3287                | 0.3463 | 0.4032             | 0.202  | 0.4318             | 0.4571 |
| 16 h | 0.6319          | 0.3338 | 0.1646 | 0.0747 | 0.2313 | 0.6151 | 0.3193                | 0.3667 | 0.4174             | 0.2153 | 0.4283             | 0.4598 |
| 21 h | 0.6307          | 0.3333 | 0.1658 | 0.082  | 0.2322 | 0.6163 | 0.3216                | 0.3755 | 0.4288             | 0.2241 | 0.4295             | 0.4595 |
| 24 h | 0.6306          | 0.3334 | 0.1665 | 0.0857 | 0.2324 | 0.6166 | 0.3182                | 0.3795 | 0.4311             | 0.2267 | 0.429              | 0.459  |

**Table S3.** Fluorescence Titration and Corresponding CIE Coordinates of the **Eu-P6MOF/C6/Perylene** system in DMF.

| No.                                                                                        | CIE x         | CIE y         |
|--------------------------------------------------------------------------------------------|---------------|---------------|
| Eu-P6MOF                                                                                   | 0.6382        | 0.332         |
| Eu-C6 0.5 $\mu$ L(0.05 $\mu$ g)                                                            | 0.5771        | 0.3757        |
| Eu-C6 1 $\mu$ L(0.1 $\mu$ g)                                                               | 0.5149        | 0.42          |
| Eu-C6 1.5 $\mu$ L(0.15 $\mu$ g)                                                            | 0.4788        | 0.4451        |
| Eu-C6 2 $\mu$ L(0.2 $\mu$ g)                                                               | 0.452         | 0.4636        |
| Eu-C6 2.5 $\mu$ L(0.25 $\mu$ g)                                                            | 0.431         | 0.4785        |
| Eu-C6(0.25 $\mu$ g)-Perylene 2 $\mu$ L(0.2 $\mu$ g)                                        | 0.4014        | 0.4388        |
| Eu-C6(0.25 $\mu$ g)-Perylene 4 $\mu$ L(0.4 $\mu$ g)                                        | 0.3779        | 0.4061        |
| Eu-C6(0.25 $\mu$ g)-Perylene 6 $\mu$ L(0.6 $\mu$ g)                                        | 0.3598        | 0.3796        |
| Eu-C6(0.25 $\mu$ g)-Perylene 8 $\mu$ L(0.8 $\mu$ g)                                        | 0.3439        | 0.3573        |
| Eu-C6(0.25 $\mu$ g)-Perylene 10 $\mu$ L(1 $\mu$ g)                                         | 0.3293        | 0.3383        |
| <b>Eu-C6(0.25 <math>\mu</math>g)-Perylene 10.5<math>\mu</math>L(1.05<math>\mu</math>g)</b> | <b>0.3283</b> | <b>0.3348</b> |
| Eu-C6(0.25 $\mu$ g)-Perylene 11 $\mu$ L(1.1 $\mu$ g)                                       | 0.3249        | 0.3303        |
| Eu-C6(0.25 $\mu$ g)-Perylene 13 $\mu$ L(1.3 $\mu$ g)                                       | 0.3148        | 0.3158        |
| Eu-C6(0.25 $\mu$ g)-Perylene 15 $\mu$ L(1.5 $\mu$ g)                                       | 0.3039        | 0.3019        |

**Table S4.** Photostability of the **Eu-P6MOF/C6/ Perylene** System in DMF.

| No.  | CIE x           | CIE y  | CIE x    | CIE y  | CIE x  | CIE y  | CIE x                       | CIE y  | CIE x                    | CIE y  | CIE x              | CIE y  |
|------|-----------------|--------|----------|--------|--------|--------|-----------------------------|--------|--------------------------|--------|--------------------|--------|
|      | <b>Eu-P6MOF</b> |        | Perylene |        | C6     |        | <b>Eu-P6MOF-C6-Perylene</b> |        | <b>Eu-P6MOF-Perylene</b> |        | <b>Eu-P6MOF-C6</b> |        |
| 0 h  | 0.6357          | 0.3323 | 0.1548   | 0.0982 | 0.2354 | 0.6186 | 0.3246                      | 0.338  | 0.3757                   | 0.2046 | 0.4257             | 0.4785 |
| 1 h  | 0.6339          | 0.3312 | 0.155    | 0.098  | 0.2366 | 0.6172 | 0.3297                      | 0.3375 | 0.3746                   | 0.2042 | 0.4257             | 0.4773 |
| 2 h  | 0.6316          | 0.3305 | 0.1551   | 0.0982 | 0.2367 | 0.6179 | 0.332                       | 0.3374 | 0.3727                   | 0.2033 | 0.4233             | 0.4778 |
| 3 h  | 0.6321          | 0.3311 | 0.1551   | 0.0983 | 0.2364 | 0.6175 | 0.334                       | 0.3371 | 0.3757                   | 0.2051 | 0.4251             | 0.4764 |
| 4 h  | 0.6306          | 0.3305 | 0.1552   | 0.0984 | 0.2366 | 0.6173 | 0.3381                      | 0.337  | 0.3748                   | 0.2048 | 0.4247             | 0.4762 |
| 5 h  | 0.6316          | 0.3311 | 0.1552   | 0.0985 | 0.2366 | 0.6176 | 0.3358                      | 0.3371 | 0.3757                   | 0.2055 | 0.4275             | 0.4742 |
| 6 h  | 0.6298          | 0.3305 | 0.1553   | 0.0988 | 0.2366 | 0.618  | 0.3416                      | 0.3368 | 0.3744                   | 0.2052 | 0.4273             | 0.4738 |
| 16 h | 0.626           | 0.3294 | 0.156    | 0.1001 | 0.237  | 0.6184 | 0.3312                      | 0.3345 | 0.3687                   | 0.2035 | 0.4243             | 0.4737 |
| 21 h | 0.623           | 0.3279 | 0.1561   | 0.1007 | 0.2371 | 0.6188 | 0.3301                      | 0.3332 | 0.3704                   | 0.2049 | 0.4211             | 0.474  |
| 24 h | 0.6208          | 0.3272 | 0.1563   | 0.1008 | 0.2369 | 0.6189 | 0.3253                      | 0.3322 | 0.3648                   | 0.2022 | 0.4187             | 0.4737 |

**Table S5.** CIE coordinates of the **Eu-P6MOF-C6-Perylene** in DMF during storage.

| No.   | CIE x  | CIE y  |
|-------|--------|--------|
| 0 d   | 0.3246 | 0.338  |
| 80 d  | 0.3205 | 0.3219 |
| 168 d | 0.3129 | 0.3129 |
| 184 d | 0.3101 | 0.3103 |
| 197 d | 0.3058 | 0.3095 |

**Table S6.** Fluorescence Titration and Corresponding CIE Coordinates of the **Eu-P6MOF/C6/DPA** system in DMF.

| No.                                            | CIE x  | CIE y  |
|------------------------------------------------|--------|--------|
| Eu-P6MOF                                       | 0.6417 | 0.3308 |
| Eu-C6 0.5 $\mu$ L(0.05 $\mu$ g)                | 0.5579 | 0.3887 |
| Eu-C6 1 $\mu$ L(0.1 $\mu$ g)                   | 0.5063 | 0.4254 |
| Eu-C6 1.5 $\mu$ L(0.15 $\mu$ g)                | 0.4593 | 0.4577 |
| Eu-C6 2 $\mu$ L(0.2 $\mu$ g)                   | 0.4239 | 0.4827 |
| Eu-C6(0.2 $\mu$ g)-DPA 2 $\mu$ L(0.2 $\mu$ g)  | 0.408  | 0.4545 |
| Eu-C6(0.2 $\mu$ g)-DPA 4 $\mu$ L(0.4 $\mu$ g)  | 0.4014 | 0.4279 |
| Eu-C6(0.2 $\mu$ g)-DPA 6 $\mu$ L(0.6 $\mu$ g)  | 0.3827 | 0.41   |
| Eu-C6(0.2 $\mu$ g)-DPA 8 $\mu$ L(0.8 $\mu$ g)  | 0.3686 | 0.3909 |
| Eu-C6(0.2 $\mu$ g)-DPA 10 $\mu$ L(1.0 $\mu$ g) | 0.3574 | 0.3739 |
| Eu-C6(0.2 $\mu$ g)-DPA 12 $\mu$ L(1.2 $\mu$ g) | 0.3447 | 0.3588 |
| Eu-C6(0.2 $\mu$ g)-DPA 14 $\mu$ L(1.4 $\mu$ g) | 0.3341 | 0.3435 |
| Eu-C6(0.2 $\mu$ g)-DPA 16 $\mu$ L(1.6 $\mu$ g) | 0.3322 | 0.3306 |
| Eu-C6(0.2 $\mu$ g)-DPA 18 $\mu$ L(1.8 $\mu$ g) | 0.323  | 0.3184 |
| Eu-C6(0.2 $\mu$ g)-DPA 20 $\mu$ L(2.0 $\mu$ g) | 0.3199 | 0.3078 |

**Table S7.** Photostability of the **Eu-P6MOF/C6/ DPA** System in DMF.

| No.  | CIE x                  | CIE y  | CIE x      | CIE y  |
|------|------------------------|--------|------------|--------|
|      | <b>Eu-P6MOF-C6-DPA</b> |        | <b>DPA</b> |        |
| 0 h  | 0.3322                 | 0.3306 | 0.1719     | 0.0625 |
| 1 h  | 0.3282                 | 0.3312 | 0.1713     | 0.0619 |
| 2 h  | 0.3324                 | 0.3308 | 0.1712     | 0.0619 |
| 3 h  | 0.3307                 | 0.3306 | 0.1714     | 0.0619 |
| 4 h  | 0.3358                 | 0.3295 | 0.1713     | 0.0619 |
| 5 h  | 0.3385                 | 0.3303 | 0.1715     | 0.0622 |
| 16 h | 0.3388                 | 0.3311 | 0.1719     | 0.0633 |
| 21 h | 0.3329                 | 0.3301 | 0.172      | 0.0633 |
| 24 h | 0.3317                 | 0.3301 | 0.1721     | 0.0633 |

**Table S8.** Fluorescence Titration and Corresponding CIE Coordinates of the **Eu-P6MOF/C6/Perylene** system in EtOH.

| No.                                                                                        | CIE x         | CIE y         |
|--------------------------------------------------------------------------------------------|---------------|---------------|
| Eu-P6MOF                                                                                   | 0.6086        | 0.3285        |
| Eu-C6 2 $\mu$ L(0.02 $\mu$ g)                                                              | 0.5375        | 0.3686        |
| Eu-C6 4 $\mu$ L(0.04 $\mu$ g)                                                              | 0.4896        | 0.3973        |
| Eu-C6 6 $\mu$ L(0.06 $\mu$ g)                                                              | 0.4588        | 0.4178        |
| Eu-C6 8 $\mu$ L(0.08 $\mu$ g)                                                              | 0.4334        | 0.4352        |
| Eu-C6 8.5 $\mu$ L(0.085 $\mu$ g)                                                           | 0.4227        | 0.4397        |
| Eu-C6(0.085 $\mu$ g)-Perylene 5 $\mu$ L(0.05 $\mu$ g)                                      | 0.3956        | 0.4124        |
| Eu-C6(0.085 $\mu$ g)-Perylene 10 $\mu$ L(0.1 $\mu$ g)                                      | 0.3855        | 0.3872        |
| Eu-C6(0.085 $\mu$ g)-Perylene 15 $\mu$ L(0.15 $\mu$ g)                                     | 0.3719        | 0.3683        |
| Eu-C6(0.085 $\mu$ g)-Perylene 20 $\mu$ L(0.2 $\mu$ g)                                      | 0.357         | 0.353         |
| Eu-C6(0.085 $\mu$ g)-Perylene 25 $\mu$ L(0.25 $\mu$ g)                                     | 0.3489        | 0.3393        |
| Eu-C6(0.085 $\mu$ g)-Perylene 27.5 $\mu$ L(0.27.5 $\mu$ g)                                 | 0.3413        | 0.3327        |
| <b>Eu-C6(0.085 <math>\mu</math>g)-Perylene 30 <math>\mu</math>L(0.3 <math>\mu</math>g)</b> | <b>0.3393</b> | <b>0.3272</b> |
| Eu-C6(0.085 $\mu$ g)-Perylene 35 $\mu$ L(0.35 $\mu$ g)                                     | 0.3243        | 0.3147        |
| Eu-C6(0.085 $\mu$ g)-Perylene 40 $\mu$ L(0.4 $\mu$ g)                                      | 0.318         | 0.3041        |
| Eu-C6(0.085 $\mu$ g)-Perylene 45 $\mu$ L(0.45 $\mu$ g)                                     | 0.3099        | 0.2944        |
| Eu-C6(0.085 $\mu$ g)-Perylene 50 $\mu$ L(0.5 $\mu$ g)                                      | 0.3002        | 0.2853        |

**Table S9.** Fluorescence Titration and Corresponding CIE Coordinates of the Eu-P6MOF/C6/C1 system in EtOH.

| No.                                                 | CIE x  | CIE y  |
|-----------------------------------------------------|--------|--------|
| Eu-P6MOF                                            | 0.6092 | 0.3298 |
| Eu-C6 2 $\mu$ L(0.02 $\mu$ g)                       | 0.542  | 0.3728 |
| Eu-C6 4 $\mu$ L(0.04 $\mu$ g)                       | 0.4946 | 0.4012 |
| Eu-C6 6 $\mu$ L(0.06 $\mu$ g)                       | 0.4622 | 0.4227 |
| Eu-C6 8 $\mu$ L(0.08 $\mu$ g)                       | 0.4347 | 0.4399 |
| Eu-C6 8.5 $\mu$ L(0.085 $\mu$ g)                    | 0.4254 | 0.4449 |
| Eu-C6(0.085 $\mu$ g)-C1 2.5 $\mu$ L(0.025 $\mu$ g)  | 0.4071 | 0.4164 |
| Eu-C6(0.085 $\mu$ g)-C1 5 $\mu$ L(0.05 $\mu$ g)     | 0.39   | 0.3929 |
| Eu-C6(0.085 $\mu$ g)-C1 7.5 $\mu$ L(0.075 $\mu$ g)  | 0.3691 | 0.3728 |
| Eu-C6(0.085 $\mu$ g)-C1 10 $\mu$ L(0.1 $\mu$ g)     | 0.3582 | 0.3547 |
| Eu-C6(0.085 $\mu$ g)-C1 12.5 $\mu$ L(0.125 $\mu$ g) | 0.3464 | 0.3384 |
| Eu-C6(0.085 $\mu$ g)-C1 13 $\mu$ L(0.13 $\mu$ g)    | 0.3392 | 0.3353 |
| Eu-C6(0.085 $\mu$ g)-C1 13.5 $\mu$ L(0.135 $\mu$ g) | 0.3408 | 0.3327 |
| Eu-C6(0.085 $\mu$ g)-C1 14 $\mu$ L(0.14 $\mu$ g)    | 0.3375 | 0.3299 |
| Eu-C6(0.085 $\mu$ g)-C1 14.5 $\mu$ L(0.145 $\mu$ g) | 0.3363 | 0.3273 |
| Eu-C6(0.085 $\mu$ g)-C1 15 $\mu$ L(0.15 $\mu$ g)    | 0.3339 | 0.3249 |
| Eu-C6(0.085 $\mu$ g)-C1 17.5 $\mu$ L(0.175 $\mu$ g) | 0.3252 | 0.3122 |
| Eu-C6(0.085 $\mu$ g)-C1 20 $\mu$ L(0.2 $\mu$ g)     | 0.3151 | 0.3003 |

**Table S10.** Photostability of the **Eu-P6MOF/C1/C6/Perylene** System in EtOH.

| No.  | CIE x           | CIE y  | CIE x  | CIE y  | CIE x  | CIE y  | CIE x    | CIE y  | CIE x                 | CIE y  | CIE x                       | CIE y  |
|------|-----------------|--------|--------|--------|--------|--------|----------|--------|-----------------------|--------|-----------------------------|--------|
|      | <b>Eu-P6MOF</b> |        | C1     |        | C6     |        | Perylene |        | <b>Eu-P6MOF-C6-C1</b> |        | <b>Eu-P6MOF-C6-Perylene</b> |        |
| 0 h  | 0.6178          | 0.3313 | 0.1659 | 0.088  | 0.2209 | 0.5629 | 0.1689   | 0.0879 | 0.3403                | 0.3327 | 0.3404                      | 0.3342 |
| 1 h  | 0.6183          | 0.3299 | 0.1662 | 0.0924 | 0.2201 | 0.5636 | 0.1687   | 0.0877 | 0.3391                | 0.3367 | 0.3436                      | 0.3336 |
| 2 h  | 0.6147          | 0.3297 | 0.1666 | 0.0986 | 0.2195 | 0.5641 | 0.1684   | 0.0872 | 0.348                 | 0.3434 | 0.3429                      | 0.3339 |
| 3 h  | 0.611           | 0.3285 | 0.1673 | 0.1049 | 0.2191 | 0.5648 | 0.1683   | 0.0871 | 0.3497                | 0.3491 | 0.3375                      | 0.3332 |
| 4 h  | 0.6107          | 0.3294 | 0.1675 | 0.1089 | 0.219  | 0.5644 | 0.1685   | 0.0872 | 0.3498                | 0.3541 | 0.3384                      | 0.3337 |
| 16 h | 0.6011          | 0.3271 | 0.172  | 0.1462 | 0.2184 | 0.5653 | 0.1687   | 0.0884 | 0.3668                | 0.3796 | 0.3414                      | 0.3349 |
| 21 h | 0.5972          | 0.3253 | 0.1748 | 0.1655 | 0.2177 | 0.5658 | 0.1695   | 0.0897 | 0.3658                | 0.3794 | 0.3463                      | 0.3355 |
| 24 h | 0.595           | 0.3246 | 0.1756 | 0.1714 | 0.2175 | 0.5664 | 0.17     | 0.0906 | 0.3655                | 0.3794 | 0.3428                      | 0.3358 |

**Table S11.** CIE coordinates of the **Eu-P6MOF-C6-Perylene** in EtOH during storage.

| No.   | CIE x  | CIE y  |
|-------|--------|--------|
| 0 d   | 0.3404 | 0.3342 |
| 49 d  | 0.3248 | 0.3301 |
| 137 d | 0.3284 | 0.3235 |
| 153 d | 0.328  | 0.3244 |
| 166 d | 0.3238 | 0.3252 |

**Table S12.** Fluorescence properties of **Eu-P6MOF** and three dyes: Lifetimes at corresponding excitation wavelengths.

| solv | Sample                      | $\lambda_{\text{ex}}$ | $\tau$                     |
|------|-----------------------------|-----------------------|----------------------------|
|      |                             | 1                     |                            |
|      | <b>Eu-P6MOF</b>             | 375nm*                | 644.86980439 $\mu\text{s}$ |
|      | C1                          | 375nm                 | 3.1151 ns                  |
|      | C6                          | 450nm                 | 2.4845 ns                  |
| DMF  |                             | 375nm                 | 2.5975 ns                  |
|      | <b>Eu-P6MOF-C6- C1</b>      | 375nm                 | 3.2375 ns                  |
|      |                             | 450nm                 | 2.5026 ns                  |
|      |                             | 375nm*                | 634.8503604 $\mu\text{s}$  |
|      |                             | 2                     |                            |
|      | Perylene                    | 450nm                 | 4.4515 ns                  |
| DMF  |                             | 375nm                 | 4.5418 ns                  |
|      | <b>Eu-P6MOF-C6-Perylene</b> | 450nm                 | 3.13110429 ns              |
|      |                             | 375nm*                | 670.31021549 $\mu\text{s}$ |
|      |                             | 3                     |                            |
|      | <b>Eu-P6MOF</b>             | 375nm*                | 363.94896768 $\mu\text{s}$ |
|      | C1                          | 375nm                 | 3.1622 ns                  |
|      | C6                          | 450nm                 | 2.6846 ns                  |
| EtOH |                             | 375nm                 | 3.2313808 ns               |
|      |                             | 375nm                 | 3.2496 ns                  |
|      | <b>Eu-P6MOF-C6-C1</b>       | 450nm                 | 2.6756 ns                  |
|      |                             | 375nm*                | 314.2518513 $\mu\text{s}$  |
|      |                             | 4                     |                            |
|      | Perylene                    | 450nm                 | 4.321 ns                   |
| EtOH |                             | 375nm                 | 4.3099 ns                  |
|      | <b>Eu-P6MOF-C6-Perylene</b> | 450nm                 | 4.3262 ns                  |
|      |                             | 375nm*                | 320.36307736 $\mu\text{s}$ |

(375nm\*: testing with a 375nm microsecond lamp.)

**Table S13.** Temperature-dependent fluorescence lifetimes of **Eu-P6MOF-C6-C1** and **Eu-P6MOF-C6-Perylene** in DMF.

| solv | Sample                      | Temp.(K) | $\tau$ ( $\mu$ s) |
|------|-----------------------------|----------|-------------------|
| DMF  | <b>Eu-P6MOF-C6-C1</b>       | 323      | 854.5156          |
|      |                             | 348      | 785.0038          |
|      | 373                         | 707.091  |                   |
|      | <b>Eu-P6MOF-C6-Perylene</b> | 323      | 839.9249          |
|      |                             | 348      | 737.965           |
|      |                             | 373      | 651.0668          |

**Table S14.** Fluorescence properties of **Eu-P6MOF** and three dyes: Quantum yields at corresponding excitation wavelengths.

| solv                        | Sample                      | $\lambda_{ex}$ | $\Phi$ |        |
|-----------------------------|-----------------------------|----------------|--------|--------|
| DMF                         | 1                           |                |        |        |
|                             | <b>Eu-P6MOF</b>             | 296nm          | 2.10%  |        |
|                             |                             | C1             | 296nm  | 1.39%  |
|                             | 371nm                       |                | 17.41% |        |
|                             | C6                          | 296nm          | 2.25%  |        |
|                             |                             | 464nm          | 38.54% |        |
|                             | <b>Eu-P6MOF-C6-C1</b>       | 296nm          | 2.47%  |        |
|                             |                             | 371nm          | 10.90% |        |
|                             | 464nm                       | 14.82%         |        |        |
|                             | DMF                         | 2              |        |        |
|                             |                             | Perylene       | 296nm  | 0.94%  |
|                             |                             |                | 439nm  | 49.29% |
| <b>Eu-P6MOF-C6-Perylene</b> |                             | 296nm          | 0.80%  |        |
|                             |                             | 439nm          | 58.91% |        |
| 464nm                       |                             | 28.89%         |        |        |
| EtOH                        | 3                           |                |        |        |
|                             | <b>Eu-P6MOF</b>             | 296nm          | 0.52%  |        |
|                             |                             | C1             | 296nm  | 1.15%  |
|                             | 373nm                       |                | 39.17% |        |
|                             | C6                          | 296nm          | 1.26%  |        |
|                             |                             | 460nm          | 57.92% |        |
|                             | <b>Eu-P6MOF-C6-C1</b>       | 296nm          | 2.72%  |        |
|                             |                             | 373nm          | 17.76% |        |
| 460nm                       | 67.69%                      |                |        |        |
| EtOH                        | 4                           |                |        |        |
|                             | Perylene                    | 296nm          | 1.90%  |        |
|                             |                             | 435nm          | 48.30% |        |
|                             | <b>Eu-P6MOF-C6-Perylene</b> | 296nm          | 4.65%  |        |
| 435nm                       |                             | 71.80%         |        |        |
| 460nm                       | 37.49%                      |                |        |        |



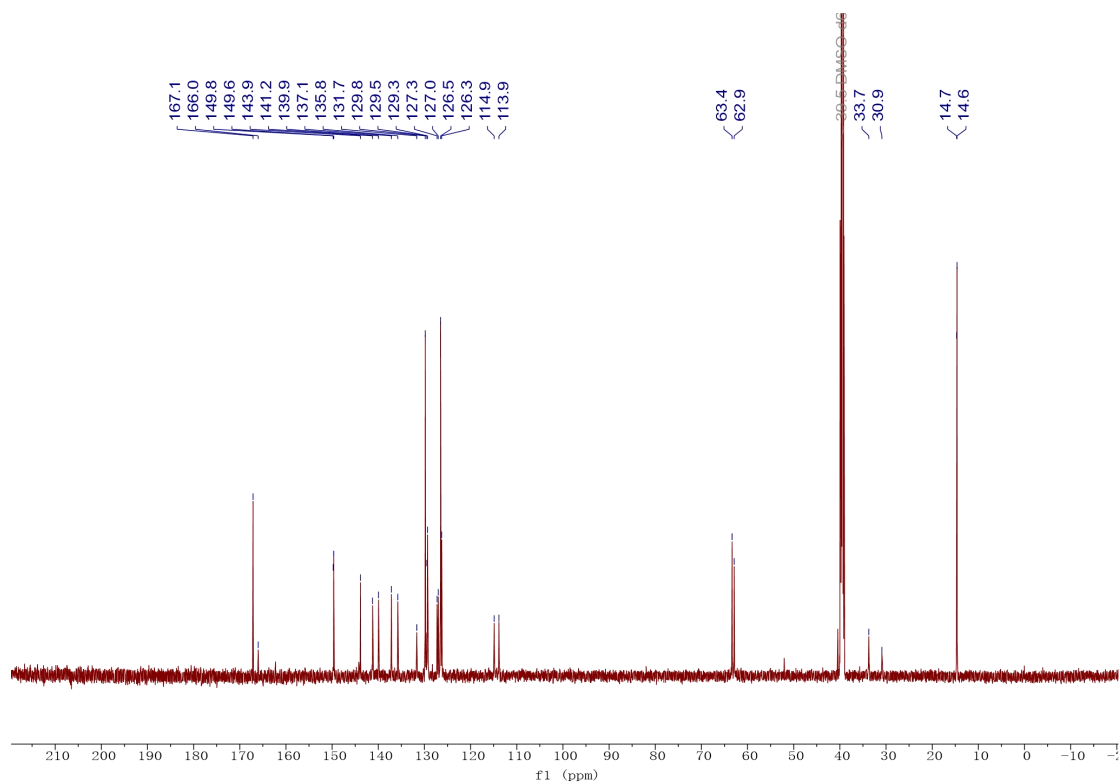

**Figure S91.**  $^{13}\text{C}$  NMR spectrum (600 MHz) of  $\text{H}_8\text{P6A}$  in  $\text{DMSO-}d_6$ .

### Reference

1. H. Zeng, P. Liu, H. Xing and F. Huang, *Angew. Chem. Int. Ed.*, 2022, **61**, e202115823.
